# Supplementary material for: Current status of neuroprotective and neuroregenerative strategies in multiple sclerosis: A systematic review
Source: PubMed Central journal article supplement — Mult Scler. 2021 Apr 19;28(1):29–48. doi: 10.1177/13524585211008760 (PMC8688986; doi:10.1177/13524585211008760), 2021-04-19
Supplement: sj-pdf-1-msj-10.1177_13524585211008760.pdf [file sj-pdf-1-msj-10.1177_13524585211008760.pdf]

## Supplementary material

**Table S1. Description of the search strategy.**

|                                             |                                                                                                                                                                                                                                                                                                                                                                                                                                                                                                                                                                                                                                                                                                                                                                                                                                                                                                                                                                                                                                                                                                                                                                                                                                                                                                                                                                                                                                                                                                                                                                                                                                                                                                                                                                                                                                                                                                                                                                                                                                                                                                     |
|---------------------------------------------|-----------------------------------------------------------------------------------------------------------------------------------------------------------------------------------------------------------------------------------------------------------------------------------------------------------------------------------------------------------------------------------------------------------------------------------------------------------------------------------------------------------------------------------------------------------------------------------------------------------------------------------------------------------------------------------------------------------------------------------------------------------------------------------------------------------------------------------------------------------------------------------------------------------------------------------------------------------------------------------------------------------------------------------------------------------------------------------------------------------------------------------------------------------------------------------------------------------------------------------------------------------------------------------------------------------------------------------------------------------------------------------------------------------------------------------------------------------------------------------------------------------------------------------------------------------------------------------------------------------------------------------------------------------------------------------------------------------------------------------------------------------------------------------------------------------------------------------------------------------------------------------------------------------------------------------------------------------------------------------------------------------------------------------------------------------------------------------------------------|
| Names of platform and databases searched    | Platform: Ovid<br>Databases: MEDLINE, Embase, EBM Review                                                                                                                                                                                                                                                                                                                                                                                                                                                                                                                                                                                                                                                                                                                                                                                                                                                                                                                                                                                                                                                                                                                                                                                                                                                                                                                                                                                                                                                                                                                                                                                                                                                                                                                                                                                                                                                                                                                                                                                                                                            |
| Database time coverage                      | January 2014 - January 2020                                                                                                                                                                                                                                                                                                                                                                                                                                                                                                                                                                                                                                                                                                                                                                                                                                                                                                                                                                                                                                                                                                                                                                                                                                                                                                                                                                                                                                                                                                                                                                                                                                                                                                                                                                                                                                                                                                                                                                                                                                                                         |
| Date searched                               | 16 January 2020                                                                                                                                                                                                                                                                                                                                                                                                                                                                                                                                                                                                                                                                                                                                                                                                                                                                                                                                                                                                                                                                                                                                                                                                                                                                                                                                                                                                                                                                                                                                                                                                                                                                                                                                                                                                                                                                                                                                                                                                                                                                                     |
| Search database strategy from each database |                                                                                                                                                                                                                                                                                                                                                                                                                                                                                                                                                                                                                                                                                                                                                                                                                                                                                                                                                                                                                                                                                                                                                                                                                                                                                                                                                                                                                                                                                                                                                                                                                                                                                                                                                                                                                                                                                                                                                                                                                                                                                                     |
| MEDLINE / EBM Review                        | <ol style="list-style-type: none"> <li>1. exp multiple sclerosis/ or (multiple sclerosis or disseminated sclerosis or insular sclerosis or sclerosis multiplex).ti,ab,kf,kw.</li> <li>2. exp nerve regeneration/ or exp wound healing/ or exp Cuprizone/ or ethidium/</li> <li>3. Galactosylceramides/im [Immunology]</li> <li>4. Lysophosphatidylcholines/</li> <li>5. (healing or healed or heal or cicatrix or cicatrization or cicatrization or neurogenerat* or neuroprotect* or remyelinat* or axon* or cuprizone or Biscyclohexanone oxaldihydrazone or bis-cyclohexanon oxaldihydrazone or bicyclohexone oxaldihydrazone or bis-cyclohexanone or bis cyclohexanone or oxaldihydrazone or Lysolethicin or lysophosphatidylcholine? or lysolecithin? or Ethidium bromide or Ethidium or anti-galactocerebroside or anti-gal or antigalactocerebroside).mp. [mp=title, abstract, original title, name of substance word, subject heading word, floating sub-heading word, keyword heading word, organism supplementary concept word, protocol supplementary concept word, rare disease supplementary concept word, unique identifier, synonyms]</li> <li>6. ((lesion* or spinal cord or nerve or myelin*) adj5 (repair* or reconstruct* or rebuild* or restor* or regenerat*)).mp. [mp=title, abstract, original title, name of substance word, subject heading word, floating sub-heading word, keyword heading word, organism supplementary concept word, protocol supplementary concept word, rare disease supplementary concept word, unique identifier, synonyms]</li> <li>7. 2 or 3 or 4 or 5 or 6</li> <li>8. 1 and 7</li> <li>9. exp myelin sheath/ or exp oligodendroglia/ or Demyelinating Diseases/ or Ranvier's Nodes/ or Neurilemma/</li> <li>10. (myelin* or demyelinat* or oligodendroglia or olygodendrocyte? or nodes of ranvier or ranvier nodes or ranviers nodes or neurilemma or neurolemma or schwann sheath or sheath or schwann).ab,kf,kw,ti.</li> <li>11. 9 or 10</li> <li>12. 8 and 11</li> <li>13. limit 12 to (english language and yr="2014 -Current")</li> </ol> |

---

Ovid EMBASE

1. exp multiple sclerosis/ or (multiple sclerosis or disseminated sclerosis or insular sclerosis or sclerosis multiplex).ti,ab,kw.
  2. exp nerve regeneration/ or exp wound healing/ or exp Cuprizone/ or ethidium/
  3. Galactosylceramides/im [Immunology]
  4. Lysophosphatidylcholines/
  5. (healing or healed or heal or cicatrix or cicatrisation or cicatrization or neurogenerat\* or neuroprotect\* or remyelinat\* or axon\* or cuprizone or Biscyclohexanone oxaldihydrazone or bis-cyclohexanon oxaldihydrazone or bicyclohexone oxaldihydrazone or bis-cyclohexanone or bis cyclohexanone or oxaldihydrazone or Lysolethicin or lysophosphatidylcholine? or lysolecithin? or Ethidium bromide or Ethidium or anti-galactocerebroside or anti-gal or antigalactocerebroside).mp. [mp=title, abstract, heading word, drug trade name, original title, device manufacturer, drug manufacturer, device trade name, keyword, floating subheading word, candidate term word]
  6. ((lesion\* or spinal cord or nerve or myelin\*) adj5 (repair\* or reconstruct\* or rebuild\* or restor\* or regenerat\*)).mp. [mp=title, abstract, heading word, drug trade name, original title, device manufacturer, drug manufacturer, device trade name, keyword, floating subheading word, candidate term word]
  7. 2 or 3 or 4 or 5 or 6
  8. 1 and 7
  9. exp myelin sheath/ or exp oligodendroglia/ or Demyelinating Diseases/ or Ranvier's Nodes/ or Neurilemma/ 10. (myelin\* or demyelinat\* or oligodendroglia or olygodendrocyte? or nodes of ranvier or ranvier nodes or ranviers nodes or neurilemma or neurolemma or schwann sheath or sheath or schwann).ab,kw,ti.
  11. 9 or 10
  12. 8 and 11
  13. limit 12 to (english language and yr="2014 -Current")
-

**Table S2. Inclusion and exclusion criteria for article screening.**

|           |                               |                                                                                                                                                                                                                                                                                                                                                                                                                                                                                                                                                                                                                                                                                                                                                                                                                                                                                                                                                                                                                                                                                                                                                                                                                                                                                                                                                                                                                                                                                                                                                                                                                                                                                                                                                                                                                                                                                                                                                                                                        |
|-----------|-------------------------------|--------------------------------------------------------------------------------------------------------------------------------------------------------------------------------------------------------------------------------------------------------------------------------------------------------------------------------------------------------------------------------------------------------------------------------------------------------------------------------------------------------------------------------------------------------------------------------------------------------------------------------------------------------------------------------------------------------------------------------------------------------------------------------------------------------------------------------------------------------------------------------------------------------------------------------------------------------------------------------------------------------------------------------------------------------------------------------------------------------------------------------------------------------------------------------------------------------------------------------------------------------------------------------------------------------------------------------------------------------------------------------------------------------------------------------------------------------------------------------------------------------------------------------------------------------------------------------------------------------------------------------------------------------------------------------------------------------------------------------------------------------------------------------------------------------------------------------------------------------------------------------------------------------------------------------------------------------------------------------------------------------|
| Inclusion | Human study or clinical trial | <ul style="list-style-type: none"> <li>• Written in English</li> <li>• Original data and peer reviewed</li> <li>• Full paper accessible by at least one of our institutions</li> <li>• Study evaluates intervention for individuals with a diagnosed form of MS</li> <li>• Clinical trial protocol is registered with ClinicalTrials.gov (all trial phases included)</li> <li>• Includes appropriate controls (i.e. patient matching, randomization, standard medication group, etc.)</li> <li>• Includes at least one measure of the following outcomes:             <ul style="list-style-type: none"> <li>○ Myelin content, lesion burden and/or atrophy, as determined by MRI or equivalent</li> <li>○ Disability and/or motor function</li> <li>○ Cognition</li> <li>○ Relapse rate and/or severity</li> <li>○ Progression</li> <li>○ Visual evoked potential</li> </ul> </li> </ul>                                                                                                                                                                                                                                                                                                                                                                                                                                                                                                                                                                                                                                                                                                                                                                                                                                                                                                                                                                                                                                                                                                              |
|           | Preclinical study             | <ul style="list-style-type: none"> <li>• Written in English</li> <li>• Original data and peer reviewed</li> <li>• Full paper accessible by at least one of our institutions</li> <li>• Study evaluates intervention in an animal model representative of one or more aspects of the neuropathology of MS</li> <li>• Findings from immune-mediated animal models (i.e. experimental autoimmune encephalomyelitis, EAE) were included if the studies noted one or more of the following:             <ul style="list-style-type: none"> <li>○ A negative result for changes in peripheral immune cell activity (activation, infiltration and/or inflammatory functions of T cells, B cells and/or macrophages) following systemic administration of a treatment, obtained using flow cytometric, ELISA/ELISPOT, histological or equivalent method</li> <li>○ Direct administration of the treatment to the site of damage (intrathecal, intracerebroventricular, etc.) to circumvent peripheral immune cells</li> <li>○ Confirmation of an observed effect in a complementary animal model with minimal peripheral immune cell involvement (cuprizone, LPC, etc.)</li> </ul> </li> <li>• Includes appropriate group sizes and controls (e.g. vehicle treatment and animal model comparator groups)</li> <li>• Includes at least one measure of the following outcomes:             <ul style="list-style-type: none"> <li>○ Myelin content</li> <li>○ Remyelination (as determined by axonal imaging)</li> <li>○ Oligodendrocyte viability and genesis</li> <li>○ OPC migration and/or proliferation and/or differentiation</li> <li>○ Neuron integrity and/or axonal regeneration</li> <li>○ Motor function and/or clinical symptomology</li> <li>○ Oxidative stress or neuronal dysfunction (as measured by mitochondrial function, reactive oxygen species generation, apoptosis, etc.)</li> <li>○ Growth/inhibitory factor expression and/or inflammatory glial cell activity</li> </ul> </li> </ul> |
| Exclusion | Human study or clinical trial | <ul style="list-style-type: none"> <li>• Does not meet inclusion criteria</li> <li>• Review article or book chapter</li> </ul>                                                                                                                                                                                                                                                                                                                                                                                                                                                                                                                                                                                                                                                                                                                                                                                                                                                                                                                                                                                                                                                                                                                                                                                                                                                                                                                                                                                                                                                                                                                                                                                                                                                                                                                                                                                                                                                                         |

---

**Preclinical  
study**

- Does not meet inclusion criteria
  - Review article or book chapter
  - Measured outcomes for Schwann cells or peripheral nervous system
  - Insufficient distinction of potential indirect effects on outcomes due to peripheral immune system modulation (i.e. immune-mediated animal models such as EAE)
  - Non-mammalian animal models
  - Intervention utilizes in vivo gene editing
  - Article is a poster abstract
-

**Table S3. Complete list of publications included for data extraction and review.**

| Article number | Author and date      | Title                                                                                                                                                                   | Experimental design          |
|----------------|----------------------|-------------------------------------------------------------------------------------------------------------------------------------------------------------------------|------------------------------|
| 1              | Abdallah 2019        | Evaluation of treatment of experimentally induced canine model of multiple sclerosis using laser activated non-expanded adipose derived stem cells.                     | Animal study                 |
| 2              | Akbari 2018          | Adenosine A2A receptor blockade attenuates spatial memory deficit and extent of demyelination areas in lysolecithin-induced demyelination model.                        | Animal study                 |
| 3              | Mohamed 2019         | Effects of enhanced environment and induced depression on cuprizone mouse model of demyelination                                                                        | Animal study                 |
| 4              | Alazrag 2019         | The role of LINGO-1 and myelin basic protein mRNAs in central remyelination in ethidium bromide-induced demyelination in rats                                           | Animal Study                 |
| 5              | Alme 2015            | Fingolimod does not enhance cerebellar remyelination in the cuprizone model.                                                                                            | Animal study                 |
| 6              | Atkinson 2019        | Diffusion tensor imaging identifies aspects of therapeutic estrogen receptor beta ligand-induced remyelination in a mouse model of multiple sclerosis.                  | Animal study                 |
| 7              | Azin 2015            | Fibroblast growth factor-2 enhanced the recruitment of progenitor cells and myelin repair in experimental demyelination of rat hippocampal formations                   | Animal study                 |
| 8              | Bae 2016             | Comparative Effects of Human Neural Stem Cells and Oligodendrocyte Progenitor Cells on the Neurobehavioral Disorders of Experimental Autoimmune Encephalomyelitis Mice. | Animal study                 |
| 9              | Bando 2019           | Disease modifying mitochondrial uncouplers, MP101, and a slow release ProDrug, MP201, in models of Multiple Sclerosis.                                                  | Animal study                 |
| 10             | Baradaran 2018       | Hesperetin reduces myelin damage and ameliorates glial activation in lysolecithin-induced focal demyelination model of rat optic chiasm                                 | Animal study                 |
| 11             | Barati 2019          | Mesenchymal stem cell mediated effects on microglial phenotype in cuprizone-induced demyelination model                                                                 | Animal study                 |
| 12             | Barkhof 2019         | Gnabac1 shows efficacy on MRI measures of neurodegeneration in relapsing-remitting MS patients over 48 weeks                                                            | Clinical trial (NCT02782858) |
| 13             | Beckmann 2018        | Brain region-specific enhancement of remyelination and prevention of demyelination by the CSF1R kinase inhibitor BLZ945                                                 | Animal study                 |
| 14             | Beigi Boroujeni 2020 | Intranasal delivery of SDF-1 alpha- preconditioned bone marrow mesenchymal cells improves remyelination in the cuprizone- induced mouse model of multiple sclerosis     | Animal study                 |
| 15             | Bellizzi 2016        | Platelet-activating factor receptors mediate excitatory postsynaptic hippocampal injury in experimental autoimmune encephalomyelitis                                    | Animal study                 |
| 16             | Berghoff 2017        | Dietary cholesterol promotes repair of demyelinated lesions in the adult brain                                                                                          | Animal study                 |

|    |                        |                                                                                                                                                                 |                                                     |
|----|------------------------|-----------------------------------------------------------------------------------------------------------------------------------------------------------------|-----------------------------------------------------|
| 17 | Bernal-Chico 2015      | Blockade of monoacylglycerol lipase inhibits oligodendrocyte excitotoxicity and prevents demyelination in vivo                                                  | Animal study                                        |
| 18 | Biname 2019            | Disruption of Sema3A/Plexin-A1 inhibitory signalling in oligodendrocytes as a therapeutic strategy to promote remyelination                                     | Animal study                                        |
| 19 | Blanc 2015             | Sphingosine-1-Phosphate Receptor Antagonism Enhances Proliferation and Migration of Engrafted Neural Progenitor Cells in a Model of Viral-Induced Demyelination | Animal study                                        |
| 20 | Bonetto 2017           | The novel synthetic microneurotrophin BNN27 protects mature oligodendrocytes against cuprizone-induced death, through the NGF receptor TrkA                     | Animal study                                        |
| 21 | Brambilla 2016         | Early effect of dalfampridine in patients with MS: A multi-instrumental approach to better investigate responsiveness                                           | Human study                                         |
| 22 | Busto 2018             | Ellagic acid protects from myelin-associated sphingolipid loss in experimental autoimmune encephalomyelitis                                                     | Animal study                                        |
| 23 | Cadavid 2019           | Safety and efficacy of opicinumab in patients with relapsing multiple sclerosis (SYNERGY): a randomised, placebo-controlled, phase 2 trial                      | Clinical trial (NCT01864148)                        |
| 24 | Carvalho 2015          | Anthocyanins suppress the secretion of proinflammatory mediators and oxidative stress, and restore ion pump activities in demyelination                         | Animal study                                        |
| 25 | Cerina 2018            | Protective potential of dimethyl fumarate in a mouse model of thalamocortical demyelination                                                                     | Animal study                                        |
| 26 | Chamberlain 2017       | Creatine enhances mitochondrial-mediated oligodendrocyte survival after demyelinating injury                                                                    | Animal study                                        |
| 27 | Chami 2017             | Acid sphingomyelinase deficiency enhances myelin repair after acute and chronic demyelination                                                                   | Animal study                                        |
| 28 | Chen 2014              | n-3 PUFA supplementation benefits microglial responses to myelin pathology                                                                                      | Animal study                                        |
| 29 | Chen 2017              | Histamine receptor 3 negatively regulates oligodendrocyte differentiation and remyelination                                                                     | Animal study                                        |
| 30 | Chen 2019              | Sephin1, which prolongs the integrated stress response, is a promising therapeutic for multiple sclerosis                                                       | Animal study                                        |
| 31 | Chen 2019              | Butyrate suppresses demyelination and enhances remyelination                                                                                                    | Animal study                                        |
| 32 | Choi 2016              | A Diet Mimicking Fasting Promotes Regeneration and Reduces Autoimmunity and Multiple Sclerosis Symptoms                                                         | Animal study and pilot clinical trial (NCT01538355) |
| 33 | Church 2017            | E6020, a synthetic TLR4 agonist, accelerates myelin debris clearance, Schwann cell infiltration, and remyelination in the rat spinal cord                       | Animal study                                        |
| 34 | Cisneros-Mejorado 2019 | Demyelination-Remyelination of the Rat Caudal Cerebellar Peduncle Evaluated with Magnetic Resonance Imaging                                                     | Animal study                                        |
| 35 | Cree 2018              | A Phase 1, multiple-dose study of elezanumab (ABT-555) in patients with relapsing forms of multiple sclerosis                                                   | Clinical trial (NCT02601885)                        |
| 36 | Cui 2018               | The antibody rHlgM22 facilitates hippocampal remyelination and ameliorates memory deficits in the cuprizone mouse model of demyelination                        | Animal study                                        |

|    |                      |                                                                                                                                                                                                        |                              |
|----|----------------------|--------------------------------------------------------------------------------------------------------------------------------------------------------------------------------------------------------|------------------------------|
| 37 | Cui 2019             | Donepezil, a drug for Alzheimer's disease, promotes oligodendrocyte generation and remyelination                                                                                                       | Animal study                 |
| 38 | Daneshdoust 2017     | Pregabalin enhances myelin repair and attenuates glial activation in lysolecithin-induced demyelination model of rat optic chiasm                                                                      | Animal study                 |
| 39 | deSantana Nunes 2016 | Phosphodiesterase-5 inhibition promotes remyelination by MCP-1/CCR-2 and MMP-9 regulation in a cuprizone-induced demyelination model                                                                   | Animal study                 |
| 40 | DiBiase 2014         | Eicosapentaenoic acid pre-treatment reduces biochemical changes induced in total brain and myelin of weanling Wistar rats by cuprizone feeding                                                         | Animal study                 |
| 41 | Duan 2018            | Sulfasalazine alters microglia phenotype by competing endogenous RNA effect of miR-136-5p and long non-coding RNA HOTAIR in cuprizone-induced demyelination                                            | Animal study                 |
| 42 | Ehling 2015          | Impact of glatiramer acetate on paraclinical markers of neuroprotection in multiple sclerosis: A prospective observational clinical trial                                                              | Human study                  |
| 43 | Eisen 2017           | A double-blind, placebo-controlled, single ascending-dose study of remyelinating antibody rHIgM22 in people with multiple sclerosis                                                                    | Clinical trial (NCT01803867) |
| 44 | El-Akabawy 2015      | Beneficial effects of bone marrow-derived mesenchymal stem cell transplantation in a non-immune model of demyelination                                                                                 | Animal study                 |
| 45 | El-Etr 2015          | Progesterone and nesterone promote myelin regeneration in chronic demyelinating lesions of corpus callosum and cerebral cortex                                                                         | Animal study                 |
| 46 | Elbaz 2018           | Neuroprotective effect of linagliptin against cuprizone-induced demyelination and behavioural dysfunction in mice: A pivotal role of AMPK/SIRT1 and JAK2/STAT3/NF-kappaB signalling pathway modulation | Animal study                 |
| 47 | Feliu 2015           | A Sativex-like combination of phytocannabinoids as a disease-modifying therapy in a viral model of multiple sclerosis                                                                                  | Animal study                 |
| 48 | Feliu 2017           | 2-arachidonoylglycerol reduces proteoglycans and enhances remyelination in a progressive model of demyelination                                                                                        | Animal study                 |
| 49 | Feng 2017            | Using diffusion tensor imaging to quantify effects of autologous mesenchymal stem cell transplantation in multiple sclerosis patients                                                                  | Human study                  |
| 50 | Freeman 2015         | Safety and tolerability of anti-lingo-1 monoclonal antibody BIIB033 in acute optic neuritis: The renew trial.                                                                                          | Clinical trial (NCT01721161) |
| 51 | Gao 2016             | GDNF Enhances Therapeutic Efficiency of Neural Stem Cells-Based Therapy in Chronic Experimental Allergic Encephalomyelitis in Rat                                                                      | Animal study                 |
| 52 | Gelibter 2017        | Chronic 4-aminopyridine treatment enhances intracortical glutamatergic transmission in progressive multiple sclerosis                                                                                  | Human study                  |
| 53 | Ghaiad 2017          | Resveratrol Promotes Remyelination in Cuprizone Model of Multiple Sclerosis: Biochemical and Histological Study                                                                                        | Animal study                 |

|    |                |                                                                                                                                                                                             |                              |
|----|----------------|---------------------------------------------------------------------------------------------------------------------------------------------------------------------------------------------|------------------------------|
| 54 | Ghasemi 2014   | Transplantation of human adipose-derived stem cells enhances remyelination in lysolecithin-induced focal demyelination of rat spinal cord                                                   | Animal study                 |
| 55 | Gilani 2014    | Evaluation of GABAergic transmission modulation as a novel functional target for management of multiple sclerosis: Exploring inhibitory effect of GABA on glutamate-mediated excitotoxicity | Animal study                 |
| 56 | Glenn 2015     | Disparate effects of mesenchymal stem cells in experimental autoimmune encephalomyelitis and cuprizone-induced demyelination                                                                | Animal study                 |
| 57 | Gol 2017       | Fingolimod enhances myelin repair of hippocampus in pentylenetetrazol-induced kindling model                                                                                                | Animal study                 |
| 58 | Gonzalez 2016  | Tamoxifen accelerates the repair of demyelinated lesions in the central nervous system                                                                                                      | Animal study                 |
| 59 | Green 2017     | Clemastine fumarate as a remyelinating therapy for multiple sclerosis (ReBUILD): a randomised, controlled, double-blind, crossover trial.                                                   | Clinical trial (NCT02040298) |
| 60 | Greenberg 2014 | Two-photon imaging of remyelination of spinal cord axons by engrafted neural precursor cells in a viral model of multiple sclerosis.                                                        | Animal study                 |
| 61 | Gresle 2016    | Blocking LINGO-1 in vivo reduces degeneration and enhances regeneration of the optic nerve.                                                                                                 | Animal study                 |
| 62 | Guo 2018       | Vitamin C promotes oligodendrocytes generation and remyelination.                                                                                                                           | Animal study                 |
| 63 | Gurevich 2018  | Fingolimod-improved axonal and myelin integrity of white matter tracts associated with multiple sclerosis-related functional impairments.                                                   | Human study                  |
| 64 | Hainz 2017     | Probenecid-treatment reduces demyelination induced by cuprizone feeding.                                                                                                                    | Animal study                 |
| 65 | Hamaguchi 2019 | Circulating transforming growth factor-beta1 facilitates remyelination in the adult central nervous system.                                                                                 | Animal study                 |
| 66 | Hartley 2019   | Myelin repair stimulated by CNS-selective thyroid hormone action.                                                                                                                           | Animal study                 |
| 67 | Hashimoto 2017 | The flavonoid Baicalein attenuates cuprizone-induced demyelination via suppression of neuroinflammation.                                                                                    | Animal study                 |
| 68 | He 2019        | Ethyl pyruvate enhances spontaneous remyelination by targeting microglia phagocytosis.                                                                                                      | Animal study                 |
| 69 | Hlavica 2017   | Intrathecal insulin-like growth factor 1 but not insulin enhances myelin repair in young and aged rats.                                                                                     | Animal study                 |
| 70 | Hundehege 2018 | Targeting Voltage-Dependent Calcium Channels with Pregabalin Exerts a Direct Neuroprotective Effect in an Animal Model of Multiple Sclerosis.                                               | Animal study                 |
| 71 | Hundehege 2019 | The next-generation sphingosine-1 receptor modulator BAF312 (siponimod) improves cortical network functionality in focal autoimmune encephalomyelitis.                                      | Animal study                 |
| 72 | Ineichen 2017  | Nogo-A antibodies enhance axonal repair and remyelination in neuro-inflammatory and demyelinating pathology.                                                                                | Animal study                 |
| 73 | Ingwersen 2018 | Nimodipine confers clinical improvement in two models of experimental autoimmune encephalomyelitis                                                                                          | Animal study                 |
| 74 | Itoh 2017      | Bedside to bench to bedside research: Estrogen receptor beta ligand as a candidate neuroprotective treatment for multiple sclerosis.                                                        | Animal study                 |



|    |                  |                                                                                                                                                      |              |
|----|------------------|------------------------------------------------------------------------------------------------------------------------------------------------------|--------------|
| 75 | Iwasa 2014       | Prostaglandin F2alpha FP receptor inhibitor reduces demyelination and motor dysfunction in a cuprizone-induced multiple sclerosis mouse model        | Animal study |
| 76 | Jensen 2018      | Multimodal Enhancement of Remyelination by Exercise with a Pivotal Role for Oligodendroglial PGC1alpha.                                              | Animal study |
| 77 | Jia 2019         | Cordycepin (3'-deoxyadenosine) promotes remyelination via suppression of neuroinflammation in a cuprizone-induced mouse model of demyelination.      | Animal study |
| 78 | Jiang 2017       | Amelioration of experimental autoimmune encephalomyelitis through transplantation of placental derived mesenchymal stem cells.                       | Animal study |
| 79 | Jin 2019         | Leonurine suppresses neuroinflammation through promoting oligodendrocyte maturation.                                                                 | Animal study |
| 80 | Karamita 2017    | Therapeutic inhibition of soluble brain TNF promotes remyelination by increasing myelin phagocytosis by microglia.                                   | Animal study |
| 81 | Kashani 2014     | Protective effects of melatonin against mitochondrial injury in a mouse model of multiple sclerosis.                                                 | Animal study |
| 82 | Kashani 2015     | Progesterone Enhanced Remyelination in the Mouse Corpus Callosum after Cuprizone Induced Demyelination.                                              | Animal study |
| 83 | Kataria 2018     | Neuregulin-1 promotes remyelination and fosters a pro-regenerative inflammatory response in focal demyelinating lesions of the spinal cord.          | Animal study |
| 84 | Keough 2016      | An inhibitor of chondroitin sulfate proteoglycan synthesis promotes central nervous system remyelination.                                            | Animal study |
| 85 | Khan 2014        | SIRT1 activating compounds reduce oxidative stress mediated neuronal loss in viral induced CNS demyelinating disease.                                | Animal study |
| 86 | Khan 2017        | Mitochondrial Uncoupler Prodrug of 2,4-Dinitrophenol, MP201, Prevents Neuronal Damage and Preserves Vision in Experimental Optic Neuritis.           | Animal study |
| 87 | Khodanovich 2019 | Plant polyprenols reduce demyelination and recover impaired oligodendrogenesis and neurogenesis in the cuprizone murine model of multiple sclerosis. | Animal study |
| 88 | Kim 2018         | Functional antagonism of sphingosine-1-phosphate receptor 1 prevents cuprizone-induced demyelination.                                                | Animal study |
| 89 | Komegae 2017     | Multiple functional therapeutic effects of TnP: A small stable synthetic peptide derived from fish venom in a mouse model of multiple sclerosis.     | Animal study |
| 90 | Kramann 2016     | Laquinimod prevents cuprizone-induced demyelination independent of Toll-like receptor signaling.                                                     | Animal study |
| 91 | Kuboyama 2017    | Protamine neutralizes chondroitin sulfate proteoglycan-mediated inhibition of oligodendrocyte differentiation.                                       | Animal study |
| 92 | Kumar 2018       | Preclinical Explorative Assessment of Dimethyl Fumarate-Based Biocompatible Nanolipoidal Carriers for the Management of Multiple Sclerosis.          | Animal study |
| 93 | Kumar 2019       | Oral Delivery of Methylthioadenosine to the Brain Employing Solid Lipid Nanoparticles: Pharmacokinetic, Behavioral, and Histopathological Evidences. | Animal study |
| 94 | Kuroda 2017      | Peripherally derived FGF21 promotes remyelination in the central nervous system.                                                                     | Animal study |

|     |                 |                                                                                                                                                                                                                          |                              |
|-----|-----------------|--------------------------------------------------------------------------------------------------------------------------------------------------------------------------------------------------------------------------|------------------------------|
| 95  | Laflamme 2018   | mCSF-Induced Microglial Activation Prevents Myelin Loss and Promotes Its Repair in a Mouse Model of Multiple Sclerosis.                                                                                                  | Animal study                 |
| 96  | Largani 2019    | Oligoprotective effect of metformin through the AMPK-dependent on restoration of mitochondrial hemostasis in the cuprizone-induced multiple sclerosis model.                                                             | Animal study                 |
| 97  | Li 2017         | LINGO-1-Fc-Transduced Neural Stem Cells Are Effective Therapy for Chronic Stage Experimental Autoimmune Encephalomyelitis.                                                                                               | Animal study                 |
| 98  | Li 2019         | Ginkgolide K supports remyelination via induction of astrocytic IGF/PI3K/Nrf2 axis.                                                                                                                                      | Animal study                 |
| 99  | Liang 2015      | Epimedium flavonoids ameliorate neuropathological changes and increases IGF-1 expression in C57BL/6 mice exposed to cuprizone.                                                                                           | Animal study                 |
| 100 | Liu 2015        | Electroacupuncture Promotes the Differentiation of Transplanted Bone Marrow Mesenchymal Stem Cells Preinduced With Neurotrophin-3 and Retinoic Acid Into Oligodendrocyte-Like Cells in Demyelinated Spinal Cord of Rats. | Animal study                 |
| 101 | Lu 2019         | Shikimic Acid Promotes Oligodendrocyte Precursor Cell Differentiation and Accelerates Remyelination in Mice.                                                                                                             | Animal study                 |
| 102 | Luo 2017        | Inhibition of Drp1 hyper-activation is protective in animal models of experimental multiple sclerosis.                                                                                                                   | Animal study                 |
| 103 | Luo 2018        | Modulation of proteoglycan receptor PTPsigma enhances MMP-2 activity to promote recovery from multiple sclerosis.                                                                                                        | Animal study                 |
| 104 | Madadi 2019     | Astrocyte ablation induced by La-aminoadipate (L-AAA) potentiates remyelination in a cuprizone demyelinating mouse model.                                                                                                | Animal study                 |
| 105 | Madsen 2017     | Prolonged stimulation of a brainstem raphe region attenuates experimental autoimmune encephalomyelitis.                                                                                                                  | Animal study                 |
| 106 | Makinodan 2016  | Social isolation impairs remyelination in mice through modulation of IL-6.                                                                                                                                               | Animal study                 |
| 107 | Mandolesi 2019  | Voluntary running wheel attenuates motor deterioration and brain damage in cuprizone-induced demyelination.                                                                                                              | Animal study                 |
| 108 | Manterola 2018  | Deregulation of the endocannabinoid system and therapeutic potential of ABHD6 blockade in the cuprizone model of demyelination.                                                                                          | Animal study                 |
| 109 | Marzban 2018    | Effect of Multiple Intraperitoneal Injections of Human Bone Marrow Mesenchymal Stem Cells on Cuprizone Model of Multiple Sclerosis.                                                                                      | Animal study                 |
| 110 | Mashayekhi 2015 | Administration of leukemia inhibitory factor increases Opalin and myelin oligodendrocyte glycoprotein expression in the cerebral cortex in a cuprizone-induced model of demyelination.                                   | Animal study                 |
| 111 | Mashayekhi 2016 | Administration of vitamin D3 induces CNPase and myelin oligodendrocyte glycoprotein expression in the cerebral cortex of the murine model of cuprizone-induced demyelination.                                            | Animal study                 |
| 112 | McNicholas 2017 | A double blind, randomized, placebo controlled, crossover study of the effectiveness of oral fampridine in improving upper limb function in progressive multiple sclerosis                                               | Clinical trial (NCT02208050) |

|     |                       |                                                                                                                                                                               |                              |
|-----|-----------------------|-------------------------------------------------------------------------------------------------------------------------------------------------------------------------------|------------------------------|
| 113 | Mecha 2019            | The endocannabinoid 2-AG enhances spontaneous remyelination by targeting microglia.                                                                                           | Animal study                 |
| 114 | Medina-Rodriguez 2017 | Promoting in vivo remyelination with small molecules: a neuroreparative pharmacological treatment for Multiple Sclerosis.                                                     | Animal study                 |
| 115 | Mei 2016              | Identification of the Kappa-Opioid Receptor as a Therapeutic Target for Oligodendrocyte Remyelination.                                                                        | Animal study                 |
| 116 | Mellion 2017          | Efficacy Results from the Phase 2b SYNERGY Study: treatment of Disabling Multiple Sclerosis with the Anti-LINGO-1 Monoclonal Antibody Opicinumab                              | Clinical trial (NCT01864148) |
| 117 | MikaeiliAgah 2014     | Therapeutic effect of transplanted human Wharton's jelly stem cell-derived oligodendrocyte progenitor cells (hWJ-MS-C-derived OPCs) in an animal model of multiple sclerosis. | Animal study                 |
| 118 | Mohammadi-Rad 2019    | Evaluation of apamin effects on myelination process in C57BL/6 mice model of multiple sclerosis.                                                                              | Animal study                 |
| 119 | Moore 2014            | Multiple functional therapeutic effects of the estrogen receptor beta agonist indazole-Cl in a mouse model of multiple sclerosis.                                             | Animal study                 |
| 120 | Moreno 2017           | Methylthioadenosine promotes remyelination by inducing oligodendrocyte differentiation                                                                                        | Animal study                 |
| 121 | MousaviMajd 2018      | Inhibition of GABA A receptor improved spatial memory impairment in the local model of demyelination in rat hippocampus.                                                      | Animal study                 |
| 122 | Mullin 2017           | rHlgM22 enhances remyelination in the brain of the cuprizone mouse model of demyelination.                                                                                    | Animal study                 |
| 123 | Muramatsu 2015        | Prostacyclin prevents pericyte loss and demyelination induced by lysophosphatidylcholine in the central nervous system.                                                       | Animal study                 |
| 124 | Naghibzadeh 2018      | Effects of Two Training Programs on Transcriptional Levels of Neurotrophins and Glial Cells Population in Hippocampus of Experimental Multiple Sclerosis.                     | Animal study                 |
| 125 | Najm 2015             | Drug-based modulation of endogenous stem cells promotes functional remyelination in vivo.                                                                                     | Animal study                 |
| 126 | Navarrete 2018        | Hypoxia mimetic activity of VCE-004.8, a cannabidiol quinone derivative: implications for multiple sclerosis therapy.                                                         | Animal study                 |
| 127 | Neelamma 2018         | Evaluation of protective neuro pharmacological activity of seeds of cucurbita maxima against ethidium bromide induced demyelination in rat model                              | Animal study                 |
| 128 | Neumann 2019          | Metformin Restores CNS Remyelination Capacity by Rejuvenating Aged Stem Cells.                                                                                                | Animal study                 |
| 129 | Niknam 2019           | Modulating proteoglycan receptor PTPsigma using intracellular sigma peptide improves remyelination and functional recovery in mice with demyelinated optic chiasm.            | Animal study                 |
| 130 | Nyamoya 2019          | Laquinimod Supports Remyelination in Non-Supportive Environments.                                                                                                             | Animal study                 |
| 131 | Nystad 2014           | Effect of high-dose 1.25 dihydroxyvitamin D3 on remyelination in the cuprizone model.                                                                                         | Animal study                 |
| 132 | Nystad 2018           | Effects of vitamin D on axonal damage during de- and remyelination in the cuprizone model.                                                                                    | Animal study                 |
| 133 | Nystad 2020           | Fingolimod downregulates brain sphingosine-1-phosphate receptor 1 levels but does not promote remyelination or neuroprotection in the cuprizone model.                        | Animal study                 |

|     |                       |                                                                                                                                                                                     |                              |
|-----|-----------------------|-------------------------------------------------------------------------------------------------------------------------------------------------------------------------------------|------------------------------|
| 134 | Ohgomori 2019         | Cuprizone-induced demyelination in the mouse hippocampus is alleviated by phytoestrogen genistein.                                                                                  | Animal study                 |
| 135 | Olmstead 2018         | Transcranial and pulsed focused ultrasound that activates brain can accelerate remyelination in a mouse model of multiple sclerosis.                                                | Animal study                 |
| 136 | Omotoso 2018          | Kolaviron protects the brain in cuprizone- induced model of experimental multiple sclerosis via enhancement of intrinsic antioxidant mechanisms: Possible therapeutic applications? | Animal study                 |
| 137 | Omotoso 2018          | Kolaviron Protects the Prefrontal Cortex and Hippocampus against Histomorphological and Neurobehavioural Changes in Cuprizone Model of Multiple Sclerosis.                          | Animal study                 |
| 138 | Ou 2016               | Olig2-Targeted G-Protein-Coupled Receptor Gpr17 Regulates Oligodendrocyte Survival in Response to Lysolecithin-Induced Demyelination.                                               | Animal study                 |
| 139 | Oveland 2018          | 1,25-Dihydroxyvitamin-D3 induces brain proteomic changes in cuprizone mice during remyelination involving calcium proteins.                                                         | Animal study                 |
| 140 | Payghani 2018         | Effects of levothyroxine on visual evoked potential impairment following local injections of lysolecithin into the rat optic chiasm                                                 | Animal study                 |
| 141 | Petersen 2017         | Fibrinogen Activates BMP Signaling in Oligodendrocyte Progenitor Cells and Inhibits Remyelination after Vascular Damage.                                                            | Animal study                 |
| 142 | Pol 2019              | Teriflunomide's Effect on Glia in Experimental Demyelinating Disease: A Neuroimaging and Histologic Study.                                                                          | Animal study                 |
| 143 | Popescu 2018          | Vitamin K enhances the production of brain sulfatides during remyelination.                                                                                                         | Animal study                 |
| 144 | Popovic 2015          | Neuroprotective arylpiperazine dopaminergic/serotonergic ligands suppress experimental autoimmune encephalomyelitis in rats.                                                        | Animal study                 |
| 145 | Pourabdolhossein 2014 | Nogo receptor inhibition enhances functional recovery following lysolecithin-induced demyelination in mouse optic chiasm.                                                           | Animal study                 |
| 146 | Pourabdolhossein 2017 | Nogo receptor blockade enhances subventricular zone's stem cells proliferation and differentiation in demyelination context                                                         | Animal study                 |
| 147 | Pringproa 2016        | Intravenous transplantation of mouse embryonic stem cells attenuates demyelination in an ICR outbred mouse model of demyelinating diseases.                                         | Animal study                 |
| 148 | Qin 2017              | GD1a Overcomes Inhibition of Myelination by Fibronectin via Activation of Protein Kinase A: Implications for Multiple Sclerosis.                                                    | Animal study                 |
| 149 | Raftopoulos 2016      | Phenytoin for neuroprotection in patients with acute optic neuritis: a randomised, placebo-controlled, phase 2 trial.                                                               | Clinical trial (NCT01451593) |
| 150 | RagerdiKashani 2017   | Protective effects of erythropoietin against cuprizone-induced oxidative stress and demyelination in the mouse corpus callosum                                                      | Animal study                 |
| 151 | Rankin 2019           | Selective Estrogen Receptor Modulators Enhance CNS Remyelination Independent of Estrogen Receptors.                                                                                 | Animal study                 |

|     |                     |                                                                                                                                                                                                                       |                                    |
|-----|---------------------|-----------------------------------------------------------------------------------------------------------------------------------------------------------------------------------------------------------------------|------------------------------------|
| 152 | Ratzer 2016         | Monthly oral methylprednisolone pulse treatment in progressive multiple sclerosis.                                                                                                                                    | Clinical trial (NCT01305837)       |
| 153 | Razavi 2018         | Co-Transplantation of Human Neurotrophic Factor Secreting Cells and Adipose-Derived Stem Cells in Rat Model of Multiple Sclerosis.                                                                                    | Animal study                       |
| 154 | Rinaldi 2016        | Galectin-1 circumvents lysolecithin-induced demyelination through the modulation of microglial polarization/phagocytosis and oligodendroglial differentiation.                                                        | Animal study                       |
| 155 | Rinker 2016         | Results of a pilot trial of lithium in progressive multiple sclerosis                                                                                                                                                 | Pilot clinical trial (NCT01259388) |
| 156 | Rittchen 2015       | Myelin repair in vivo is increased by targeting oligodendrocyte precursor cells with nanoparticles encapsulating leukaemia inhibitory factor (LIF).                                                                   | Animal study                       |
| 157 | SalinasTejedor 2015 | Mesenchymal stem cells do not exert direct beneficial effects on CNS remyelination in the absence of the peripheral immune system.                                                                                    | Animal study                       |
| 158 | Samanta 2015        | Inhibition of Gli1 mobilizes endogenous neural stem cells for remyelination.                                                                                                                                          | Animal study                       |
| 159 | Sanadgol 2017       | Neuroprotective effects of ellagic acid on cuprizone-induced acute demyelination through limitation of microgliosis, adjustment of CXCL12/IL-17/IL-11 axis and restriction of mature oligodendrocytes apoptosis.      | Animal study                       |
| 160 | Sanadgol 2018       | Low, but not high, dose triptolide controls neuroinflammation and improves behavioral deficits in toxic model of multiple sclerosis by dampening of NF-kappaB activation and acceleration of intrinsic myelin repair. | Animal study                       |
| 161 | Sanadgol 2018       | Alpha-lipoic acid mitigates toxic-induced demyelination in the corpus callosum by lessening of oxidative stress and stimulation of polydendrocytes proliferation.                                                     | Animal study                       |
| 162 | Sanchez 2018        | Genetic detection of Sonic hedgehog (Shh) expression and cellular response in the progression of acute through chronic demyelination and remyelination.                                                               | Animal study                       |
| 163 | Sarswat 2017        | Inhibitors of protein arginine deiminases and their efficacy in animal models of multiple sclerosis.                                                                                                                  | Animal study                       |
| 164 | Schampel 2017       | Nimodipine fosters remyelination in a mouse model of multiple sclerosis and induces microglia-specific apoptosis.                                                                                                     | Animal study                       |
| 165 | Schwartzbach 2017   | Lesion remyelinating activity of GSK239512 versus placebo in patients with relapsing-remitting multiple sclerosis: a randomised, single-blind, phase II study.                                                        | Clinical trial (NCT01772199)       |
| 166 | Semnani 2017        | Effects of green tea epigallocatechin-3-gallate on the proteolipid protein and oligodendrocyte transcription factor 1 messenger RNA gene expression in a mouse model of multiple sclerosis.                           | Animal study                       |
| 167 | Seyedsadr 2019      | Inactivation of sphingosine-1-phosphate receptor 2 (S1PR2) decreases demyelination and enhances remyelination in animal models of multiple sclerosis.                                                                 | Animal study                       |
| 168 | Singhal 2018        | Erythropoietin Upregulates Brain Hemoglobin Expression and Supports Neuronal Mitochondrial Activity.                                                                                                                  | Animal study                       |
| 169 | Skripuletz 2015     | Pivotal role of choline metabolites in remyelination.                                                                                                                                                                 | Animal study                       |

|     |                    |                                                                                                                                                                      |              |
|-----|--------------------|----------------------------------------------------------------------------------------------------------------------------------------------------------------------|--------------|
| 170 | Slowik 2015        | The sphingosine 1-phosphate receptor agonist FTY720 is neuroprotective after cuprizone-induced CNS demyelination.                                                    | Animal study |
| 171 | Smith 2015         | SEMA4D compromises blood-brain barrier, activates microglia, and inhibits remyelination in neurodegenerative disease.                                                | Animal study |
| 172 | Suhs 2014          | N-methyl-D-aspartate receptor blockade is neuroprotective in experimental autoimmune optic neuritis.                                                                 | Animal study |
| 173 | Sui 2019           | Protective and therapeutic role of Bilobalide in cuprizone-induced demyelination.                                                                                    | Animal study |
| 174 | Suo 2019           | Inhibition of MAPK/ERK pathway promotes oligodendrocytes generation and recovery of demyelinating diseases.                                                          | Animal study |
| 175 | Syed 2016          | Antibody-mediated neutralization of myelin-associated EphrinB3 accelerates CNS remyelination.                                                                        | Animal study |
| 176 | Tahmasebi 2019     | Effect of the CSF1R inhibitor PLX3397 on remyelination of corpus callosum in a cuprizone-induced demyelination mouse model.                                          | Animal study |
| 177 | Tanikawa 2017      | q-Space Myelin Map imaging for longitudinal analysis of demyelination and remyelination in multiple sclerosis patients treated with fingolimod: A preliminary study. | Human study  |
| 178 | Tarbali 2016       | Vitamin D3 attenuates oxidative stress and cognitive deficits in a model of toxic demyelination.                                                                     | Animal study |
| 179 | Templeton 2019     | Clozapine administration enhanced functional recovery after cuprizone demyelination.                                                                                 | Animal study |
| 180 | Thiruvalluvan 2016 | Survival and Functionality of Human Induced Pluripotent Stem Cell-Derived Oligodendrocytes in a Nonhuman Primate Model for Multiple Sclerosis.                       | Animal study |
| 181 | Thompson 2018      | Tuftsia Combines with Remyelinating Therapy and Improves Outcomes in Models of CNS Demyelinating Disease.                                                            | Animal study |
| 182 | Vakilzadeh 2015    | Protective Effect of a cAMP Analogue on Behavioral Deficits and Neuropathological Changes in Cuprizone Model of Demyelination.                                       | Animal study |
| 183 | Vakilzadeh 2016    | The Effect of Melatonin on Behavioral, Molecular, and Histopathological Changes in Cuprizone Model of Demyelination.                                                 | Animal study |
| 184 | Villoslada 2019    | Axonal and Myelin Neuroprotection by the Peptoid BN201 in Brain Inflammation.                                                                                        | Animal study |
| 185 | Voskuhl 2019       | Gene expression in oligodendrocytes during remyelination reveals cholesterol homeostasis as a therapeutic target in multiple sclerosis.                              | Animal study |
| 186 | Wang 2014          | Lingo-1 inhibited by RNA interference promotes functional recovery of experimental autoimmune encephalomyelitis.                                                     | Animal study |
| 187 | Wang 2016          | Scutellarin Alleviates Behavioral Deficits in a Mouse Model of Multiple Sclerosis, Possibly Through Protecting Neural Stem Cells.                                    | Animal study |
| 188 | Wang 2019          | Therapeutic effect of oligomeric proanthocyanidin in cuprizone-induced demyelination.                                                                                | Animal study |
| 189 | Wang 2020          | CXCR2 antagonism promotes oligodendrocyte precursor cell differentiation and enhances remyelination in a mouse model of multiple sclerosis.                          | Animal study |

|     |                  |                                                                                                                                                                                                |              |
|-----|------------------|------------------------------------------------------------------------------------------------------------------------------------------------------------------------------------------------|--------------|
| 190 | Wasko 2019       | Systemic TLR2 tolerance enhances central nervous system remyelination.                                                                                                                         | Animal study |
| 191 | Way 2015         | Pharmaceutical integrated stress response enhancement protects oligodendrocytes and provides a potential multiple sclerosis therapeutic.                                                       | Animal study |
| 192 | WiesMancini 2019 | Microglial modulation through colony-stimulating factor-1 receptor inhibition attenuates demyelination.                                                                                        | Animal study |
| 193 | Williams 2014    | Targeting CXCR7/ACKR3 as a therapeutic strategy to promote remyelination in the adult central nervous system.                                                                                  | Animal study |
| 194 | Wootla 2015      | A single dose of a neuron-binding human monoclonal antibody improves brainstem NAA concentrations, a biomarker for density of spinal cord axons, in a model of progressive multiple sclerosis. | Animal study |
| 195 | Wootla 2016      | Antibody-Mediated Oligodendrocyte Remyelination Promotes Axon Health in Progressive Demyelinating Disease.                                                                                     | Animal study |
| 196 | Wootla 2016      | A monoclonal natural human IgM protects axons in the absence of remyelination.                                                                                                                 | Animal study |
| 197 | Wu 2019          | Multiple functional therapeutic effects of DL-3-n-butylphthalide in the cuprizone model of demyelination.                                                                                      | Animal study |
| 198 | Xu 2016          | Discovery of CNS Penetrant CXCR2 Antagonists for the Potential Treatment of CNS Demyelinating Disorders.                                                                                       | Animal study |
| 199 | Yamamoto 2014    | Cyclic phosphatidic acid treatment suppresses cuprizone-induced demyelination and motor dysfunction in mice.                                                                                   | Animal study |
| 200 | Yamamoto 2017    | Protective and therapeutic role of 2-carba-cyclic phosphatidic acid in demyelinating disease.                                                                                                  | Animal study |
| 201 | Yao 2016         | Clobetasol promotes remyelination in a mouse model of neuromyelitis optica.                                                                                                                    | Animal study |
| 202 | Yazdi 2015       | Enhanced remyelination following lysolecithin-induced demyelination in mice under treatment with fingolimod (FTY720).                                                                          | Animal study |
| 203 | Yazdi 2018       | Fingolimod Enhances Oligodendrocyte Differentiation of Transplanted Human Induced Pluripotent Stem Cell-Derived Neural Progenitors.                                                            | Animal study |
| 204 | Youssef 2019     | LINGO-1 siRNA nanoparticles promote central remyelination in ethidium bromide-induced demyelination in rats.                                                                                   | Animal study |
| 205 | Yu 2018          | N-Phenylquinazolin-2-amine Yhhu4952 as a novel promotor for oligodendrocyte differentiation and myelination.                                                                                   | Animal study |
| 206 | Yu 2018          | Prednisone alleviates demyelination through regulation of the NLRP3 inflammasome in a C57BL/6 mouse model of cuprizone-induced demyelination.                                                  | Animal study |
| 207 | Zahednasab 2019  | The protective effect of rifampicin on behavioral deficits, biochemical, and neuropathological changes in a cuprizone model of demyelination.                                                  | Animal study |
| 208 | Zendedel 2016    | Regulatory effect of triiodothyronine on brain myelination and astrogliosis after cuprizone-induced demyelination in mice.                                                                     | Animal study |
| 209 | Zhai 2015        | Blocking GluR2-GAPDH ameliorates experimental autoimmune encephalomyelitis.                                                                                                                    | Animal study |

|     |            |                                                                                                                                                                               |              |
|-----|------------|-------------------------------------------------------------------------------------------------------------------------------------------------------------------------------|--------------|
| 210 | Zhang 2015 | Inhibition of LINGO-1 promotes functional recovery after experimental spinal cord demyelination                                                                               | Animal study |
| 211 | Zhang 2015 | Thyroid hormone alleviates demyelination induced by cuprizone through its role in remyelination during the remission period.                                                  | Animal study |
| 212 | Zhang 2016 | Myricetin alleviates cuprizone-induced behavioral dysfunction and demyelination in mice by Nrf2 pathway.                                                                      | Animal study |
| 213 | Zhang 2016 | Thymosin beta4 promotes oligodendrogenesis in the demyelinating central nervous system.                                                                                       | Animal study |
| 214 | Zhang 2016 | Treatment of multiple sclerosis by transplantation of neural stem cells derived from induced pluripotent stem cells.                                                          | Animal study |
| 215 | Zhang 2017 | Icariin enhances remyelination process after acute demyelination induced by cuprizone exposure                                                                                | Animal study |
| 216 | Zhang 2018 | Adenosine Promotes the Recovery of Mice from the Cuprizone-Induced Behavioral and Morphological Changes while Effecting on Microglia and Inflammatory Cytokines in the Brain. | Animal study |
| 217 | Zhang 2019 | MiR-146a promotes oligodendrocyte progenitor cell differentiation and enhances remyelination in a model of experimental autoimmune encephalomyelitis.                         | Animal study |
| 218 | Zhang 2019 | Venlafaxine improves the cognitive impairment and depression-like behaviors in a cuprizone mouse model by alleviating demyelination and neuroinflammation in the brain        | Animal study |
| 219 | Zhou 2015  | 18beta-glycyrrhetic acid suppresses experimental autoimmune encephalomyelitis through inhibition of microglia activation and promotion of remyelination                       | Animal study |
| 220 | Zhu 2016   | Electroacupuncture Promotes Remyelination after Cuprizone Treatment by Enhancing Myelin Debris Clearance.                                                                     | Animal study |
| 221 | Zhu 2019   | Repurposing of omeprazole for oligodendrocyte differentiation and remyelination                                                                                               | Animal study |



**Table S4. Summary of reported in vivo study designs to assess neuroprotective and/or regenerative interventions for MS.**

| Study Design                  | Number | Description                                                                                                                                                                                                                                                                                                                                                                                                                                                                                                                                                                                                                                                                                                                       |
|-------------------------------|--------|-----------------------------------------------------------------------------------------------------------------------------------------------------------------------------------------------------------------------------------------------------------------------------------------------------------------------------------------------------------------------------------------------------------------------------------------------------------------------------------------------------------------------------------------------------------------------------------------------------------------------------------------------------------------------------------------------------------------------------------|
| Clinical Study                | 4      | An observational assessment of an intervention in human subjects using various sources of data (e.g. retrospective cohort analyses, longitudinal studies, sub-analyses of samples or data collected in clinical trials).                                                                                                                                                                                                                                                                                                                                                                                                                                                                                                          |
| Clinical Trial                | 15     | An assessment of an intervention in human subjects within a controlled trial to determine the safety and efficacy of the intervention for a specified indication. The goal is to produce evidence that an intervention improves outcomes to a greater degree than current options or addresses a different therapeutic need.                                                                                                                                                                                                                                                                                                                                                                                                      |
| Phase 0                       | 3      | Also called pilot trials. Phase 0 trials are first-in-human, short-term and exploratory trials of a low dose given to a very small cohort (10 – 15 participants) to determine the safety, pharmacokinetics and preliminary performance of an intervention.                                                                                                                                                                                                                                                                                                                                                                                                                                                                        |
| Phase I                       | 3      | A trial with a small cohort of healthy participants (20 – 50), or participants within the target population with no underlying health conditions, to determine the tolerable and safe range of dosing, as well as any unexpected and/or serious side effects.                                                                                                                                                                                                                                                                                                                                                                                                                                                                     |
| Phase II                      | 8      | A longer-term trial with a larger cohort (50 – 100+) to determine the efficacy of the determined safe dose among the target population, while assessing side effects. The intervention may be given adjunct to current treatments.                                                                                                                                                                                                                                                                                                                                                                                                                                                                                                |
| Phase III                     | 0      | A large cohort trial (100 – 1000+) over multiple years designed to compare the safety, tolerability and effectiveness of an intervention to a current standard of care or similar intervention within the target population. Interventions with successful outcomes in phase III are considered for regulatory approval.                                                                                                                                                                                                                                                                                                                                                                                                          |
| Phase IV                      | 1      | A trial for post-approval interventions to assess long term efficacy, account for variability in performance among a population with greater diversity and/or the utility of the intervention in treating a different symptomatic or pathological aspect of a condition.                                                                                                                                                                                                                                                                                                                                                                                                                                                          |
| Animal Model                  | 250    | A preclinical assessment of the efficacy and potential therapeutic applications of an intervention in animal subjects with a disease or condition that mimics one or more aspects of the pathology of MS. Animal models of MS generally fall into two primary groups: 1. Immune-mediated, which best reflects the systemic and neuroinflammatory aspects of MS (EAE and viral models) or 2. Chemically induced, which best reflects the neurodegenerative and regenerative aspects of MS (Cuprizone, LPC and EtBr models).                                                                                                                                                                                                        |
| Cuprizone                     | 123    | Cuprizone is a copper chelating agent that selectively stresses and causes apoptosis of susceptible myelinating oligodendrocytes within particular areas of the brain in laboratory rodents. Short-term or long-term administration of cuprizone in the diet leads to acute or chronic demyelination, respectively, along with activation of glial cells. Cessation of the cuprizone diet leads to remyelination that proceeds in a consistent spatiotemporal pattern. Demyelination in this model occurs with minimal peripheral immune cell infiltration and contribution to damage, which enables the assessment of neuroregenerative strategies while controlling for potential indirect effects through peripheral immunity. |
| Lysophosphatidylcholine (LPC) | 37     | LPC, also called lysolethicin, is a phospholipid activator of phospholipase A2 that is injected directly into a predetermined site of the CNS to produce a focal demyelinated area. Demyelination occurs immediately and proceeds along a highly reproducible timeline, followed by spontaneous remyelination. The toxic LPC model is mediated primarily by direct chemical disruption of the myelin sheath and the action of local activated glial cells, with minimal peripheral inflammation and infiltration of the lesion.                                                                                                                                                                                                   |

|                                                 |    |                                                                                                                                                                                                                                                                                                                                                                                                                                                                                                                                                                                                                                                                                                                                                        |
|-------------------------------------------------|----|--------------------------------------------------------------------------------------------------------------------------------------------------------------------------------------------------------------------------------------------------------------------------------------------------------------------------------------------------------------------------------------------------------------------------------------------------------------------------------------------------------------------------------------------------------------------------------------------------------------------------------------------------------------------------------------------------------------------------------------------------------|
| Ethidium bromide (EtBr)                         | 10 | Ethidium bromide is a DNA intercalating agent used to induce focal demyelinated areas with minimal systemic inflammation. EtBr destroys glial cells, and especially their highly proliferative precursors, by compromising DNA replication. EtBr causes nonspecific apoptosis within the injection site and subsequent demyelination and remyelination of the lesion.                                                                                                                                                                                                                                                                                                                                                                                  |
| Experimental Autoimmune Encephalomyelitis (EAE) | 66 | An MS-like disease most often induced in rodents, wherein immunization with myelin antigens generates an autoimmune response to the CNS. Infiltrating myelin-reactive immune cells mediate both direct and indirect damage to the myelin sheath, which prompts widespread demyelination and clinically measurable neurological deficits, most notably an ascending paralysis.                                                                                                                                                                                                                                                                                                                                                                          |
| Active induction                                | 59 | Active EAE is generated by immunizing animals with myelin peptide or protein (i.e. MOG, PLP, or MBP) combined with an adjuvant, in order to elicit a CNS-directed and predominantly CD4 <sup>+</sup> T cell mediated autoimmune response. Priming of the adaptive immune response occurs in the periphery, followed by lymphocyte migration and infiltration of the CNS (which may be aided by administering blood-brain barrier permeating agents) and secondary recruitment and activation of local and infiltrating cells that go on to demyelinate axons. The clinical phenotype of the model depends on the genetic strain of laboratory rodent and the immunizing antigen. The following five rows describe the antigens reported to induce EAE. |
| MOG <sub>35-55</sub>                            | 42 | Myelin oligodendrocyte glycoprotein (MOG) peptide segment 35-55 is the most commonly used antigen to actively induce CD4 <sup>+</sup> T cell-dependent disease in a variety of susceptible rodent strains. MOG <sub>35-55</sub> induced EAE in C57Bl/6 mice generates a chronic progressive or monophasic clinical course, whereas in NOD mice, induction results in a chronic relapsing disease.                                                                                                                                                                                                                                                                                                                                                      |
| MOG protein                                     | 3  | MOG protein induced EAE in C57Bl/6 mice produces a similar clinical phenotype as MOG <sub>35-55</sub> immunization but with differential activation and involvement of adaptive immune cells in disease pathology. Full length recombinant MOG protein contains multiple encephalitogenic determinants as well as conformational epitopes that generate greater numbers of infiltrating MOG-reactive B cells that can present antigen and produce autoantibodies. Inflammatory B cells can be therapeutically depleted in this model, similar to human MS.                                                                                                                                                                                             |
| PLP <sub>139-151</sub>                          | 8  | Proteolipid protein (PLP) peptide segment 139-151 is commonly used to immunize the SJL mouse strain. The SJL-PLP model is characterized by relapsing clinical paralysis, epitope spreading and female sex bias, similar to RRMS, which makes the model well suited for testing interventions that exert differential sex-based effects or that temporally target episodes of symptom onset and remission.                                                                                                                                                                                                                                                                                                                                              |
| MP4                                             | 1  | MP4 is a chimeric fusion protein of PLP and myelin basic protein (MBP). MP4 immunization in SJL mice, which are susceptible to EAE induced with both antigens individually, produces a relapsing remitting clinical course. Similar to MOG protein, MP4 immunization generates a B cell and autoantibody dependent disease in C57Bl/6 mice and results in CNS lesions with histological features more consistent with MS than MOG <sub>35-55</sub> EAE.                                                                                                                                                                                                                                                                                                |
| SC homogenate                                   | 5  | Whole spinal cord (SC) homogenate was the first preparation used to generate EAE in rodents. SC homogenate is used to actively immunize recipients indiscriminately with multiple myelin and non-myelin antigens, resulting in broad immune activation and varying clinical courses depending on the donor and recipient species. Immunization with SC homogenate may not require the inclusion of an adjuvant in some rat strains.                                                                                                                                                                                                                                                                                                                    |
| Focal induction                                 | 2  | Also called targeted EAE. The model involves the generation of reproducible, localized lesions in actively immunized EAE mice. A predetermined site in the CNS of an EAE mouse is injected with interferon- $\gamma$ and tumor necrosis factor- $\alpha$                                                                                                                                                                                                                                                                                                                                                                                                                                                                                               |

|                     |     |                                                                                                                                                                                                                                                                                                                                                                                                                                                                                                                                                                                                                                                                                                                                                                         |
|---------------------|-----|-------------------------------------------------------------------------------------------------------------------------------------------------------------------------------------------------------------------------------------------------------------------------------------------------------------------------------------------------------------------------------------------------------------------------------------------------------------------------------------------------------------------------------------------------------------------------------------------------------------------------------------------------------------------------------------------------------------------------------------------------------------------------|
|                     |     | to preferentially 'target' peripherally activated leukocytes to a single lesion. Focal induction limits the pathology to specific areas, including those that may be less commonly affected by regular induction protocols.                                                                                                                                                                                                                                                                                                                                                                                                                                                                                                                                             |
| Passive induction   | 5   | Passive EAE is induced by the adoptive transfer of ex vivo stimulated and expanded myelin reactive CD4 <sup>+</sup> T cells, isolated from the peripheral lymphoid organs of actively induced donors. T cell transfer to a naïve, genetically matched recipient results in a disease with the same clinical and immunopathological characteristics as the actively induced donor, but that bypasses the initial priming step. The resulting disease tends to onset more consistently between animals, with greater symptom severity and incidence. Passive induction is helpful for differentiating the effects of an intervention on the initial priming of the autoimmune response versus the effects on leukocyte migration and CNS-localized pathogenic mechanisms. |
| Viral Demyelination | 11  | Chronic CNS demyelination results from intracranial inoculation with a neurotropic viral strain and the subsequent immune response to infection. Viral demyelination models are similar to EAE models in that peripheral immune cells infiltrate the CNS and damage myelin. The site of the initial trigger, however, is within the CNS in viral models, and demyelination occurs secondarily to axonal damage (inside-out mechanism); unlike EAE, in which disease is initiated in the periphery and occurs by primary demyelination that results in axonal damage (outside-in mechanism).                                                                                                                                                                             |
| TMEV                | 8   | Theiler's encephalomyelitis virus (TMEV) is a (+)ssRNA <i>picornavirus</i> that, when inoculated directly into the CNS, generates acute encephalitis followed by lymphocyte and macrophage infiltration and incomplete viral clearance. The establishment of persistent infection within glial cells and macrophages of genetically susceptible mice (i.e. SJL) is determined by the expression of specific MHC alleles. Infected susceptible mice exhibit late-onset, chronic inflammatory demyelination resulting from neuro-epitope spreading.                                                                                                                                                                                                                       |
| MHV                 | 3   | Mouse hepatitis virus (MHV) is a (+)ssRNA coronavirus that produces axonal damage and chronic demyelination throughout the CNS after intracranial inoculation. Similar to the TMEV model, demyelination is a result of incomplete clearance by infiltrating peripheral immune cells responding to infection. The neurotropic demyelinating strains A59 and JHMV are most commonly used to model clinical and histopathological aspects of MS.                                                                                                                                                                                                                                                                                                                           |
| Other               | 3   |                                                                                                                                                                                                                                                                                                                                                                                                                                                                                                                                                                                                                                                                                                                                                                         |
| NMO                 | 1   | An intracerebral injection of anti-aquaporin antibody (AQP4-IgG) and human complement that produces robust neuromyelitis optica (NMO) pathology with demyelination of the brain and minimal axonal injury.                                                                                                                                                                                                                                                                                                                                                                                                                                                                                                                                                              |
| PTZ                 | 1   | Pentylentetrazol (PTZ) is a CNS penetrant and potent GABA receptor antagonist that produces extensive epileptogenic activity in the brain. PTZ administration is used as a model of epileptic seizure and has been shown to result in autoantibody-mediated axonal demyelination in rodents.                                                                                                                                                                                                                                                                                                                                                                                                                                                                            |
| Optic Nerve Injury  | 1   | A mechanical injury model in which the optic nerve is surgically damaged, by forceps or a haemostat, at a specified site behind the eye.                                                                                                                                                                                                                                                                                                                                                                                                                                                                                                                                                                                                                                |
| Total               | 269 |                                                                                                                                                                                                                                                                                                                                                                                                                                                                                                                                                                                                                                                                                                                                                                         |

**Tables S5 (A–L). Structural, mechanistic and regulatory overview of interventions reported to provide neuroprotection and/or promote neuroregeneration in preclinical or clinical studies of MS.** Structures, mechanisms, biological effects and approved indications were sourced from the respectively listed data base accession numbers and reviewed articles, as well as FDA drug approval databases and ClinicalTrials.gov, unless otherwise cited with an external reference. To provide a summary of the data, interventions were grouped into a single classification even if there are multiple pharmacological actions. Information presented in these tables is not an exhaustive list.

**Table S5A. Small molecule receptor agonists and antagonists**

| Name                                                                           | Structure                                                                                                                                              | Mechanism(s) of action                                                                                                                                                                                                                                                                                                         | Biological effect(s)                                                                                         | FDA approved indication(s)                                                                    | Accession number |             | Article Number |
|--------------------------------------------------------------------------------|--------------------------------------------------------------------------------------------------------------------------------------------------------|--------------------------------------------------------------------------------------------------------------------------------------------------------------------------------------------------------------------------------------------------------------------------------------------------------------------------------|--------------------------------------------------------------------------------------------------------------|-----------------------------------------------------------------------------------------------|------------------|-------------|----------------|
|                                                                                |                                                                                                                                                        |                                                                                                                                                                                                                                                                                                                                |                                                                                                              |                                                                                               | DrugBank         | PubChem CID |                |
| $\Delta$ 9-tetrahydrocannabinol-botanical drug substance ( $\Delta$ 9-THC-BDS) | <ul style="list-style-type: none"> <li>Phytocannabinoid</li> <li>Also called Dronabinol</li> <li><math>C_{21}H_{30}O_2</math></li> </ul>               | Partial agonist at the cannabinoid receptors CB1 and CB2                                                                                                                                                                                                                                                                       | <ul style="list-style-type: none"> <li>Psychoactive</li> <li>Anti-nauseant</li> <li>Analgesic</li> </ul>     | Disease-related nausea and weight loss                                                        | DB00470          | 16078       | 47             |
| 2-arachidonoyl-glycerol (2-AG)                                                 | <ul style="list-style-type: none"> <li>Endocannabinoid fatty acid</li> <li><math>C_{23}H_{38}O_4</math></li> </ul>                                     | <ul style="list-style-type: none"> <li>Endogenous ligand for CB1 and CB2 receptors</li> <li>Mimics several effects of <math>\Delta</math>9-THC</li> </ul>                                                                                                                                                                      | <ul style="list-style-type: none"> <li>Anti-inflammatory</li> <li>Neuroregulatory</li> </ul>                 | -                                                                                             | -                | 5282280     | 113            |
| 2-carba-cyclic phosphatidic acid (2ccPA)                                       | Synthetic cPA derivative "in which the phosphate oxygen was replaced with a methylene group at the sn-2 position"                                      | <ul style="list-style-type: none"> <li>"Metabolically stabilized cPA derivative that showed much more potent biological activity than natural cPA"</li> <li>Potentially blood-brain barrier permeable</li> <li>Induces signalling similar to NGF, which "promotes neurite outgrowth and enhances neuronal survival"</li> </ul> | <ul style="list-style-type: none"> <li>Neuroprotective</li> <li>Anti-inflammatory</li> </ul>                 | -                                                                                             | -                | -           | 200            |
| Adenosine                                                                      | <ul style="list-style-type: none"> <li>Nucleoside composed of adenine and d-ribose</li> <li><math>C_{10}H_{13}N_5O_4</math></li> </ul>                 | <ul style="list-style-type: none"> <li>DNA and RNA nucleoside</li> <li>Potent neuron-glia neurotransmitter</li> <li>Induces OPC differentiation</li> <li>Promotes formation of myelin</li> </ul>                                                                                                                               | <ul style="list-style-type: none"> <li>Neuromodulatory</li> <li>Antihypertensive</li> </ul>                  | <ul style="list-style-type: none"> <li>Tachycardia</li> <li>Pulmonary hypertension</li> </ul> | DB00640          | 60961       | 216            |
| AL-8810 <sup>12</sup>                                                          | <ul style="list-style-type: none"> <li>11<math>\beta</math>-fluoro analog of PGF2<math>\alpha</math></li> <li><math>C_{24}H_{31}FO_4</math></li> </ul> | Potent and selective prostaglandin F2alpha FP receptor antagonist                                                                                                                                                                                                                                                              | Neuroprotective                                                                                              | -                                                                                             | -                | 5311238     | 75             |
| Amitriptyline                                                                  | <ul style="list-style-type: none"> <li>Derivative of dibenzocycloheptadiene</li> <li><math>C_{20}H_{23}N</math></li> </ul>                             | <ul style="list-style-type: none"> <li>Tricyclic antidepressant (SNRI)</li> <li>Mechanism not fully described</li> <li>Inhibits lysosomal enzyme acid sphingomyelinase</li> </ul>                                                                                                                                              | <ul style="list-style-type: none"> <li>Antidepressant</li> <li>Analgesic</li> <li>Anticholinergic</li> </ul> | <ul style="list-style-type: none"> <li>Depression</li> <li>Neuropathic pain</li> </ul>        | DB00321          | 2160        | 27             |

|                                                |                                                                                                                                                                                                                    |                                                                                                                                                                                                                                                                                                                                                                                                            |                                                                                                                                                                                                                                  |                                                                                                      |         |         |          |
|------------------------------------------------|--------------------------------------------------------------------------------------------------------------------------------------------------------------------------------------------------------------------|------------------------------------------------------------------------------------------------------------------------------------------------------------------------------------------------------------------------------------------------------------------------------------------------------------------------------------------------------------------------------------------------------------|----------------------------------------------------------------------------------------------------------------------------------------------------------------------------------------------------------------------------------|------------------------------------------------------------------------------------------------------|---------|---------|----------|
| Bazedoxifene                                   | <ul style="list-style-type: none"> <li>Indole derivative</li> <li>C<sub>30</sub>H<sub>34</sub>N<sub>2</sub>O<sub>3</sub></li> </ul>                                                                                | <ul style="list-style-type: none"> <li>Tissue-dependent selective modulator of both nuclear estrogen receptors</li> <li>Reduces bone resorption</li> </ul>                                                                                                                                                                                                                                                 | Hormonal/ endocrine                                                                                                                                                                                                              | Postmenopausal osteoporosis                                                                          | DB06401 | 154257  | 151      |
| Benztropine                                    | <ul style="list-style-type: none"> <li>3<math>\alpha</math>-diphenyl-methoxytropane</li> <li>C<sub>21</sub>H<sub>25</sub>NO</li> </ul>                                                                             | <ul style="list-style-type: none"> <li>Inhibitor of presynaptic carrier-mediated dopamine transport and reuptake</li> <li>Muscarinic receptor antagonist</li> </ul>                                                                                                                                                                                                                                        | <ul style="list-style-type: none"> <li>Dopaminergic</li> <li>Antimuscarinic</li> <li>Antihistaminic</li> </ul>                                                                                                                   | Parkinsonism                                                                                         | DB00245 | 1201549 | 125, 181 |
| Bicuculline                                    | <ul style="list-style-type: none"> <li>Benzylisoquinoline alkaloid</li> <li>C<sub>20</sub>H<sub>17</sub>NO<sub>6</sub></li> </ul>                                                                                  | <ul style="list-style-type: none"> <li>Competitive antagonist of GABA A receptor</li> <li>Enhances BDNF expression in the hippocampus</li> </ul>                                                                                                                                                                                                                                                           | Neuroregulatory                                                                                                                                                                                                                  | -                                                                                                    | DB11562 | 10237   | 121      |
| Bilobalide                                     | <ul style="list-style-type: none"> <li>Sesquiterpene trilactone</li> <li>C<sub>15</sub>H<sub>18</sub>O<sub>8</sub></li> </ul>                                                                                      | <ul style="list-style-type: none"> <li>Main component of <i>Ginkgo biloba</i> extract</li> <li>Negative allosteric modulator at the GABAA and GABAA-rho receptors</li> <li>Free radical scavenger</li> <li>Reduces platelet aggregation and improves circulation</li> </ul>                                                                                                                                | <ul style="list-style-type: none"> <li>Neuroprotective</li> <li>Anti-inflammatory</li> <li>Antioxidant</li> <li>Circulatory</li> </ul>                                                                                           | -                                                                                                    | DB01381 | 73581   | 173      |
| BN52021 (Ginkgolide B) <sup>13</sup>           | <ul style="list-style-type: none"> <li>Diterpenoid trilactone</li> <li>C<sub>20</sub>H<sub>24</sub>O<sub>10</sub></li> </ul>                                                                                       | <ul style="list-style-type: none"> <li>Antagonist of GABAA and platelet-activating factor receptors</li> <li>Reduces platelet aggregation and improves circulation</li> <li>Protects against hypoxia-induced neuronal injury</li> </ul>                                                                                                                                                                    | <ul style="list-style-type: none"> <li>Neuroprotective</li> <li>Anti-inflammatory</li> <li>Antioxidant</li> <li>Circulatory</li> </ul>                                                                                           | -                                                                                                    | DB06744 | 65243   | 15       |
| BNN27                                          | <ul style="list-style-type: none"> <li>Novel synthetic microneurotrophin</li> <li>Member of a chemical library of C17-spiroepoxy derivatives of DHEA</li> <li>C<sub>21</sub>H<sub>32</sub>O<sub>3</sub></li> </ul> | <ul style="list-style-type: none"> <li>Blood-brain barrier permeable analog of DHEA</li> <li>Promotes neuron survival by activating the NGF receptors</li> </ul>                                                                                                                                                                                                                                           | <ul style="list-style-type: none"> <li>Neuroprotective</li> <li>Neurogenic</li> </ul>                                                                                                                                            | -                                                                                                    | -       | -       | 20       |
| Cannabidiol-botanical drug substance (CBD-BDS) | <ul style="list-style-type: none"> <li>Phytocannabinoid</li> <li>C<sub>21</sub>H<sub>30</sub>O<sub>2</sub></li> </ul>                                                                                              | <ul style="list-style-type: none"> <li>Partial agonist at the cannabinoid receptors CB1 and CB2</li> <li>Activates 5-HT1A/2A/3A serotonergic and TRPV1–2 vanilloid receptors, antagonizes alpha-1 adrenergic and <math>\mu</math>-opioid receptors</li> <li>Inhibits reuptake of noradrenaline, dopamine, serotonin, GABA and anandamide</li> <li>Blocks low-voltage-activated calcium channels</li> </ul> | <ul style="list-style-type: none"> <li>Analgesic</li> <li>Anticonvulsant</li> <li>Muscle relaxant</li> <li>Anxiolytic</li> <li>Antipsychotic</li> <li>Neuroprotective</li> <li>Anti-inflammatory</li> <li>Antioxidant</li> </ul> | <ul style="list-style-type: none"> <li>Epilepsy</li> <li>Neuropathic pain (Health Canada)</li> </ul> | DB09061 | 644019  | 47       |
| CCX771                                         | <ul style="list-style-type: none"> <li>Synthetic</li> <li>Structure not available</li> <li>Proprietary compound patented by ChemoCentryx</li> </ul>                                                                | <ul style="list-style-type: none"> <li>Atypical chemokine receptor CXCR7 (ACKR3) antagonist</li> <li>CXCR7 is expressed on immune cells and in the CNS</li> <li>CXCR7 mediates activation of CXCR4 during neural and glial precursor differentiation</li> </ul>                                                                                                                                            | Immunomodulatory                                                                                                                                                                                                                 | -                                                                                                    | -       | -       | 193      |
| Clemastine fumarate                            | <ul style="list-style-type: none"> <li>Ethanolamine derivative</li> <li>C<sub>21</sub>H<sub>26</sub>ClNO.C<sub>4</sub>H<sub>4</sub>O<sub>4</sub></li> </ul>                                                        | <ul style="list-style-type: none"> <li>Selective histamine H1 receptor antagonist</li> <li>Blocks the action of endogenous histamine</li> </ul>                                                                                                                                                                                                                                                            | <ul style="list-style-type: none"> <li>Antihistamine</li> <li>Anticholinergic</li> <li>Sedative</li> </ul>                                                                                                                       | Allergic symptoms                                                                                    | DB00283 | 5281069 | 59, 76   |
| Clobetasol                                     | <ul style="list-style-type: none"> <li>Corticosteroid</li> <li>C<sub>22</sub>H<sub>28</sub>ClFO<sub>4</sub></li> </ul>                                                                                             | <ul style="list-style-type: none"> <li>Corticosteroid hormone receptor agonist that modulates glucocorticoid receptor signaling</li> <li>Promotes Schwann-cell-mediated myelination of peripheral nerves</li> </ul>                                                                                                                                                                                        | Anti-inflammatory                                                                                                                                                                                                                | Inflammatory skin disorders                                                                          | DB11750 | 5311051 | 125, 201 |

|                           |                                                                                                                                                                |                                                                                                                                                                                                                                                                                                                                                                                          |                                                                                                                 |                                                                                                |         |           |                                                 |  |
|---------------------------|----------------------------------------------------------------------------------------------------------------------------------------------------------------|------------------------------------------------------------------------------------------------------------------------------------------------------------------------------------------------------------------------------------------------------------------------------------------------------------------------------------------------------------------------------------------|-----------------------------------------------------------------------------------------------------------------|------------------------------------------------------------------------------------------------|---------|-----------|-------------------------------------------------|--|
|                           |                                                                                                                                                                | <ul style="list-style-type: none"> <li>Stimulates OPC proliferation and differentiation</li> <li>Blood-brain barrier permeable</li> </ul>                                                                                                                                                                                                                                                |                                                                                                                 |                                                                                                |         |           |                                                 |  |
| Clozapine                 | <ul style="list-style-type: none"> <li>Tricyclic dibenzodiazepine</li> <li>C<sub>18</sub>H<sub>19</sub>ClN<sub>4</sub></li> </ul>                              | <ul style="list-style-type: none"> <li>Blood-brain barrier permeable</li> <li>Serotonin 5-HT 2A/2C receptor antagonist</li> <li>Antagonizes several dopamine receptors but only weak antagonism at the dopamine D2 receptor</li> </ul>                                                                                                                                                   | <ul style="list-style-type: none"> <li>Atypical antipsychotic</li> <li>Anti-inflammatory</li> </ul>             | <ul style="list-style-type: none"> <li>Schizophrenia</li> <li>Advanced parkinsonism</li> </ul> | DB00363 | 135398737 | 179                                             |  |
| CYM5442                   | <ul style="list-style-type: none"> <li>Sphingosine-like fungal metabolite</li> <li>C<sub>23</sub>H<sub>27</sub>N<sub>3</sub>O<sub>4</sub></li> </ul>           | Short-lived sphingosine 1-phosphate receptor-specific modulator                                                                                                                                                                                                                                                                                                                          | Immunosuppressant                                                                                               | -                                                                                              | -       | 25110406  | 88                                              |  |
| Diarylpropionitrile (DPN) | <ul style="list-style-type: none"> <li>Acetonitrile</li> <li>C<sub>15</sub>H<sub>13</sub>NO<sub>2</sub></li> </ul>                                             | <ul style="list-style-type: none"> <li>Synthetic, nonsteroidal and highly selective estrogen receptor β agonist</li> <li>Lacks anti-inflammatory effects</li> </ul>                                                                                                                                                                                                                      | Neuroprotective                                                                                                 | -                                                                                              | -       | 102614    | 119, 185                                        |  |
| Dimethyl fumarate (DMF)   | <ul style="list-style-type: none"> <li>Orally bioavailable methyl ester of fumaric acid</li> <li>C<sub>6</sub>H<sub>8</sub>O<sub>4</sub></li> </ul>            | <ul style="list-style-type: none"> <li>Metabolized to active monomethyl fumarate (MMF)</li> <li>MMF up-regulates the Nrf2 pathway that is activated following oxidative stress</li> <li>MMF is an agonist of the nicotinic acid receptor</li> <li>(92) Delivered in DMF-O-solid lipoidal nanoparticles</li> </ul>                                                                        | Anti-inflammatory                                                                                               | RRMS                                                                                           | DB08908 | 637568    | 25, 92                                          |  |
| ER beta ligand (AC186)    | <ul style="list-style-type: none"> <li>Nonsteroidal agonist</li> <li>C<sub>18</sub>H<sub>17</sub>F<sub>3</sub>O</li> </ul>                                     | Potent and selective ERβ agonist similar to DPN                                                                                                                                                                                                                                                                                                                                          | Neuroprotective                                                                                                 | -                                                                                              | -       | 71245042  | 74                                              |  |
| FTY720 (Fingolimod)       | <ul style="list-style-type: none"> <li>Orally available aminodiol</li> <li>Derivate of myriocin</li> <li>C<sub>19</sub>H<sub>33</sub>NO<sub>2</sub></li> </ul> | <ul style="list-style-type: none"> <li>Non-selective sphingosine 1-phosphate receptor modulator</li> <li>Blocks T cell egress from lymph nodes and subsequent migration to the CNS</li> </ul>                                                                                                                                                                                            | Immunosuppressive                                                                                               | <ul style="list-style-type: none"> <li>CIS</li> <li>RRMS</li> <li>SPMS</li> </ul>              | DB08868 | 107969    | 5, 19, 57, 63, 88, 127, 133, 170, 177, 202, 203 |  |
| Genistein                 | <ul style="list-style-type: none"> <li>Isoflavone type of phytoestrogen</li> <li>C<sub>15</sub>H<sub>10</sub>O<sub>5</sub></li> </ul>                          | <ul style="list-style-type: none"> <li>Plant-derived compound abundant in soy</li> <li>Estrogen receptor β ligand</li> <li>Inhibits protein-tyrosine kinase and DNA topoisomerase-II activity (can induce cell cycle arrest)</li> </ul>                                                                                                                                                  | <ul style="list-style-type: none"> <li>Anti-cancer</li> <li>Anthelmintic</li> <li>Hormonal/endocrine</li> </ul> | Has completed multiple clinical trials for cancers                                             | DB01645 | 5280961   | 134                                             |  |
| GSK-239512 <sup>14</sup>  | <ul style="list-style-type: none"> <li>Structure reported in article</li> <li>C<sub>23</sub>H<sub>27</sub>N<sub>3</sub>O<sub>2</sub></li> </ul>                | <ul style="list-style-type: none"> <li>Potent and selective histamine 3 receptor antagonist</li> <li>Blood-brain barrier permeable</li> <li>"... selective H3 receptor antagonists has been shown to enhance the release of neurotransmitters such as histamine, acetylcholine, dopamine and norepinephrine, among others, which play important roles in cognitive processes"</li> </ul> | Cognitive                                                                                                       | Completed phase II clinical trial for RRMS (NCT01772199)                                       | DB15120 | 9976892   | 165                                             |  |
| GSK-247246 <sup>14</sup>  | Structure reported in article                                                                                                                                  | <ul style="list-style-type: none"> <li>Blood-brain barrier permeable H3R antagonist</li> <li>"... selective H3 receptor antagonists has been shown to enhance the release of neurotransmitters such as histamine, acetylcholine, dopamine and norepinephrine, among others, which play important roles in cognitive processes"</li> </ul>                                                | <ul style="list-style-type: none"> <li>Antihistamine</li> <li>Neuroregenerative</li> </ul>                      | -                                                                                              | -       | -         | 29                                              |  |

|                                              |                                                                                                                                                                     |                                                                                                                                                                                                                                                                                                                                          |                                                                                                                       |                                                                                        |         |           |         |
|----------------------------------------------|---------------------------------------------------------------------------------------------------------------------------------------------------------------------|------------------------------------------------------------------------------------------------------------------------------------------------------------------------------------------------------------------------------------------------------------------------------------------------------------------------------------------|-----------------------------------------------------------------------------------------------------------------------|----------------------------------------------------------------------------------------|---------|-----------|---------|
| Guanabenz                                    | <ul style="list-style-type: none"> <li>• 2,6-dichlorobenzylidene aminoguanidine acetate</li> <li>• C<sub>8</sub>H<sub>8</sub>Cl<sub>2</sub>N<sub>4</sub></li> </ul> | <ul style="list-style-type: none"> <li>• Selective α<sub>2</sub> adrenergic receptor agonist</li> <li>• “Guanabenz can also enhance protective ISR activity by inhibiting the binding of GADD34 to PP1, thereby inhibiting the dephosphorylation of p-eIF2α” expressed in mature oligodendrocytes</li> </ul>                             | Antihypertensive                                                                                                      | High blood pressure                                                                    | DB00629 | 5702063   | 191     |
| Iloprost                                     | <ul style="list-style-type: none"> <li>• Prostacyclin analogue</li> <li>• C<sub>22</sub>H<sub>32</sub>O<sub>4</sub></li> </ul>                                      | <ul style="list-style-type: none"> <li>• Binds to prostacyclin and prostaglandin EP1 receptors</li> <li>• Inhibits the ADP, thrombin, and collagen-induced aggregation of human platelets</li> <li>• Dilates systemic and pulmonary arterial vascular beds</li> </ul>                                                                    | <ul style="list-style-type: none"> <li>• Antihypertensive</li> <li>• Antidiuretic</li> </ul>                          | Pulmonary hypertension                                                                 | DB01088 | 5311181   | 123     |
| Indazole chloride                            | <ul style="list-style-type: none"> <li>• Phenylpyrazole</li> <li>• C<sub>13</sub>H<sub>9</sub>ClN<sub>2</sub>O<sub>2</sub></li> </ul>                               | Highly selective estrogen receptor β ligand                                                                                                                                                                                                                                                                                              | <ul style="list-style-type: none"> <li>• Anti-inflammatory</li> <li>• Neuroprotective</li> </ul>                      | -                                                                                      | -       | 122458206 | 6, 119  |
| JTE-013                                      | <ul style="list-style-type: none"> <li>• Pyrazolopyridine</li> <li>• C<sub>17</sub>H<sub>19</sub>N<sub>7</sub>OCl<sub>2</sub></li> </ul>                            | Selective S1P2 receptor antagonist in humans and rodents                                                                                                                                                                                                                                                                                 | Immunosuppressive                                                                                                     | -                                                                                      | -       | 10223146  | 167     |
| Laquinimod <sup>15</sup><br>(ABR-215062)     | <ul style="list-style-type: none"> <li>• Aromatic amide</li> <li>• C<sub>19</sub>H<sub>17</sub>ClN<sub>2</sub>O<sub>3</sub></li> </ul>                              | <ul style="list-style-type: none"> <li>• Proposed to reduce leukocyte migration to the CNS</li> <li>• Passively enters the CNS</li> <li>• Promotes remyelination in non-supportive environments by targeting NF-κB signalling in astrocytes and microglia</li> </ul>                                                                     | <ul style="list-style-type: none"> <li>• Immunomodulatory</li> <li>• Neuroprotective</li> </ul>                       | Completed phase III clinical trial for RRMS                                            | DB06685 | 54677946  | 90, 130 |
| Memantine hydrochloride                      | <ul style="list-style-type: none"> <li>• Primary aliphatic amine</li> <li>• C<sub>12</sub>H<sub>21</sub>N</li> </ul>                                                | <ul style="list-style-type: none"> <li>• Non-competitive N-methyl-D-aspartate (NMDA) receptor antagonist</li> <li>• NMDA antagonism decreases glutamate induced neuronal excitability and excessive stimulation that can lead to cellular dysfunction</li> </ul>                                                                         | <ul style="list-style-type: none"> <li>• Neuroregulatory</li> <li>• Dopaminergic</li> <li>• Antidepressant</li> </ul> | Alzheimer's disease-related dementia                                                   | DB01043 | 181458    | 172     |
| Methyl-prednisolone                          | <ul style="list-style-type: none"> <li>• Prednisolone derived glucocorticoid</li> <li>• C<sub>22</sub>H<sub>30</sub>O<sub>5</sub></li> </ul>                        | <ul style="list-style-type: none"> <li>• Higher potency than prednisone</li> <li>• Blood-brain barrier permeable</li> <li>• Decreases capillary permeability which inhibits leukocyte migration to sites of inflammation</li> <li>• Induces cell differentiation and stimulates apoptosis in sensitive tumor cell populations</li> </ul> | Immunomodulatory                                                                                                      | <ul style="list-style-type: none"> <li>• Multiple</li> <li>• Progressive MS</li> </ul> | DB00959 | 6741      | 152     |
| MK801<br>(Dizocilpine)                       | <ul style="list-style-type: none"> <li>• Organic tricyclic compound</li> <li>• C<sub>16</sub>H<sub>15</sub>N</li> </ul>                                             | <ul style="list-style-type: none"> <li>• Potent non-competitive N-methyl-D-aspartate receptor antagonist</li> <li>• NMDA antagonism decreases glutamate induced neuronal excitability and excessive stimulation that can lead to cellular dysfunction</li> </ul>                                                                         | <ul style="list-style-type: none"> <li>• Anticonvulsant</li> <li>• Anesthetic</li> </ul>                              | -                                                                                      | -       | 180081    | 172     |
| N-butyl-β-carboline-3-carboxylate<br>(β-CCB) | <ul style="list-style-type: none"> <li>• β-carboline</li> <li>• C<sub>16</sub>H<sub>16</sub>N<sub>2</sub>O<sub>2</sub></li> </ul>                                   | <ul style="list-style-type: none"> <li>• Stimulates GABAergic signaling in OPCs and myelinating oligodendrocytes</li> <li>• “the cellular mechanism involved in the effect of β-CCB remains unknown”</li> </ul>                                                                                                                          | Neurostimulatory                                                                                                      | -                                                                                      | -       | 128618    | 34      |
| Novel/<br>proprietary<br>compound 2          | <ul style="list-style-type: none"> <li>• Synthesis described in methods</li> <li>• Chemical structure reported in article 199</li> </ul>                            | <ul style="list-style-type: none"> <li>• Blood-brain barrier permeable CXCR2 antagonist that promotes OPC differentiation</li> <li>• CXCR2 is expressed by both inflammatory myeloid cells and oligodendrocytes in the CNS</li> <li>• CXCR2 involvement in MS remains unclear</li> </ul>                                                 | Immunomodulatory                                                                                                      | -                                                                                      | -       | -         | 189     |

|                                      |                                                                                                                                              |                                                                                                                                                                                                                                                                                                                                                     |                                                                                                                      |                                                                                           |         |         |     |
|--------------------------------------|----------------------------------------------------------------------------------------------------------------------------------------------|-----------------------------------------------------------------------------------------------------------------------------------------------------------------------------------------------------------------------------------------------------------------------------------------------------------------------------------------------------|----------------------------------------------------------------------------------------------------------------------|-------------------------------------------------------------------------------------------|---------|---------|-----|
| Novel/<br>proprietary<br>compound 22 | <ul style="list-style-type: none"> <li>Structure reported in article</li> <li>Based on urea</li> </ul>                                       | <ul style="list-style-type: none"> <li>CNS penetrant CXCR2 antagonist</li> <li>Chemokine receptor CXCR2 is expressed on OPCs and leukocytes</li> <li>CXCR2 regulates recruitment of immune cells to sites of injury and inflammation</li> </ul>                                                                                                     | Immunomodulatory                                                                                                     | -                                                                                         | -       | -       | 198 |
| Novel/<br>proprietary<br>compound 6a | <ul style="list-style-type: none"> <li>Arylpiperazine</li> <li>Structure reported in article</li> </ul>                                      | <ul style="list-style-type: none"> <li>Dopaminergic and serotonergic</li> <li>D2/5-HT 1A receptor ligand</li> </ul>                                                                                                                                                                                                                                 | <ul style="list-style-type: none"> <li>Neuroregulatory</li> <li>Anti-inflammatory</li> </ul>                         | -                                                                                         | -       | -       | 144 |
| Novel/<br>proprietary<br>compound 6b | <ul style="list-style-type: none"> <li>Arylpiperazine</li> <li>Structure reported in article</li> </ul>                                      | <ul style="list-style-type: none"> <li>Dopaminergic and serotonergic</li> <li>D2/5-HT 1A receptor ligand</li> </ul>                                                                                                                                                                                                                                 | <ul style="list-style-type: none"> <li>Neuroregulatory</li> <li>Anti-inflammatory</li> </ul>                         | -                                                                                         | -       | -       | 144 |
| Phenobarbitone sodium                | <ul style="list-style-type: none"> <li>Barbituric acid derivative</li> <li>C<sub>12</sub>H<sub>12</sub>N<sub>2</sub>O<sub>3</sub></li> </ul> | <ul style="list-style-type: none"> <li>Nonselective CNS depressant</li> <li>Binds GABAA receptor</li> <li>Blocks calcium channel and inhibits the release of excitatory transmitters</li> <li>Inhibits glutamate induced depolarizations</li> </ul>                                                                                                 | <ul style="list-style-type: none"> <li>Anticonvulsant</li> <li>Sedative-hypnotic</li> </ul>                          | Epileptic seizures                                                                        | DB01174 | 4763    | 55  |
| Pioglitazone                         | <ul style="list-style-type: none"> <li>Thiazolidinedione</li> <li>C<sub>19</sub>H<sub>20</sub>N<sub>2</sub>O<sub>3</sub>S</li> </ul>         | <ul style="list-style-type: none"> <li>Selective peroxisome proliferator-activated receptor-gamma (PPAR<math>\gamma</math>) agonist</li> <li>Modulates lipid and glucose metabolism</li> </ul>                                                                                                                                                      | Antihyperglycemic                                                                                                    | Type 2 diabetes mellitus                                                                  | DB01132 | 4829    | 4   |
| Pranlukast                           | <ul style="list-style-type: none"> <li>Chromone</li> <li>C<sub>27</sub>H<sub>23</sub>N<sub>5</sub>O<sub>4</sub></li> </ul>                   | <ul style="list-style-type: none"> <li>Antagonizes Gpr17 activity (GPCR downstream of Olig2)</li> <li>Cysteinyl leukotriene receptor-1 antagonist</li> <li>Reduces allergen-induced bronchospasm</li> </ul>                                                                                                                                         | <ul style="list-style-type: none"> <li>Anti-asthmatic</li> <li>Anti-inflammatory</li> <li>Neuroprotective</li> </ul> | Asthma (inhalant adjunct therapy)                                                         | DB01411 | 4887    | 138 |
| Prednisone                           | <ul style="list-style-type: none"> <li>Synthetic glucocorticoid</li> <li>C<sub>21</sub>H<sub>26</sub>O<sub>5</sub></li> </ul>                | <ul style="list-style-type: none"> <li>Promotes BDNF and NGF production</li> <li>Reduces the dilation and permeability of capillaries which inhibits leukocyte migration to sites of inflammation</li> <li>Binds the glucocorticoid receptor</li> <li>Inhibits phospholipase A2, NF-Kappa B and other inflammatory transcription factors</li> </ul> | <ul style="list-style-type: none"> <li>Anti-inflammatory</li> <li>Neuroprotective</li> </ul>                         | Multiple inflammatory conditions                                                          | DB00635 | 5865    | 206 |
| Probenecid                           | <ul style="list-style-type: none"> <li>Benzoic acid derivative</li> <li>C<sub>13</sub>H<sub>19</sub>NO<sub>4</sub>S</li> </ul>               | <ul style="list-style-type: none"> <li>Prototypical uricosuric agent</li> <li>Increase the excretion of uric acid by competitively inhibiting the tubular reabsorption of urate</li> <li>Pannexin-1 antagonist</li> </ul>                                                                                                                           | <ul style="list-style-type: none"> <li>Anti-inflammatory</li> <li>Antihyperuricemia</li> </ul>                       | <ul style="list-style-type: none"> <li>Gout</li> <li>Renal impairment</li> </ul>          | DB01032 | 4911    | 64  |
| Quetiapine fumarate                  | <ul style="list-style-type: none"> <li>Dibenzothiazepine</li> <li>C<sub>21</sub>H<sub>25</sub>N<sub>3</sub>O<sub>2</sub>S</li> </ul>         | <ul style="list-style-type: none"> <li>Dopamine type 2 (D2) and serotonin 2A (5HT2A) receptor antagonist</li> <li>Binds the norepinephrine transporter and other alpha-1, alpha-2 adrenergic and histamine H1 receptors</li> </ul>                                                                                                                  | Atypical antipsychotic                                                                                               | <ul style="list-style-type: none"> <li>Schizophrenia</li> <li>Bipolar disorder</li> </ul> | DB01224 | 5281025 | 55  |
| Smoothened agonist (SAG)             | <ul style="list-style-type: none"> <li>Benzothiophene</li> <li>C<sub>28</sub>H<sub>28</sub>ClN<sub>3</sub>OS</li> </ul>                      | <ul style="list-style-type: none"> <li>Agonist of the Smoothened (Smo) receptor</li> <li>Smo receptor binding induces the proliferation and survival of neuronal and glial precursors</li> </ul>                                                                                                                                                    | Neuroregulatory                                                                                                      | -                                                                                         | -       | 5284330 | 162 |
| SCH58261 <sup>16</sup>               | <ul style="list-style-type: none"> <li>Triazolopyrimidine</li> <li>C<sub>18</sub>H<sub>15</sub>N<sub>7</sub>O</li> </ul>                     | <ul style="list-style-type: none"> <li>Selective A2A receptor antagonist</li> <li>The A2A receptor regulates inflammation and glutamate and dopamine release in the CNS</li> </ul>                                                                                                                                                                  | <ul style="list-style-type: none"> <li>Anti-inflammatory</li> <li>Neuroregulatory</li> </ul>                         | -                                                                                         | -       | 176408  | 2   |



|                       |                                                                                                                                                                         |                                                                                                                                                                                                                                                                           |                                                                                                                      |                                                                                             |         |           |     |
|-----------------------|-------------------------------------------------------------------------------------------------------------------------------------------------------------------------|---------------------------------------------------------------------------------------------------------------------------------------------------------------------------------------------------------------------------------------------------------------------------|----------------------------------------------------------------------------------------------------------------------|---------------------------------------------------------------------------------------------|---------|-----------|-----|
| Siponimod<br>(BAF312) | <ul style="list-style-type: none"> <li>Orally bioavailable</li> <li>C<sub>29</sub>H<sub>35</sub>F<sub>3</sub>N<sub>2</sub>O<sub>3</sub></li> </ul>                      | <ul style="list-style-type: none"> <li>Selective sphingosine-1-phosphate (S1P) receptor modulator</li> <li>High affinity for S1P receptors 1 and 5</li> </ul>                                                                                                             | Immunosuppressive                                                                                                    | <ul style="list-style-type: none"> <li>CIS</li> <li>RRMS</li> <li>SPMS</li> </ul>           | DB12371 | 44599207  | 71  |
| Tamoxifen             | <ul style="list-style-type: none"> <li>Non-steroidal antiestrogen</li> <li>C<sub>26</sub>H<sub>29</sub>NO</li> </ul>                                                    | <ul style="list-style-type: none"> <li>Inhibits PKC<math>\alpha</math> activity and prevents DNA synthesis</li> <li>Modulates estrogen signaling by competitively inhibiting estrogen binding to receptors</li> </ul>                                                     | Antineoplastic                                                                                                       | Estrogen receptor positive breast cancer                                                    | DB00675 | 2733526   | 58  |
| Timolol               | <ul style="list-style-type: none"> <li>Propranolamine derivative</li> <li>C<sub>13</sub>H<sub>24</sub>N<sub>4</sub>O<sub>3</sub>S</li> </ul>                            | <ul style="list-style-type: none"> <li>Nonselective beta-adrenergic receptor antagonist</li> <li>Reduces intraocular pressure and prevents retinal ganglion cell loss</li> </ul>                                                                                          | Antihypertensive                                                                                                     | <ul style="list-style-type: none"> <li>Glaucoma</li> <li>Hypertension</li> </ul>            | DB00373 | 33624     | 184 |
| U-50488               | <ul style="list-style-type: none"> <li>Monocarboxylic acid amide</li> <li>Synthetic opioid</li> <li>C<sub>19</sub>H<sub>26</sub>Cl<sub>2</sub>N<sub>2</sub>O</li> </ul> | <ul style="list-style-type: none"> <li>Highly selective kappa-opioid receptor (KOR) agonist</li> <li>Does not result in any <math>\mu</math>-opioid antagonist effects</li> <li>Calcium channel blocker</li> <li>Stimulates the release of adrenocorticotropin</li> </ul> | <ul style="list-style-type: none"> <li>Diuretic</li> <li>Analgesic</li> <li>Antitussive</li> </ul>                   | -                                                                                           | -       | 3036289   | 115 |
| VCE-004.8             | <ul style="list-style-type: none"> <li>Semi-synthetic cannabidiol aminoquinone derivative</li> <li>C<sub>28</sub>H<sub>35</sub>NO<sub>3</sub></li> </ul>                | <ul style="list-style-type: none"> <li>Dual PPAR<math>\gamma</math> and CB2 agonist</li> <li>Inhibits prolyl-hydroxylases (PHDs)</li> <li>Activates HIF pathway involved in oligodendrocyte migration</li> </ul>                                                          | Anti-inflammatory                                                                                                    | -                                                                                           | -       | 118465221 | 126 |
| Venlafaxine           | <ul style="list-style-type: none"> <li>Synthetic phenethylamine bicyclic derivative</li> <li>C<sub>17</sub>H<sub>27</sub>NO<sub>2</sub></li> </ul>                      | <ul style="list-style-type: none"> <li>Serotonin-norepinephrine reuptake inhibitor (SNRI)</li> <li>Weak dopamine reuptake inhibitor</li> </ul>                                                                                                                            | <ul style="list-style-type: none"> <li>Antidepressant</li> <li>Neuroprotective</li> <li>Anti-inflammatory</li> </ul> | <ul style="list-style-type: none"> <li>Psychiatric disorders</li> <li>Neuropathy</li> </ul> | DB00285 | 5656      | 218 |
| Xaliproden            | <ul style="list-style-type: none"> <li>Tetrahydropyridine</li> <li>C<sub>24</sub>H<sub>22</sub>F<sub>3</sub>N</li> </ul>                                                | <ul style="list-style-type: none"> <li>Neurotrophin mimetic/ stimulant</li> <li>Non-peptidic serotonin 5-hydroxytryptamine (5-HT) 1A receptor agonist</li> </ul>                                                                                                          | Neuroprotective                                                                                                      | Completed clinical trials for amyotrophic lateral sclerosis and Alzheimer's disease         | DB06393 | 128919    | 184 |
| Yhhu4952              | <ul style="list-style-type: none"> <li>N-Phenylquinazolin-2-amine</li> <li>C<sub>18</sub>H<sub>18</sub>N<sub>4</sub>O</li> </ul>                                        | <ul style="list-style-type: none"> <li>Limited information</li> <li>Low-potency partial CB2 receptor agonist</li> <li>Promotes OPC differentiation by inhibiting the Jagged1-Notch1 pathway</li> </ul>                                                                    | <ul style="list-style-type: none"> <li>Neuroregulatory</li> <li>Immunomodulatory</li> </ul>                          | -                                                                                           | -       | -         | 205 |

**Table S5B. Small molecule enzyme substrates and inhibitors**

| Name                                               | Structure                                                                                                                                                                                  | Mechanism(s) of action                                                                                                                                                                                                                                                                                                                                                                                                            | Biological effect(s)                                                                                                                                    | FDA approved indication(s)                                            | Accession number |             | Article Number |
|----------------------------------------------------|--------------------------------------------------------------------------------------------------------------------------------------------------------------------------------------------|-----------------------------------------------------------------------------------------------------------------------------------------------------------------------------------------------------------------------------------------------------------------------------------------------------------------------------------------------------------------------------------------------------------------------------------|---------------------------------------------------------------------------------------------------------------------------------------------------------|-----------------------------------------------------------------------|------------------|-------------|----------------|
|                                                    |                                                                                                                                                                                            |                                                                                                                                                                                                                                                                                                                                                                                                                                   |                                                                                                                                                         |                                                                       | DrugBank         | PubChem CID |                |
| 4-Aminopyridine (4-AP)                             | <ul style="list-style-type: none"> <li>Isomeric amine of pyridine</li> <li>C<sub>5</sub>H<sub>6</sub>N<sub>2</sub></li> </ul>                                                              | Blocks juxtapanodal potassium channels exposed on demyelinated axons                                                                                                                                                                                                                                                                                                                                                              | <ul style="list-style-type: none"> <li>Neurophysiologic</li> <li>Enhancement of mobility</li> </ul>                                                     | MS-related impairments of motor function                              | DB06637          | 1727        | 21, 52, 112    |
| 18β-glycyrrhetic acid                              | <ul style="list-style-type: none"> <li>Also called Enoxolone</li> <li>Natural pentacyclic triterpenoid aglycone</li> <li>C<sub>30</sub>H<sub>46</sub>O<sub>4</sub></li> </ul>              | <ul style="list-style-type: none"> <li>Metabolite of glycyrrhizin (licorice plant)</li> <li>Inhibits the metabolism of prostaglandins, which inhibits gastric secretion and stimulates intestinal and pancreatic secretion</li> <li>Causes increased intestinal motility</li> <li>"Inhibits 11 beta-hydroxysteroid dehydrogenase and other enzymes involved in the conversion of cortisol to cortisone in the kidneys"</li> </ul> | <ul style="list-style-type: none"> <li>Anti-inflammatory</li> <li>Neuroprotective</li> <li>Gastric and hepatoprotective</li> <li>Antitussive</li> </ul> | Cosmetics and food flavoring (Glycyrrhizic acid)                      | DB13089          | 10114       | 219            |
| 3-n-butyl-phthalide <sup>5</sup> (D and L isomers) | <ul style="list-style-type: none"> <li>Benzofuranone</li> <li>C<sub>12</sub>H<sub>14</sub>O<sub>2</sub></li> </ul>                                                                         | <ul style="list-style-type: none"> <li>Extracted from Chinese celery</li> <li>Blood-brain barrier permeable</li> </ul> Potential mechanisms include: <ul style="list-style-type: none"> <li>Promoting microcirculation</li> <li>Reducing oxidative stress, mitochondrial dysfunction and inflammation by inhibiting NF-κB signaling</li> </ul>                                                                                    | <ul style="list-style-type: none"> <li>Antihypertensive</li> <li>Anti-inflammatory</li> <li>Antioxidant</li> <li>Neuroprotective</li> </ul>             | Completed clinical trials for ischemic stroke and Alzheimer's disease | DB12749          | 61361       | 197            |
| Baicalein                                          | <ul style="list-style-type: none"> <li>Trihydroxyflavone</li> <li>C<sub>15</sub>H<sub>10</sub>O<sub>5</sub></li> </ul>                                                                     | <ul style="list-style-type: none"> <li>Metabolite from <i>Scutellaria baicalensis</i></li> <li>Prostaglandin antagonist</li> <li>Inhibitor of arachidonate 12- and 15-lipoxygenase and prolyl oligopeptidase</li> <li>Free radical scavenger</li> </ul>                                                                                                                                                                           | <ul style="list-style-type: none"> <li>Anti-inflammatory</li> <li>Antioxidant</li> <li>Neuroprotective</li> </ul>                                       | -                                                                     | -                | 5281605     | 67             |
| BLZ945                                             | <ul style="list-style-type: none"> <li>Benzothiazole</li> <li>C<sub>20</sub>H<sub>22</sub>N<sub>4</sub>O<sub>3</sub>S</li> </ul>                                                           | Colony stimulating factor 1 receptor (CSF-1) receptor kinase inhibitor                                                                                                                                                                                                                                                                                                                                                            | Antineoplastic                                                                                                                                          | Recruiting for phase II trial in amyotrophic lateral sclerosis        | -                | 46184986    | 13, 192        |
| BN201                                              | <ul style="list-style-type: none"> <li>Peptoid</li> <li>C<sub>25</sub>H<sub>38</sub>FN<sub>5</sub>O<sub>4</sub></li> </ul>                                                                 | <ul style="list-style-type: none"> <li>Crosses the blood-brain barrier by active transport following neuronal stress responses</li> <li>Promotes OPC and neuronal differentiation</li> <li>Modulates several kinases in the IGF-1 pathway</li> </ul>                                                                                                                                                                              | Neuroprotective                                                                                                                                         | Completed phase I clinical trial for optic neuritis (NCT03630497)     | -                | -           | 184            |
| Bucladesine                                        | <ul style="list-style-type: none"> <li>Cell-permeable analogue of cAMP</li> <li>3',5'-cyclic purine nucleotide</li> <li>C<sub>18</sub>H<sub>24</sub>N<sub>5</sub>O<sub>8</sub>P</li> </ul> | <ul style="list-style-type: none"> <li>Bucladesine is a phosphodiesterase-3 inhibitor, which reduces intracellular cAMP catabolism</li> <li>cAMP is a secondary messenger in signal transduction</li> <li>cAMP can activate protein kinase A (PKA), which "promotes axonal regeneration, regulates inflammatory responses, and inhibits caspase-3 activity"</li> </ul>                                                            | <ul style="list-style-type: none"> <li>Anti-inflammatory</li> <li>Anti-apoptotic</li> <li>Vasodilation</li> </ul>                                       | -                                                                     | DB13242          | 9687        | 182            |

|                                         |                                                                                                                                                                                                                |                                                                                                                                                                                                                                                                                                                                                                                                |                                                                                                                                                       |                                                       |         |           |         |
|-----------------------------------------|----------------------------------------------------------------------------------------------------------------------------------------------------------------------------------------------------------------|------------------------------------------------------------------------------------------------------------------------------------------------------------------------------------------------------------------------------------------------------------------------------------------------------------------------------------------------------------------------------------------------|-------------------------------------------------------------------------------------------------------------------------------------------------------|-------------------------------------------------------|---------|-----------|---------|
| Cordycepin                              | <ul style="list-style-type: none"> <li>• Also called 3'-deoxyadenosine</li> <li>• Purine nucleoside antimetabolite and antibiotic</li> <li>• C<sub>10</sub>H<sub>13</sub>N<sub>5</sub>O<sub>3</sub></li> </ul> | <ul style="list-style-type: none"> <li>• Main bioactive ingredient of <i>Cordyceps militaris</i></li> <li>• Crosses the blood-brain barrier using an adenosine transporter due to structural similarity (mimic)</li> <li>• Induces tumor cell apoptosis and blocks proliferation by Inhibiting polyadenylation, activating AMP-activated protein kinase and reducing mTOR signaling</li> </ul> | <ul style="list-style-type: none"> <li>• Anti-inflammatory</li> <li>• Antioxidant</li> <li>• Anti-proliferative</li> <li>• Neuroprotective</li> </ul> | In multiple clinical trials for leukemia and lymphoma | DB12156 | 6303      | 77      |
| Dapagliflozin                           | <ul style="list-style-type: none"> <li>• C-glycosyl compound</li> <li>• C<sub>21</sub>H<sub>25</sub>ClO<sub>6</sub></li> </ul>                                                                                 | <ul style="list-style-type: none"> <li>• Modulator of lipid and glucose metabolism</li> <li>• Sodium-glucose cotransporter 2 inhibitor</li> </ul>                                                                                                                                                                                                                                              | Antihyperglycemic                                                                                                                                     | Type 2 diabetes mellitus                              | DB06292 | 9887712   | 4       |
| Donepezil                               | <ul style="list-style-type: none"> <li>• Piperidine derivative</li> <li>• C<sub>24</sub>H<sub>29</sub>NO<sub>3</sub></li> </ul>                                                                                | Reversible acetylcholinesterase inhibitor                                                                                                                                                                                                                                                                                                                                                      | Neurocognitive enhancement                                                                                                                            | Alzheimer's disease                                   | DB00843 | 3152      | 37      |
| Ellagic acid                            | <ul style="list-style-type: none"> <li>• Tannic acid derivative</li> <li>• C<sub>14</sub>H<sub>6</sub>O<sub>8</sub></li> </ul>                                                                                 | <ul style="list-style-type: none"> <li>• Exact mechanisms unclear</li> <li>• Inhibitor of numerous enzymes</li> <li>• Inhibits the generation of ROS</li> </ul>                                                                                                                                                                                                                                | <ul style="list-style-type: none"> <li>• Antioxidant</li> <li>• Anti-proliferative</li> </ul>                                                         | -                                                     | DB08846 | 5281855   | 22, 159 |
| Epigallocatechin-3-gallate <sup>6</sup> | <ul style="list-style-type: none"> <li>• Catechin polyphenol</li> <li>• C<sub>22</sub>H<sub>18</sub>O<sub>11</sub></li> </ul>                                                                                  | <ul style="list-style-type: none"> <li>• Most abundant catechin in tea</li> <li>• Binds numerous proteins with high affinity</li> <li>• Exhibits anti-proliferative effects by inhibiting telomerase and DNA methyltransferase</li> <li>• Inhibits MMP-2 and MMP-9 expression</li> <li>• Blocks the activation of epidermal growth factor receptors</li> <li>• ROS scavenging</li> </ul>       | <ul style="list-style-type: none"> <li>• Anti-inflammatory</li> <li>• Antioxidant</li> <li>• Antiproliferative</li> </ul>                             | -                                                     | DB12116 | 65064     | 166     |
| Fluorosamine                            | <ul style="list-style-type: none"> <li>• Fluorinated analogue of UDP-N-acetylglucosamine (GlcNAc)</li> <li>• Structure reported in article</li> </ul>                                                          | <ul style="list-style-type: none"> <li>• Alternative substrate to naturally occurring GlcNAc, a nucleotide sugar and metabolic coenzyme</li> <li>• Interferes with “the enzymatic conversion of naturally occurring UDP-GlcNAc to UDP-N-acetyl-galactosamine by 4-epimerase, which reduces the content of chondroitin sulfate side chains (CSPG precursor)”</li> </ul>                         | Anti-inflammatory                                                                                                                                     | -                                                     | -       | -         | 84      |
| Ginkgolide K                            | <ul style="list-style-type: none"> <li>• Terpene derivative of ginkgolide B</li> <li>• C<sub>20</sub>H<sub>22</sub>O<sub>9</sub></li> </ul>                                                                    | <ul style="list-style-type: none"> <li>• Isolated from <i>Ginkgo biloba</i> leaves</li> <li>• Mechanisms mostly unknown</li> <li>• Promotes astrocyte migration and proliferation</li> <li>• Attenuates mitochondrial dysfunction and free radical production</li> </ul>                                                                                                                       | <ul style="list-style-type: none"> <li>• Neuroprotective</li> <li>• Anti-inflammatory</li> <li>• Antioxidant</li> </ul>                               | -                                                     | -       | 101553595 | 98      |
| Gli-ANTagonist 61 (GANT61)              | <ul style="list-style-type: none"> <li>• Hexahydropyrimidine derivative</li> <li>• C<sub>27</sub>H<sub>35</sub>N<sub>5</sub></li> </ul>                                                                        | <ul style="list-style-type: none"> <li>• Inhibitor of Gli1 and glioma-associated oncogene</li> <li>• Blood-brain barrier permeable</li> </ul>                                                                                                                                                                                                                                                  | Antineoplastic                                                                                                                                        | -                                                     | -       | 421610    | 158     |
| Hesperetin                              | <ul style="list-style-type: none"> <li>• Flavonoid</li> <li>• C<sub>16</sub>H<sub>14</sub>O<sub>6</sub></li> </ul>                                                                                             | <ul style="list-style-type: none"> <li>• Lowers cholesterol by inhibiting the activity of acyl-coenzyme A</li> <li>• Upregulates the LDL receptor</li> <li>• Free radical scavenger</li> </ul>                                                                                                                                                                                                 | <ul style="list-style-type: none"> <li>• Antioxidant</li> <li>• Anti-inflammatory</li> <li>• Hypolipidemic</li> <li>• Antineoplastic</li> </ul>       | -                                                     | DB01094 | 72281     | 10      |
| Icariin                                 | <ul style="list-style-type: none"> <li>• Glycosyloxyflavone</li> <li>• C<sub>33</sub>H<sub>40</sub>O<sub>15</sub></li> </ul>                                                                                   | <ul style="list-style-type: none"> <li>• Inhibitor of phosphodiesterase-5 and NF-κB signalling</li> <li>• Dominant active component extracted from the traditional Chinese herb <i>Epimedium</i></li> </ul>                                                                                                                                                                                    | <ul style="list-style-type: none"> <li>• Antioxidant</li> <li>• Anti-inflammatory</li> <li>• Anti-thrombotic</li> </ul>                               | -                                                     | DB12052 | 5318997   | 215     |

|                           |                                                                                                                                                                      |                                                                                                                                                                                                                                                                                                                                             |                                                                                                                                     |                                                                                                                    |         |          |            |  |
|---------------------------|----------------------------------------------------------------------------------------------------------------------------------------------------------------------|---------------------------------------------------------------------------------------------------------------------------------------------------------------------------------------------------------------------------------------------------------------------------------------------------------------------------------------------|-------------------------------------------------------------------------------------------------------------------------------------|--------------------------------------------------------------------------------------------------------------------|---------|----------|------------|--|
|                           |                                                                                                                                                                      | <ul style="list-style-type: none"> <li>Proposed to induce multiple different effects</li> </ul>                                                                                                                                                                                                                                             | <ul style="list-style-type: none"> <li>Lipid modulation</li> </ul>                                                                  |                                                                                                                    |         |          |            |  |
| JZL184                    | <ul style="list-style-type: none"> <li>Benzodioxole</li> <li>C<sub>27</sub>H<sub>24</sub>N<sub>2</sub>O<sub>9</sub></li> </ul>                                       | <ul style="list-style-type: none"> <li>Selective and irreversible inhibitor of monoacylglycerol lipase, the main enzyme responsible for degrading 2-arachidonoylglycerol</li> <li>Increases endogenous cannabinoid levels</li> </ul>                                                                                                        | <ul style="list-style-type: none"> <li>Cannabinoid-related behavioural effects in mice</li> </ul>                                   | -                                                                                                                  | -       | 25021165 | 17         |  |
| KT182                     | <ul style="list-style-type: none"> <li>Triazole urea derivative</li> <li>C<sub>27</sub>H<sub>26</sub>N<sub>4</sub>O<sub>2</sub></li> </ul>                           | <ul style="list-style-type: none"> <li>Specific inhibitor of the 2-arachidonoylglycerol hydrolytic enzyme, monoacylglycerol lipase ABHD6</li> <li>Blood-brain barrier permeable</li> <li>Modulates endocannabinoid signaling</li> </ul>                                                                                                     | <ul style="list-style-type: none"> <li>Neuroregulatory</li> </ul>                                                                   | -                                                                                                                  | -       | 53364491 | 108        |  |
| L-a-aminoadipate (L-AAA)  | <ul style="list-style-type: none"> <li>Glutamate homologue</li> <li>Derived from adipic acid</li> <li>C<sub>6</sub>H<sub>11</sub>NO<sub>4</sub></li> </ul>           | <ul style="list-style-type: none"> <li>Transient astrotxin</li> <li>Induces ablation of astrocytes through inhibition of glutamate biosynthesis and uptake</li> <li>Inhibits signalling between astrocytes and microglia</li> </ul>                                                                                                         | <ul style="list-style-type: none"> <li>Gliotoxic</li> </ul>                                                                         | -                                                                                                                  | -       | 469      | 104        |  |
| Leonurine                 | <ul style="list-style-type: none"> <li>Bioactive alkaloid</li> <li>Trihydroxybenzoic acid</li> <li>C<sub>14</sub>H<sub>21</sub>N<sub>3</sub>O<sub>5</sub></li> </ul> | <ul style="list-style-type: none"> <li>Extracted from <i>Herba leonuri</i></li> <li>Inhibits cyclooxygenase-2 expression via NF-κB signalling pathways</li> <li>Reduces microglial and macrophage activation</li> </ul>                                                                                                                     | <ul style="list-style-type: none"> <li>Anti-inflammatory</li> <li>Neuroprotective</li> </ul>                                        | -                                                                                                                  | -       | 161464   | 79         |  |
| Linagliptin               | <ul style="list-style-type: none"> <li>Dihydropurinedione-based xanthine</li> <li>C<sub>25</sub>H<sub>28</sub>N<sub>8</sub>O<sub>2</sub></li> </ul>                  | <ul style="list-style-type: none"> <li>Competitive and reversible inhibitor of dipeptidyl peptidase 4</li> <li>Stimulates the release of insulin from beta cells in the pancreas while inhibiting the release of glucagon</li> <li>Reduces glycogen catabolism in the liver and increases insulin release in response to glucose</li> </ul> | <ul style="list-style-type: none"> <li>Antihyperglycemic</li> </ul>                                                                 | Type 2 diabetes mellitus                                                                                           | DB08882 | 10096344 | 46         |  |
| Metformin                 | <ul style="list-style-type: none"> <li>Dimethylguanylguanidine</li> <li>C<sub>4</sub>H<sub>11</sub>N<sub>5</sub></li> </ul>                                          | <ul style="list-style-type: none"> <li>Modulates energy metabolism and glucose levels</li> <li>Inhibits mitochondrial complex I activity</li> <li>Activates AMP-activated protein kinase</li> </ul>                                                                                                                                         | <ul style="list-style-type: none"> <li>Antihyperglycemic</li> <li>Antioxidant</li> <li>Anti-inflammatory</li> </ul>                 | Type 2 diabetes mellitus                                                                                           | DB00331 | 4091     | 4, 96, 128 |  |
| Miconazole                | <ul style="list-style-type: none"> <li>Azole sterane</li> <li>C<sub>18</sub>H<sub>14</sub>Cl<sub>4</sub>N<sub>2</sub>O</li> </ul>                                    | <ul style="list-style-type: none"> <li>ERK1/2 activator and glucocorticoid receptor antagonist</li> <li>Inhibits fungal enzymes, causing elevated levels of ROS</li> <li>Increases intracellular levels of farnesol in yeast</li> </ul>                                                                                                     | <ul style="list-style-type: none"> <li>Antifungal</li> </ul>                                                                        | Mucosal yeast infections                                                                                           | DB01110 | 4189     | 125, 201   |  |
| Mitoxantrone <sup>7</sup> | <ul style="list-style-type: none"> <li>Anthracenedione antibiotic</li> <li>C<sub>22</sub>H<sub>28</sub>N<sub>4</sub>O<sub>6</sub></li> </ul>                         | <ul style="list-style-type: none"> <li>Intercalates DNA and RNA</li> <li>Potent inhibitor of topoisomerase II</li> <li>Inhibits B cell, T cell, and macrophage proliferation and impairs antigen presentation</li> <li>Reduces the secretion of pro-inflammatory cytokines</li> </ul>                                                       | <ul style="list-style-type: none"> <li>Antineoplastic</li> <li>Anti-inflammatory</li> </ul>                                         | <ul style="list-style-type: none"> <li>Acute Lymphocytic Leukemia</li> <li>Worsening RRMS</li> <li>SPMS</li> </ul> | DB01204 | 4212     | 55         |  |
| Myricetin                 | <ul style="list-style-type: none"> <li>Hexahydroxyflavone</li> <li>Structurally similar to quercetin</li> <li>C<sub>15</sub>H<sub>10</sub>O<sub>8</sub></li> </ul>   | <ul style="list-style-type: none"> <li>Metabolic precursor</li> <li>Upregulates the Nrf2 signaling pathway</li> <li>Inhibitor of cyclooxygenase 1</li> </ul>                                                                                                                                                                                | <ul style="list-style-type: none"> <li>Antioxidant</li> <li>Anti-inflammatory</li> <li>Antiviral</li> <li>Antineoplastic</li> </ul> | -                                                                                                                  | DB02375 | 5281672  | 212        |  |
| Nimodipine                | <ul style="list-style-type: none"> <li>Dihydropyridine</li> <li>C<sub>21</sub>H<sub>26</sub>N<sub>2</sub>O<sub>7</sub></li> </ul>                                    | <ul style="list-style-type: none"> <li>Selectively binds and blocks L-type voltage-gated calcium channels on vascular smooth muscle cells</li> <li>Blood-brain barrier permeable</li> </ul>                                                                                                                                                 | <ul style="list-style-type: none"> <li>Neuroprotective</li> <li>Antihypertensive</li> </ul>                                         | Cerebral vasospasms                                                                                                | DB00393 | 4497     | 73, 164    |  |

|                                |                                                                                                                                                                       |                                                                                                                                                                                                                                                                                                                         |                                                                                                                                                             |                                                                                               |         |           |        |
|--------------------------------|-----------------------------------------------------------------------------------------------------------------------------------------------------------------------|-------------------------------------------------------------------------------------------------------------------------------------------------------------------------------------------------------------------------------------------------------------------------------------------------------------------------|-------------------------------------------------------------------------------------------------------------------------------------------------------------|-----------------------------------------------------------------------------------------------|---------|-----------|--------|
| Novel/ proprietary compound 22 | <ul style="list-style-type: none"> <li>Hydantoin core structure with an imidazole moiety</li> <li>Structure reported in article</li> </ul>                            | <ul style="list-style-type: none"> <li>Inhibitor of protein arginine deiminase (PAD) 2 and 4</li> <li>PAD2 and PAD4 expression is upregulated during early lesion formation in the CNS</li> <li>PAD enzymes can hyper-citrullinate structural proteins such as MBP</li> </ul>                                           | Anti-inflammatory                                                                                                                                           | -                                                                                             | -       | -         | 163    |
| Omeprazole                     | <ul style="list-style-type: none"> <li>Benzimidazole</li> <li>C<sub>17</sub>H<sub>19</sub>N<sub>3</sub>O<sub>3</sub>S</li> </ul>                                      | <ul style="list-style-type: none"> <li>Selective and irreversible proton-pump inhibitor</li> <li>Reduces gastric acid secretion</li> </ul>                                                                                                                                                                              | <ul style="list-style-type: none"> <li>Antisecretory</li> <li>Anti-inflammatory</li> </ul>                                                                  | Gastric ulcers                                                                                | DB00338 | 4594      | 221    |
| PD0325901                      | <ul style="list-style-type: none"> <li>Synthetic aminobenzoic acid derivative</li> <li>C<sub>16</sub>H<sub>14</sub>F<sub>3</sub>N<sub>2</sub>O<sub>4</sub></li> </ul> | <ul style="list-style-type: none"> <li>MAPK kinase inhibitor and the phosphorylation and activation of MAPK/ERK</li> <li>Reduces tumor cell proliferation</li> </ul>                                                                                                                                                    | Antineoplastic                                                                                                                                              | In multiple trials for various cancers                                                        | DB07101 | 9826528   | 174    |
| Phenytoin                      | <ul style="list-style-type: none"> <li>Hydantoin derivative</li> <li>C<sub>15</sub>H<sub>12</sub>N<sub>2</sub>O<sub>2</sub></li> </ul>                                | <ul style="list-style-type: none"> <li>Selective sodium-channel inhibitor</li> <li>Non-sedative antiepileptic agent with a narrow therapeutic index</li> <li>"Prevents seizures by inhibiting the positive feedback loop that results in neuronal propagation of high frequency action potentials"</li> </ul>           | <ul style="list-style-type: none"> <li>Anticonvulsant</li> <li>Neuroprotective</li> </ul>                                                                   | Epilepsy                                                                                      | DB00252 | 1775      | 149    |
| PLX3397                        | <ul style="list-style-type: none"> <li>Also called Pexidartinib</li> <li>Pyrrolopyridine</li> <li>C<sub>20</sub>H<sub>15</sub>ClF<sub>3</sub>N<sub>5</sub></li> </ul> | <ul style="list-style-type: none"> <li>Inhibitor of colony-stimulating factor 1 receptor (CSF1R) signalling via selective tyrosine kinases</li> <li>Microglia and inflammatory macrophage depletion</li> </ul>                                                                                                          | <ul style="list-style-type: none"> <li>Anti-inflammatory</li> <li>Antineoplastic</li> </ul>                                                                 | Tenosynovial giant cell tumor                                                                 | DB12978 | 25151352  | 176    |
| Pregabalin                     | <ul style="list-style-type: none"> <li>Structural derivative of GABA</li> <li>C<sub>8</sub>H<sub>17</sub>NO<sub>2</sub></li> </ul>                                    | <ul style="list-style-type: none"> <li>Not entirely defined</li> <li>Binds α<sub>2σ</sub> subunit of synaptic voltage gated calcium channels</li> <li>Inhibits the release of numerous neurotransmitters, including glutamate, dopamine and serotonin</li> </ul>                                                        | <ul style="list-style-type: none"> <li>Analgesic/Antinociceptive</li> <li>Anticonvulsant</li> </ul>                                                         | <ul style="list-style-type: none"> <li>Neuropathic pain</li> <li>Epilepsy disorder</li> </ul> | DB00230 | 5486971   | 38, 70 |
| Proanthocyanidin <sup>8</sup>  | <ul style="list-style-type: none"> <li>Flavonoid</li> <li>Oligomeric polymer</li> <li>C<sub>31</sub>H<sub>28</sub>O<sub>12</sub></li> </ul>                           | <ul style="list-style-type: none"> <li>Component of grape seed extract (condensed tannins)</li> <li>Reduces ROS levels</li> <li>Protects from arteriosclerosis by inhibiting oxidized LDL binding to the lectin-like oxidized LDL receptor (LOX-1)</li> <li>Can modulate NF-κB signalling in the hippocampus</li> </ul> | <ul style="list-style-type: none"> <li>Antioxidant</li> <li>Anticancer</li> <li>Cardioprotective</li> <li>Neuroprotective</li> <li>Antimicrobial</li> </ul> | -                                                                                             | -       | 108065    | 188    |
| Quercetin                      | <ul style="list-style-type: none"> <li>Polyphenolic flavonoid</li> <li>C<sub>15</sub>H<sub>10</sub>O<sub>7</sub></li> </ul>                                           | <ul style="list-style-type: none"> <li>Dietary component of fruit and herbs</li> <li>Specific quinone reductase 2 (QR2) inhibitor</li> </ul>                                                                                                                                                                            | <ul style="list-style-type: none"> <li>Antioxidant</li> <li>Anti-inflammatory</li> </ul>                                                                    | -                                                                                             | DB04216 | 5280343   | 4      |
| Resveratrol                    | <ul style="list-style-type: none"> <li>Polyphenolic phytoalexin</li> <li>C<sub>14</sub>H<sub>12</sub>O<sub>3</sub></li> </ul>                                         | <ul style="list-style-type: none"> <li>Blood-brain barrier permeable</li> <li>Inhibits cyclooxygenase and hydroperoxidase</li> <li>Suppresses TNF-induced activation of NFκB in HSV infected cells</li> </ul>                                                                                                           | <ul style="list-style-type: none"> <li>Antioxidant</li> <li>Anti-inflammatory</li> <li>Cardioprotective</li> <li>Antiherpetic</li> </ul>                    | In multiple clinical trials for viral, inflammatory and cardiac conditions                    | DB02709 | 445154    | 53     |
| Rifampicin                     | <ul style="list-style-type: none"> <li>Semi-synthetic antibiotic</li> <li>C<sub>43</sub>H<sub>58</sub>N<sub>4</sub>O<sub>12</sub></li> </ul>                          | <ul style="list-style-type: none"> <li>Derived from <i>Streptomyces mediterranei</i></li> <li>Blocks transcription by inhibiting DNA-dependent RNA polymerase activity</li> <li>Pregnane X receptor agonist</li> </ul>                                                                                                  | <ul style="list-style-type: none"> <li>Antibacterial</li> <li>Neuroprotective</li> <li>Anti-inflammatory</li> </ul>                                         | Mycobacterial infection and related disease                                                   | DB01045 | 135398735 | 207    |
| SB203580                       | <ul style="list-style-type: none"> <li>Imidazole derivative</li> <li>C<sub>21</sub>H<sub>16</sub>FN<sub>3</sub>OS</li> </ul>                                          | Inhibitor of p38, Hsp90, mitogen-activated protein kinase and non-specific serine/threonine protein kinase                                                                                                                                                                                                              | Neuroprotective                                                                                                                                             | -                                                                                             | -       | 176155    | 187    |

|                         |                                                                                                                                                                        |                                                                                                                                                                                                                                                                                                                                                   |                                                                                                              |                                                                                                                  |         |           |     |
|-------------------------|------------------------------------------------------------------------------------------------------------------------------------------------------------------------|---------------------------------------------------------------------------------------------------------------------------------------------------------------------------------------------------------------------------------------------------------------------------------------------------------------------------------------------------|--------------------------------------------------------------------------------------------------------------|------------------------------------------------------------------------------------------------------------------|---------|-----------|-----|
| Scutellarin             | <ul style="list-style-type: none"> <li>Glycosyloxyflavone</li> <li>C<sub>21</sub>H<sub>18</sub>O<sub>12</sub></li> </ul>                                               | <ul style="list-style-type: none"> <li>Protects astrocytes from hypoxia by inducing the production of neurotrophins</li> <li>Proteasome inhibitor</li> </ul>                                                                                                                                                                                      | <ul style="list-style-type: none"> <li>Neuroprotective</li> <li>Antineoplastic</li> </ul>                    | Present in some OTC products and stroke drug Breviscapine                                                        | DB14364 | 185617    | 187 |
| Sephin1                 | <ul style="list-style-type: none"> <li>Guanabenz derivative</li> <li>C<sub>8</sub>H<sub>9</sub>ClN<sub>4</sub></li> </ul>                                              | <ul style="list-style-type: none"> <li>Selective inhibitor eIF2<math>\alpha</math> phosphatase, "thereby prolonging the protective integrated stress response"</li> <li>Unlike guanabenz, Sephin1 retains inhibitor specificity without measurable <math>\alpha</math>2-adrenergic side effects</li> </ul>                                        | Neuroprotective                                                                                              | -                                                                                                                | -       | 9561611   | 30  |
| Sildenafil              | <ul style="list-style-type: none"> <li>Structure similar to cGMP</li> <li>C<sub>22</sub>H<sub>30</sub>N<sub>6</sub>O<sub>4</sub>S</li> </ul>                           | <ul style="list-style-type: none"> <li>Reduces the catabolism of cGMP by inhibiting cGMP specific phosphodiesterase type 5</li> <li>Reduces arterial hypertension by increasing blood flow</li> </ul>                                                                                                                                             | <ul style="list-style-type: none"> <li>Neuroprotective</li> <li>Antihypertensive</li> </ul>                  | <ul style="list-style-type: none"> <li>Erectile dysfunction</li> <li>Pulmonary hypertension</li> </ul>           | DB00203 | 135398744 | 39  |
| Sodium valproate        | <ul style="list-style-type: none"> <li>Fatty acid derivative</li> <li>Sodium 2-propylpentanoate</li> <li>C<sub>8</sub>H<sub>15</sub>NaO<sub>2</sub></li> </ul>         | <ul style="list-style-type: none"> <li>Increases synaptic GABA levels</li> <li>Inhibits succinic semialdehyde dehydrogenase, that in turn inhibits GABA transaminase, which catabolizes GABA and/ or blocks synaptic reuptake</li> </ul>                                                                                                          | Anticonvulsant                                                                                               | <ul style="list-style-type: none"> <li>Epilepsy</li> <li>Migraines</li> </ul>                                    | DB00313 | 16760703  | 55  |
| STRTAW04                | Chemical structure not available                                                                                                                                       | <ul style="list-style-type: none"> <li>Increases SIRT1 deacetylase activity</li> <li>Activator of SIRT1 without nonspecific activation of pathways affected by resveratrol</li> <li>Effects measurable at an order of magnitude lower concentration than resveratrol</li> </ul>                                                                   | <ul style="list-style-type: none"> <li>Neuroprotective</li> <li>Antioxidant</li> </ul>                       | -                                                                                                                | -       | -         | 85  |
| Sulfasalazine           | <ul style="list-style-type: none"> <li>Synthetic salicylic acid derivative</li> <li>C<sub>18</sub>H<sub>14</sub>N<sub>4</sub>O<sub>5</sub>S</li> </ul>                 | <ul style="list-style-type: none"> <li>Unclear</li> <li>Appears to inhibit cyclooxygenase and prostaglandin production</li> <li>Therapeutic effects considered to be due to the 5-ASA moiety</li> </ul>                                                                                                                                           | Anti-inflammatory                                                                                            | <ul style="list-style-type: none"> <li>Rheumatological conditions</li> <li>Inflammatory bowel disease</li> </ul> | DB00795 | 5339      | 41  |
| Teriflunomide           | <ul style="list-style-type: none"> <li>Active metabolite of leflunomide</li> <li>C<sub>12</sub>H<sub>9</sub>F<sub>3</sub>N<sub>2</sub>O<sub>2</sub></li> </ul>         | <ul style="list-style-type: none"> <li>Multiple proposed mechanisms</li> <li>Targets active adaptive immune cells (T and B)</li> <li>Non-competitive reversible inhibitor of the mitochondrial enzyme dihydro-orotate dehydrogenase</li> <li>Proposed to interfere with antigen presentation to T cells and inhibit cytokine secretion</li> </ul> | <ul style="list-style-type: none"> <li>Immunosuppressive</li> <li>Antiproliferative</li> </ul>               | RRMS                                                                                                             | DB08880 | 54684141  | 142 |
| Triptolide              | <ul style="list-style-type: none"> <li>Diterpenoid triepoxide</li> <li>C<sub>20</sub>H<sub>24</sub>O<sub>6</sub></li> </ul>                                            | <ul style="list-style-type: none"> <li>Plant metabolite</li> <li>Inhibitor of pro-inflammatory NF-<math>\kappa</math>B signaling in macrophages</li> </ul>                                                                                                                                                                                        | <ul style="list-style-type: none"> <li>Anti-inflammatory</li> <li>Antioxidant</li> <li>Anticancer</li> </ul> | Evaluated in clinical trials for intestinal inflammation and HIV infection                                       | DB12025 | 107985    | 160 |
| UCM-03025 (compound 21) | Structure reported in article                                                                                                                                          | <ul style="list-style-type: none"> <li>Potent, selective and reversible inhibitor of monoacylglycerol lipase</li> <li>Reduces 2-AG degradation</li> </ul>                                                                                                                                                                                         | Neuroregulatory                                                                                              | -                                                                                                                | -       | -         | 48  |
| VP1.15                  | <ul style="list-style-type: none"> <li>2-[(2,3-Diphenyl-1,2,4-thiadiazol-5(2H)-ylidene) amino] ethanol</li> <li>C<sub>16</sub>H<sub>15</sub>N<sub>3</sub>OS</li> </ul> | <ul style="list-style-type: none"> <li>Dual phosphodiesterase (PDE)7 and glycogen synthase kinase (GSK)3 inhibitor</li> <li>CNS-penetrant</li> </ul>                                                                                                                                                                                              | <ul style="list-style-type: none"> <li>Anti-inflammatory</li> <li>Neuroprotective</li> </ul>                 | -                                                                                                                | -       | 46902082  | 114 |

|                       |                                                                                                                                                                                                                    |                                                                                                                                                                                                                |                                                                                                  |   |         |          |     |
|-----------------------|--------------------------------------------------------------------------------------------------------------------------------------------------------------------------------------------------------------------|----------------------------------------------------------------------------------------------------------------------------------------------------------------------------------------------------------------|--------------------------------------------------------------------------------------------------|---|---------|----------|-----|
| VP3.15                | <ul style="list-style-type: none"> <li>• VP1.15 derivative</li> <li>• N-(2-Morpholin-4-ylethyl)-2,3-diphenyl-1,2,4-thiadiazol-5-imine</li> <li>• C<sub>20</sub>H<sub>22</sub>N<sub>4</sub>O<sub>5</sub></li> </ul> | <ul style="list-style-type: none"> <li>• Dual phosphodiesterase (PDE)7 and glycogen synthase kinase (GSK)3 inhibitor</li> <li>• Improved safety profile compared to VP1.15</li> <li>• CNS-penetrant</li> </ul> | <ul style="list-style-type: none"> <li>• Anti-inflammatory</li> <li>• Neuroprotective</li> </ul> | - | -       | 51038980 | 114 |
| Xyloside <sup>9</sup> | <ul style="list-style-type: none"> <li>• Glycoside derived from xylose</li> <li>• C<sub>5</sub>H<sub>10</sub>O<sub>5</sub></li> </ul>                                                                              | <ul style="list-style-type: none"> <li>• Inhibitor of CSPG synthesis by competing with endogenous primers for binding of the core of galactosyltransferase in chondrocytes</li> </ul>                          | Metabolic/ biosynthetic                                                                          | - | DB09419 | 135191   | 48  |

**Table S5C. Small molecule hormones, metabolites and vitamins**

| Name                                             | Structure                                                                                                                                                                               | Mechanism(s) of action                                                                                                                                                                                                                                                                                                    | Biological effect(s)                                                                                                     | FDA approved indication(s)                                                                                         | Accession number |             | Article Number |
|--------------------------------------------------|-----------------------------------------------------------------------------------------------------------------------------------------------------------------------------------------|---------------------------------------------------------------------------------------------------------------------------------------------------------------------------------------------------------------------------------------------------------------------------------------------------------------------------|--------------------------------------------------------------------------------------------------------------------------|--------------------------------------------------------------------------------------------------------------------|------------------|-------------|----------------|
|                                                  |                                                                                                                                                                                         |                                                                                                                                                                                                                                                                                                                           |                                                                                                                          |                                                                                                                    | DrugBank         | PubChem CID |                |
| Acetate                                          | <ul style="list-style-type: none"> <li>• 2 carbon short-chain fatty acid</li> <li>• C<sub>2</sub>H<sub>3</sub>O<sub>2</sub><sup>-</sup></li> </ul>                                      | <ul style="list-style-type: none"> <li>• Metabolic precursor</li> <li>• Modulation of intestinal homeostasis, energy metabolism and immune responses</li> </ul>                                                                                                                                                           | <ul style="list-style-type: none"> <li>• Metabolic</li> <li>• Immunomodulatory</li> </ul>                                | <ul style="list-style-type: none"> <li>• Food additive</li> <li>• Metabolic acidosis</li> </ul>                    | DB14511, DB09395 | 175         | 31             |
| Alpha Lipoic Acid (Thioctic acid)                | <ul style="list-style-type: none"> <li>• Vitamin-like dithiol</li> <li>• Micronutrient</li> <li>• C<sub>8</sub>H<sub>14</sub>O<sub>2</sub>S<sub>2</sub></li> </ul>                      | <ul style="list-style-type: none"> <li>• ROS scavenging and metal chelation</li> <li>• Enzyme cofactor in energy production and glucose metabolism</li> <li>• Regenerates endogenous antioxidants, vitamins C and E and glutathione</li> </ul>                                                                            | <ul style="list-style-type: none"> <li>• Antioxidant</li> <li>• Anti-inflammatory</li> <li>• Antihypertensive</li> </ul> | Nutritional supplementation                                                                                        | DB00166          | 864         | 161            |
| Butyrate                                         | <ul style="list-style-type: none"> <li>• 4 carbon short-chain fatty acid</li> <li>• C<sub>4</sub>H<sub>7</sub>O<sub>2</sub><sup>-</sup></li> </ul>                                      | <ul style="list-style-type: none"> <li>• Metabolic precursor</li> <li>• Produced by commensal intestinal bacteria</li> <li>• Modulation of intestinal homeostasis, energy metabolism, and immune responses</li> </ul>                                                                                                     | <ul style="list-style-type: none"> <li>• Metabolic</li> <li>• Immunomodulatory</li> </ul>                                | -                                                                                                                  | DB03568          | 104775      | 31             |
| Creatine monohydrate                             | <ul style="list-style-type: none"> <li>• Amino acid derivative</li> <li>• C<sub>4</sub>H<sub>9</sub>N<sub>3</sub>O<sub>2</sub></li> </ul>                                               | <ul style="list-style-type: none"> <li>• Intracellular ATP buffering and energy storage</li> <li>• Reversibly dephosphorylated for rapid ATP regeneration at sites with high energy usage</li> <li>• Oligodendrocytes express creatine-synthesizing enzymes</li> </ul>                                                    | <ul style="list-style-type: none"> <li>• Cytoprotective</li> <li>• Antioxidant</li> </ul>                                | <ul style="list-style-type: none"> <li>• Nutritional supplementation</li> <li>• Mitochondrial disorders</li> </ul> | DB00148          | 80116       | 26             |
| Cyclic phosphatidic acid <sup>10</sup>           | <ul style="list-style-type: none"> <li>• 1-acyl-2,3-glycerophosphate</li> <li>• Unique cyclic phosphate ring structure</li> <li>• C<sub>21</sub>H<sub>39</sub>O<sub>6</sub>P</li> </ul> | <ul style="list-style-type: none"> <li>• Phospholipid mediator</li> <li>• Analog of lysophosphatidic acid (LPA) that binds LPA receptors 1 – 5</li> <li>• Exhibits neurotrophin-like activity</li> <li>• Inhibits DNA polymerase α</li> </ul>                                                                             | <ul style="list-style-type: none"> <li>• Antimitogenic</li> <li>• Cellular regulation</li> </ul>                         | -                                                                                                                  | -                | 52922109    | 199            |
| Cytidine-5'-diphospho (CDP)-choline (Citicoline) | <ul style="list-style-type: none"> <li>• Naturally occurring endogenous nucleoside</li> <li>• C<sub>14</sub>H<sub>26</sub>N<sub>4</sub>O<sub>11</sub>P<sub>2</sub></li> </ul>           | <ul style="list-style-type: none"> <li>• Metabolic intermediate in the biosynthesis of the cell membrane component phosphatidylcholine (lecithin)</li> <li>• "Degradation products cytidine and choline readily cross the blood–brain barrier and enter the various biosynthetic pathways that use CDP-cholin"</li> </ul> | <ul style="list-style-type: none"> <li>• Neuroregulatory</li> <li>• Metabolic</li> <li>• Anti-apoptotic</li> </ul>       | Approved in Europe for neurological conditions                                                                     | DB12153          | 13804       | 169            |

|                                       |                                                                                                                                                                                                  |                                                                                                                                                                                                                                                                                                                                                                                             |                                                                                                                                           |                                              |         |          |         |
|---------------------------------------|--------------------------------------------------------------------------------------------------------------------------------------------------------------------------------------------------|---------------------------------------------------------------------------------------------------------------------------------------------------------------------------------------------------------------------------------------------------------------------------------------------------------------------------------------------------------------------------------------------|-------------------------------------------------------------------------------------------------------------------------------------------|----------------------------------------------|---------|----------|---------|
|                                       |                                                                                                                                                                                                  | <ul style="list-style-type: none"> <li>Promotes acetylcholine, norepinephrine and dopamine production in the CNS</li> </ul>                                                                                                                                                                                                                                                                 |                                                                                                                                           |                                              |         |          |         |
| Ethyl pyruvate (CTI-01) <sup>11</sup> | <ul style="list-style-type: none"> <li>Belongs to the family of alpha-keto acids</li> <li>Ethyl 2-oxopropanoate</li> <li>C<sub>5</sub>H<sub>8</sub>O<sub>3</sub></li> </ul>                      | <ul style="list-style-type: none"> <li>Simple derivative of pyruvate</li> <li>Inhibits the systemic release of cytokines TNF-alpha and HMGB1</li> <li>ROS scavenging</li> </ul>                                                                                                                                                                                                             | <ul style="list-style-type: none"> <li>Anti-inflammatory</li> <li>Antioxidant</li> </ul>                                                  | Critical inflammatory conditions             | DB05869 | 12041    | 68      |
| L-ascorbyl-2-phosphate (As-2P)        | <ul style="list-style-type: none"> <li>A synthetic, stable form of Vitamin C</li> <li>C<sub>6</sub>H<sub>11</sub>O<sub>10</sub>P</li> </ul>                                                      | <ul style="list-style-type: none"> <li>Enzyme cofactor and ROS scavenging</li> <li>Necessary for the development and maintenance of connective tissues and bones</li> <li>Role in wound healing and Schwann cell-mediated myelination of dorsal root ganglion neurons</li> </ul>                                                                                                            | <ul style="list-style-type: none"> <li>Antioxidant</li> </ul>                                                                             | Cosmetic and dermatological product additive | DB11352 | 54679073 | 62      |
| Levothyroxine                         | <ul style="list-style-type: none"> <li>Synthetic levoisomer of thyroxine (T4) hormone</li> <li>C<sub>15</sub>H<sub>11</sub>I<sub>4</sub>NO<sub>4</sub></li> </ul>                                | <ul style="list-style-type: none"> <li>De-iodinated to form triiodothyronine (T3)</li> <li>T3 binds nuclear thyroid hormone receptors and the hormone-receptor complex</li> <li>T3 regulates expression of genes involved in cellular growth and differentiation and the metabolism of proteins, carbohydrates and lipids</li> <li>Cardiac stimulatory effect</li> </ul>                    | <ul style="list-style-type: none"> <li>Endocrine</li> <li>Regulatory</li> </ul>                                                           | Hypothyroidism (deficiency syndromes)        | DB00451 | 5819     | 140     |
| Melatonin                             | <ul style="list-style-type: none"> <li>Hormone/ biogenic amine</li> <li>C<sub>13</sub>H<sub>16</sub>N<sub>2</sub>O<sub>2</sub></li> </ul>                                                        | <ul style="list-style-type: none"> <li>Blood-brain barrier permeable pineal hormone that regulates circadian and seasonal rhythms</li> <li>Free radical scavenging and regulation of apoptotic pathways</li> <li>“Implicated in the regulation of mood, learning and memory, immune activity, dreaming, fertility and reproduction”</li> <li>Inhibition of microglial activation</li> </ul> | <ul style="list-style-type: none"> <li>Endocrine</li> <li>Antioxidant</li> <li>Anti-apoptotic</li> </ul>                                  | Circadian rhythm disorders                   | DB01065 | 896      | 81, 183 |
| Methylthioadenosine                   | <ul style="list-style-type: none"> <li>Polyamine pathway nucleoside metabolite</li> <li>5'-S-methyl-5'-thioadenosine</li> <li>C<sub>11</sub>H<sub>15</sub>N<sub>5</sub>O<sub>3</sub>S</li> </ul> | <ul style="list-style-type: none"> <li>Modulates DNA and protein methylation</li> <li>Involved in the regulation of gene expression, cell signaling, proliferation, differentiation and apoptosis</li> <li>Needed for the regeneration of adenosine and methionine</li> </ul>                                                                                                               | <ul style="list-style-type: none"> <li>Hepatoprotective</li> <li>Immunomodulator</li> <li>Neuroprotective</li> <li>Antioxidant</li> </ul> | -                                            | DB02282 | 439176   | 93, 120 |
| Nestorone (Segesterone acetate)       | <ul style="list-style-type: none"> <li>Synthetic 19-nor-progesterone derivative and steroidal progestin</li> <li>C<sub>23</sub>H<sub>30</sub>O<sub>4</sub></li> </ul>                            | <ul style="list-style-type: none"> <li>Highly potent and selective progesterone receptor agonist</li> <li>100 times more active than progesterone in the reproductive system</li> <li>Does not bind androgen receptors</li> </ul>                                                                                                                                                           | <ul style="list-style-type: none"> <li>Reproduction</li> <li>Anti-ovulatory</li> </ul>                                                    | Contraceptives                               | DB14583 | 108059   | 45      |
| Progesterone                          | <ul style="list-style-type: none"> <li>C21-steroid hormone</li> <li>C<sub>21</sub>H<sub>30</sub>O<sub>2</sub></li> </ul>                                                                         | <ul style="list-style-type: none"> <li>Binds intracellular and membrane progesterone receptors in the CNS</li> <li>Allopregnanolone (derivative) is a potent modulator of GABAA receptors involved in the regulation of myelin gene expression in the periphery</li> <li>Maintenance of pregnancy</li> <li>Exerts inhibitory effects on estrogens</li> </ul>                                | <ul style="list-style-type: none"> <li>Reproduction</li> <li>Anti-ovulatory</li> <li>Neuroregulatory</li> </ul>                           | Contraceptives                               | DB00396 | 5994     | 45, 82  |



|                                             |                                                                                                                                                                                                                |                                                                                                                                                                                                                                                                                                                                                                                                                                                                                                                                                                                               |                                                                                                                                              |                                                                                                                    |                  |                  |                              |
|---------------------------------------------|----------------------------------------------------------------------------------------------------------------------------------------------------------------------------------------------------------------|-----------------------------------------------------------------------------------------------------------------------------------------------------------------------------------------------------------------------------------------------------------------------------------------------------------------------------------------------------------------------------------------------------------------------------------------------------------------------------------------------------------------------------------------------------------------------------------------------|----------------------------------------------------------------------------------------------------------------------------------------------|--------------------------------------------------------------------------------------------------------------------|------------------|------------------|------------------------------|
| Shikimic Acid                               | <ul style="list-style-type: none"> <li>• Cyclohexenecarboxylic acid from star anise</li> <li>• Hydrogenated metabolite of the shikimate pathway</li> <li>• C<sub>7</sub>H<sub>10</sub>O<sub>5</sub></li> </ul> | <ul style="list-style-type: none"> <li>• Precursor for the synthesis of aromatic compounds in plants and microorganism</li> <li>• Precursor for the synthesis of the neuraminidase inhibitor Oseltamivir (Tamiflu®) and the antibiotic (6S)-6-fluoroshikimic acid</li> </ul>                                                                                                                                                                                                                                                                                                                  | <ul style="list-style-type: none"> <li>• Anti-influenza</li> <li>• Antioxidant</li> <li>• Anti-inflammatory</li> <li>• Anti-tumor</li> </ul> | Shikimic acid derivative in Tamiflu® is approved                                                                   | -                | 8742             | 101                          |
| Sobetirome (GC-1)                           | <ul style="list-style-type: none"> <li>• Diphenylmethane</li> <li>• C<sub>20</sub>H<sub>24</sub>O<sub>4</sub></li> </ul>                                                                                       | <ul style="list-style-type: none"> <li>• Selective T3 agonist</li> <li>• “Devoid of the adverse effects associated with hyperthyroidism and unique among thyromimetics for its ability to cross the blood-brain barrier and distribute to the CNS from a systemic dose”</li> <li>• Regulates myelin gene transcription and biochemistry in the CNS via agonism at thyroid receptors (TR)</li> <li>• 10-fold selectivity for TRβ over TRα</li> </ul>                                                                                                                                           | <ul style="list-style-type: none"> <li>• Antilipidemic</li> <li>• Antiatherosclerotic</li> </ul>                                             | -                                                                                                                  | DB07425          | 9862248          | 66, 201                      |
| T3 hormone (Liothyronine)                   | <ul style="list-style-type: none"> <li>• 3,5,3'-triiodothyronine</li> <li>• C<sub>15</sub>H<sub>12</sub>I<sub>3</sub>NO<sub>4</sub></li> </ul>                                                                 | <ul style="list-style-type: none"> <li>• Increases energy expenditure and carbohydrate and protein metabolism</li> <li>• Stimulates growth, maturation and metabolism of tissues</li> <li>• Involved in myelination and development of synaptic processes by regulating the timing of OPC differentiation and maturation</li> </ul>                                                                                                                                                                                                                                                           | <ul style="list-style-type: none"> <li>• Endocrine</li> <li>• Neuroregulatory</li> </ul>                                                     | Hypothyroidism                                                                                                     | DB00279          | 5920             | 66, 208, 211                 |
| Vitamin D3 (calcitriol and cholecalciferol) | <ul style="list-style-type: none"> <li>• Lipid-soluble secosteroids</li> <li>• Vitamin D metabolites</li> </ul>                                                                                                | <ul style="list-style-type: none"> <li>• Ingested through diet or produced in the skin upon exposure to ultraviolet irradiation</li> <li>• Cholecalciferol is the endogenous form of vitamin D</li> <li>• Calcitriol is the biologically active form of vitamin D (1,25-dihydroxyvitamin D3) that acts as a calcitrophic hormone</li> <li>• Immune modulation through receptors expressed on macrophages, dendritic cells, B and T cells</li> <li>• Receptor ligation on osteoblasts regulates transcription</li> <li>• Regulator of peripheral calcium and phosphorus homeostasis</li> </ul> | <ul style="list-style-type: none"> <li>• Immunomodulator</li> <li>• Anti-osteoporotic</li> <li>• Antioxidant</li> </ul>                      | <ul style="list-style-type: none"> <li>• Hypoparathyroidism</li> <li>• Vitamin D deficiency and rickets</li> </ul> | DB00169, DB00136 | 5280795, 5280453 | 111, 131, 132, 139, 143, 178 |
| Vitamin K1 (Phylloquinone)                  | <ul style="list-style-type: none"> <li>• Fat-soluble dietary form of vitamin K</li> <li>• C<sub>31</sub>H<sub>46</sub>O<sub>2</sub></li> </ul>                                                                 | <ul style="list-style-type: none"> <li>• Cofactor in the post-translational carboxylation of proteins required for blood coagulation (Factors II (prothrombin), VII, IX and X)</li> <li>• Metabolites of vitamin K accumulate in the brain</li> </ul>                                                                                                                                                                                                                                                                                                                                         | Clotting cofactor                                                                                                                            | Coagulation disorders                                                                                              | DB01022          | 5284607          | 143                          |

**Table S5D. Small molecule protonophores**

| Name                               | Structure                                                                                              | Mechanism(s) of action                                                                                                          | Biological effect(s) | FDA approved indication(s) | Accession number |             | Article Number |
|------------------------------------|--------------------------------------------------------------------------------------------------------|---------------------------------------------------------------------------------------------------------------------------------|----------------------|----------------------------|------------------|-------------|----------------|
|                                    |                                                                                                        |                                                                                                                                 |                      |                            | DrugBank         | PubChem CID |                |
| 2,4-dinitrophenol (DNP) i.e. MP101 | Related to trinitrophenol (picric acid)<br>C <sub>6</sub> H <sub>4</sub> N <sub>2</sub> O <sub>5</sub> | Uncouples oxidative phosphorylation by allowing protons to leak across the inner mitochondrial membrane and bypass ATP synthase | Metabolic stimulant  | -                          | DB04528          | 1493        | 9              |
| DNP Pro-Drug MP201                 | Related to trinitrophenol (picric acid)<br>C <sub>6</sub> H <sub>4</sub> N <sub>2</sub> O <sub>5</sub> | Uncouples oxidative phosphorylation by allowing protons to leak across the inner mitochondrial membrane and bypass ATP synthase | Metabolic stimulant  | -                          | -                | -           | 9, 86          |

**Table S5E. Small molecule organic compound mixtures**

| Name                            | Formulation                                                                                                                                                                                                                                                                                                                                                                                          | Mechanism(s) of action                                                                                                                                                                                                                                                                   | Biological effect(s)                                                                                                                                                | FDA approved indication(s) | Accession number |             | Article Number |
|---------------------------------|------------------------------------------------------------------------------------------------------------------------------------------------------------------------------------------------------------------------------------------------------------------------------------------------------------------------------------------------------------------------------------------------------|------------------------------------------------------------------------------------------------------------------------------------------------------------------------------------------------------------------------------------------------------------------------------------------|---------------------------------------------------------------------------------------------------------------------------------------------------------------------|----------------------------|------------------|-------------|----------------|
|                                 |                                                                                                                                                                                                                                                                                                                                                                                                      |                                                                                                                                                                                                                                                                                          |                                                                                                                                                                     |                            | DrugBank         | PubChem CID |                |
| Anthocyanins (ANT)              | <ul style="list-style-type: none"> <li>Phenolic phytonutrients extracted and purified from grape skin</li> <li>Flavonoid pigments</li> <li>Composition: malvidin, peonidin, cyanidin, delphinidin, petunidin and pelargonidin</li> </ul>                                                                                                                                                             | <ul style="list-style-type: none"> <li>RNS and ROS scavenging</li> <li>Metabolic precursors</li> <li>Can suppress immune cell migration and proinflammatory cytokine expression</li> </ul>                                                                                               | <ul style="list-style-type: none"> <li>Antioxidant</li> <li>Anti-inflammatory</li> </ul>                                                                            | -                          | -                | 145858      | 24             |
| <i>Cucurbita maxima</i> extract | <ul style="list-style-type: none"> <li>Petroleum ether extract of pumpkin seed</li> <li>Composition: "30% unsaturated fixed oil (linoleic and oleic fatty acids), triterpenoids flavonoids, coumarins, saponins, cucurbitacin, vitamins, minerals notably zinc, phytosterols, amino acid known as cucurbitin... high amount of carotenoid content which include lutein and beta-carotene"</li> </ul> | <ul style="list-style-type: none"> <li>RNS and ROS scavenging</li> <li>Metabolic precursors</li> </ul>                                                                                                                                                                                   | <ul style="list-style-type: none"> <li>Anthelminthic</li> <li>Antioxidant</li> <li>Anti-inflammatory</li> </ul>                                                     | -                          | -                | -           | 127            |
| Epimedium flavonoids            | <ul style="list-style-type: none"> <li>Primary component of horny goat weed plant (<i>Epimedium Sagittatum</i>) extract</li> <li>Secondary plant metabolites derived from phenylalanine</li> <li>Composition<sup>17</sup>: Icaria, epimedin A, B, and C, hexandraise A</li> </ul>                                                                                                                    | <ul style="list-style-type: none"> <li>Used in traditional Chinese medicine as a kidney tonic and antirheumatic medicine</li> <li>Prenylated flavonoids demonstrated to be the main bioactive components</li> <li>Icaria is a phosphodiesterase-5 inhibitor and phytoestrogen</li> </ul> | <ul style="list-style-type: none"> <li>Osteoprotective</li> <li>Neuroprotective</li> <li>Cardiovascular</li> <li>Anti-inflammatory</li> <li>Reproductive</li> </ul> | -                          | DB12052          | 5318997     | 99             |
| Kolaviron <sup>18</sup>         | <ul style="list-style-type: none"> <li>Biflavonoid complex isolated from seeds of the <i>Garcinia kola</i> plant</li> <li>Composition: Kolaflavonone, garcinia biflavonones 1 and 2</li> </ul>                                                                                                                                                                                                       | <ul style="list-style-type: none"> <li>Prevents lipid peroxidation and protein damage</li> <li>Inhibits intracellular ROS production</li> </ul>                                                                                                                                          | <ul style="list-style-type: none"> <li>Anti-inflammatory</li> <li>Antioxidant</li> <li>Anti-bacterial/fungal</li> <li>Cytoprotective</li> </ul>                     | -                          | -                | 155169      | 136, 137       |

|                      |                                                                                                                                                                                                                                                                                                                                                         |                                                                                                                                                                                                                                                                                                                                   |                                                                                                                                                               |                                                                     |         |          |    |
|----------------------|---------------------------------------------------------------------------------------------------------------------------------------------------------------------------------------------------------------------------------------------------------------------------------------------------------------------------------------------------------|-----------------------------------------------------------------------------------------------------------------------------------------------------------------------------------------------------------------------------------------------------------------------------------------------------------------------------------|---------------------------------------------------------------------------------------------------------------------------------------------------------------|---------------------------------------------------------------------|---------|----------|----|
| Polyprenols          | <ul style="list-style-type: none"> <li>• Bioactive long-chain isoprenoid alcohols</li> <li>• Contain a hydroxyl group and a long unsaturated isoprenyl chain</li> <li>• Chain length of natural polyprenols varies from 6 to 40 isoprene units</li> <li>• Isolated from the green verdure of <i>Picea abies</i> (L.) Karst</li> </ul>                   | <ul style="list-style-type: none"> <li>• Precursors to terpenes and steroids</li> <li>• Modified to metabolically active forms via <math>\alpha</math>-saturation and phosphorylation in the liver</li> <li>• Involved in cell wall biosynthesis</li> <li>• Regulators of cell proliferation</li> <li>• ROS scavenging</li> </ul> | <ul style="list-style-type: none"> <li>• Hepatoprotective</li> <li>• Neuroprotective</li> <li>• Antioxidant</li> <li>• Mildly immune-modulatory</li> </ul>    | Ropren® has completed a phase III clinical trial                    | -       | -        | 87 |
| Sativex (Nabiximols) | <ul style="list-style-type: none"> <li>• Combination of phytocannabinoids</li> <li>• Equivalent amounts of <math>\Delta</math>9-tetrahydrocannabinol (<math>\Delta</math>9-THC) and cannabidiol (CBD)-botanical drug substance (BDS)</li> <li>• Contains other minor cannabinoids, flavonoids and terpenes from two cannabis plant varieties</li> </ul> | <ul style="list-style-type: none"> <li>• Combination of THC and CBD mechanisms of action</li> <li>• Partial agonists of CB1 and CB2 receptors</li> </ul>                                                                                                                                                                          | <ul style="list-style-type: none"> <li>• Anti-inflammatory</li> <li>• Antioxidant</li> <li>• Psychoactive (analgesic, euphoric and anticonvulsive)</li> </ul> | Approved for spasticity and neuropathic pain in MS by Health Canada | DB14011 | 44148067 | 47 |

**Table S5F. Protein biologics**

| Name                 | Classification | Structure                                                                                                                      | Mechanism(s) of action                                                                                                                                                                                                                                                                                                                                                        | Biological effect(s)                                                                                                            | FDA approved indication(s)                                                      | Accession Number |             |         | Article Number |
|----------------------|----------------|--------------------------------------------------------------------------------------------------------------------------------|-------------------------------------------------------------------------------------------------------------------------------------------------------------------------------------------------------------------------------------------------------------------------------------------------------------------------------------------------------------------------------|---------------------------------------------------------------------------------------------------------------------------------|---------------------------------------------------------------------------------|------------------|-------------|---------|----------------|
|                      |                |                                                                                                                                |                                                                                                                                                                                                                                                                                                                                                                               |                                                                                                                                 |                                                                                 | DrugBank         | PubChem CID | UniProt |                |
| Anti-EphrinB3        | Antibodies     | Recombinant Human Ephrin-B3 Fc IgG                                                                                             | <ul style="list-style-type: none"> <li>Blockade of EphrinB</li> <li>EphrinB is a transmembrane signalling protein that negatively regulates the formation of corticospinal tract axons, and is expressed on adult CNS oligodendrocytes</li> </ul>                                                                                                                             | Neuroregenerative                                                                                                               | -                                                                               | -                | -           | -       | 175            |
| Anti-Nogo-A          | Antibodies     | Highly purified mouse monoclonal IgG1 clone 11C7                                                                               | <ul style="list-style-type: none"> <li>Neutralization of Nogo-A</li> <li>Nogo-A is an inhibitor of neuronal growth and plasticity, and is expressed on oligodendrocytes</li> </ul>                                                                                                                                                                                            | Neuroregenerative                                                                                                               | Anti-Nogo-A GSK1223249 tested in phase I trial for RRMS (NCT01435993)           | -                | -           | -       | 72             |
| Anti-SEMA4D          | Antibodies     | <ul style="list-style-type: none"> <li>Mouse monoclonal IgG1 clone 67-2</li> <li>Mouse and human reactivity</li> </ul>         | <ul style="list-style-type: none"> <li>Blocking of SEMA4D signals</li> <li>SEMA4D has multiple roles, including:                             <ul style="list-style-type: none"> <li>Axon-guidance factor</li> <li>Glial activation</li> <li>Inhibition of OPC migration and differentiation</li> <li>Regulation of blood-brain barrier tight junctions</li> </ul> </li> </ul> | <ul style="list-style-type: none"> <li>Anti-inflammatory</li> <li>Anti-proliferation/cancer</li> <li>Neuroprotective</li> </ul> | Anti-SEMA4D Pepinemab has completed phase I clinical trial for MS (NCT01764737) | -                | -           | -       | 171            |
| Elezanumab (ABT-555) | Antibodies     | <ul style="list-style-type: none"> <li>Fully humanized monoclonal IgG</li> <li>Human, NHP, rat and mouse reactivity</li> </ul> | <ul style="list-style-type: none"> <li>Specific for repulsive guidance molecule A (RGMa)</li> <li>RGMa inhibits axonal growth, myelination and oligodendrocyte regeneration</li> </ul>                                                                                                                                                                                        | <ul style="list-style-type: none"> <li>Neuroprotective</li> <li>Neuroregenerative</li> </ul>                                    | Ongoing phase II trials for RRMS and PMS (NCT03737851) (NCT03737812)            | DB15240          | -           | -       | 35             |
| Temelimab (GNbAC1)   | Antibodies     | Humanized monoclonal IgG4                                                                                                      | <ul style="list-style-type: none"> <li>Targets multiple sclerosis-associated retrovirus viral envelope protein (HERV-W Env), which is expressed in MS CNS lesions</li> <li>Reduces HERV-W Env-induced inhibition of OPC differentiation and nitrosative stress</li> <li>HERV-W Env promotes inflammatory microglial polarization and axonal degeneration</li> </ul>           | Gliomodulatory                                                                                                                  | Recruiting for phase IIa trial in RRMS (NCT04480307)                            | DB15634          | -           | -       | 12             |
| Anti-LINGO-1         | Antibodies     | Clone 1A7: Human IgG1 monoclonal antibody                                                                                      | <ul style="list-style-type: none"> <li>Antagonist of LINGO-1</li> </ul>                                                                                                                                                                                                                                                                                                       | <ul style="list-style-type: none"> <li>Neuroregenerative</li> <li>Neuroprotective</li> </ul>                                    | -                                                                               | -                | -           | -       | 61, 210        |

|                                                  |                               |                                                                                                                           |                                                                                                                                |                                                                                                                                                                                                                                                          |                                                                                                                                                      |                                                |         |         |        |                  |
|--------------------------------------------------|-------------------------------|---------------------------------------------------------------------------------------------------------------------------|--------------------------------------------------------------------------------------------------------------------------------|----------------------------------------------------------------------------------------------------------------------------------------------------------------------------------------------------------------------------------------------------------|------------------------------------------------------------------------------------------------------------------------------------------------------|------------------------------------------------|---------|---------|--------|------------------|
|                                                  |                               | with human and rat reactivity                                                                                             | <ul style="list-style-type: none"> <li>• Clone 3B5: Murine IgG1 monoclonal antibody with human and mouse reactivity</li> </ul> | <ul style="list-style-type: none"> <li>• LINGO-1 is an inhibitor of oligodendrocyte differentiation and axonal regeneration</li> </ul>                                                                                                                   |                                                                                                                                                      |                                                |         |         |        |                  |
| Opicinumab (BIIB033)                             | Antibodies                    | Human IgG1 monoclonal antibody                                                                                            | <ul style="list-style-type: none"> <li>• Binds human and mouse LINGO-1</li> </ul>                                              | <ul style="list-style-type: none"> <li>• Antagonist of LINGO-1</li> <li>• LINGO-1 is an inhibitor of oligodendrocyte differentiation and axonal regeneration</li> </ul>                                                                                  | <ul style="list-style-type: none"> <li>• Neuroregenerative</li> <li>• Neuroprotective</li> </ul>                                                     | Ongoing phase II trial in RRMS (NCT03222973)   | DB14959 | -       | -      | 23, 61, 50, 116  |
| HlgM12                                           | Antibodies                    | Human serum derived IgM12                                                                                                 |                                                                                                                                | <ul style="list-style-type: none"> <li>• Binds neurons and induces neurite extension</li> <li>• Binds gangliosides GD1a and GT1b with high affinity</li> <li>• Increases brainstem NAA concentrations</li> </ul>                                         | Neuroprotection                                                                                                                                      | -                                              | -       | -       | -      | 194              |
| rHlgM12                                          | Antibodies                    | Monoclonal IgM expressed from two plasmids encoding the heavy and light chain coding sequences and the human J chain      |                                                                                                                                | <ul style="list-style-type: none"> <li>• Binds neurons and induces neurite extension</li> <li>• Binds gangliosides GD1a and GT1b with high affinity</li> <li>• Increases brainstem NAA concentrations</li> </ul>                                         | Neuroprotection                                                                                                                                      | -                                              | -       | -       | -      | 196              |
| rHlgM22                                          | Antibodies                    | Recombinant human IgM with human H and L chains, murine J chain                                                           |                                                                                                                                | <ul style="list-style-type: none"> <li>• Binds to oligodendrocytes and myelin in the CNS</li> <li>• Promotes oligodendrocyte process outgrowth</li> <li>• Increases brainstem NAA concentrations</li> </ul>                                              | Remyelination                                                                                                                                        | Completed phase I trial for RRMS (NCT02398461) | -       | -       | -      | 36, 43, 122, 195 |
| Erythropoietin (EPO)                             | Growth and regulatory factors | <ul style="list-style-type: none"> <li>• Glycoprotein cytokine</li> <li>• 165 amino acids</li> </ul>                      |                                                                                                                                | <ul style="list-style-type: none"> <li>• Hematopoietic growth factor</li> <li>• Stimulates erythrocyte production</li> <li>• Involved in developmental differentiation of neuronal precursor cells</li> <li>• Induces differentiation of OPCs</li> </ul> | <ul style="list-style-type: none"> <li>• Anti-oxidative</li> <li>• Anti-inflammatory</li> <li>• Anti-apoptotic</li> <li>• Neuroprotective</li> </ul> | Anemia                                         | DB00016 | -       | P07321 | 150, 168         |
| Fibroblast growth factor 2 (FGF2)                | Growth and regulatory factors | <ul style="list-style-type: none"> <li>• Cell signaling protein</li> <li>• Related to interleukin 1-beta</li> </ul>       |                                                                                                                                | <ul style="list-style-type: none"> <li>• Interacts with four cell surface receptor subtypes</li> <li>• Mediator of neurogenesis</li> <li>• Binds to heparin and heparan sulfate</li> </ul>                                                               | <ul style="list-style-type: none"> <li>• Angiogenic</li> <li>• Mitogenic</li> </ul>                                                                  | -                                              | -       | 5486993 | P13109 | 7                |
| Fibroblast growth factor 21 (FGF21) <sup>1</sup> | Growth and regulatory factors | <ul style="list-style-type: none"> <li>• Hormone/ myokine</li> <li>• 181 amino acid peptide derived from a 209</li> </ul> |                                                                                                                                | <ul style="list-style-type: none"> <li>• Stimulates oxidation of fatty acids and generation of ketone bodies</li> <li>• Inhibitor of lipogenesis</li> </ul>                                                                                              | Metabolic and endocrine regulation                                                                                                                   | PEGylated FGF21 in clinical                    | DB15365 | -       | Q9JN1  | 94               |

|                                              |                               |                                                                                                                                                                                                                                                       |                                                                                                                                                                                                                                                                                                                        |                                                                                               |                                                                            |         |         |        |          |
|----------------------------------------------|-------------------------------|-------------------------------------------------------------------------------------------------------------------------------------------------------------------------------------------------------------------------------------------------------|------------------------------------------------------------------------------------------------------------------------------------------------------------------------------------------------------------------------------------------------------------------------------------------------------------------------|-----------------------------------------------------------------------------------------------|----------------------------------------------------------------------------|---------|---------|--------|----------|
|                                              |                               | amino acid mature protein                                                                                                                                                                                                                             | <ul style="list-style-type: none"> <li>Stimulates glucose uptake in differentiated adipocytes</li> <li>Crosses the blood-brain barrier</li> </ul>                                                                                                                                                                      |                                                                                               | trials for liver disease                                                   |         |         |        |          |
| Insulin-like growth factor 1 (IGF-1)         | Growth and regulatory factors | <ul style="list-style-type: none"> <li>Mitogenic globular polypeptide</li> <li>70 amino acids</li> </ul>                                                                                                                                              | <ul style="list-style-type: none"> <li>Similar to insulin by structure and function, but has greater growth-promoting activity</li> <li>Signals through the tyrosine kinase type I receptor (IGF-IR)</li> <li>Acts as a neurotrophin for motor nerves</li> </ul>                                                       | <ul style="list-style-type: none"> <li>Neuroprotective</li> <li>Tissue growth</li> </ul>      | IGF-1 deficiency                                                           | DB01277 | 5748425 | P08025 | 69       |
| Leukaemia inhibitory factor (LIF)            | Growth and regulatory factors | <ul style="list-style-type: none"> <li>IL-6 family cytokine and growth factor</li> <li>180 amino acids</li> </ul>                                                                                                                                     | <ul style="list-style-type: none"> <li>Promotes developmental myelination</li> <li>Promotes oligodendrocyte maturation after myelin injury</li> <li>(156) Delivered in poly(lactide-co-glycolide) nanoparticles “targeted using NG2 chondroitin sulphate proteoglycan antibodies to OPCs”</li> </ul>                   | <ul style="list-style-type: none"> <li>Neuroregenerative</li> <li>Immunomodulatory</li> </ul> | In clinical trials for infertility                                         | DB06562 | -       | P09056 | 110, 156 |
| Macrophage colony-stimulating factor (M-CSF) | Growth and regulatory factors | <ul style="list-style-type: none"> <li>Cytokine CSF1</li> <li>Three different biologically active dimeric isoforms: proteoglycan, glycoprotein and cell surface protein</li> </ul>                                                                    | <ul style="list-style-type: none"> <li>Hematopoietic growth factor</li> <li>Regulates cell survival, proliferation and differentiation of myeloid cells</li> <li>Promotes anti-inflammatory microglial phenotype and the release of trophic factors</li> <li>Regulates the phagocytic activity of microglia</li> </ul> | Immunomodulatory                                                                              | Related drug Sargramostim completed phase II trial for Alzheimer's disease | -       | -       | P07141 | 95       |
| Nerve Growth Factor (NGF)                    | Growth and regulatory factors | <ul style="list-style-type: none"> <li>Signalling protein</li> <li>Endosomal and secreted</li> </ul>                                                                                                                                                  | <ul style="list-style-type: none"> <li>Regulates the growth, maintenance, proliferation and survival of neurons</li> <li>Involved in allergic inflammatory responses</li> </ul>                                                                                                                                        | Neurotrophic                                                                                  | -                                                                          | DB12620 | -       | P01139 | 184      |
| Neuregulin-1 (rhNrg-1β1 peptide)             | Growth and regulatory factors | <ul style="list-style-type: none"> <li>Recombinant human peptide with active epidermal growth factor-like domain</li> <li>Multiple trans-membrane and secreted isoforms</li> <li>Delivered in poly (lactic-co-glycolic) acid nanoparticles</li> </ul> | <ul style="list-style-type: none"> <li>Cell adhesion molecule</li> <li>Acts as a neurotrophin by regulating neurotransmission and synaptic plasticity</li> <li>Involved in the regulation of oligodendrocytes and neurons</li> </ul>                                                                                   | Neuroregulatory                                                                               | Heart failure drug Neucardin fast-tracked for FDA approval                 | -       | -       | Q02297 | 83       |

|                                           |                                      |                                                                                                                                                                                                            |                                                                                                                                                                                                                                           |                                                                                                       |                                                  |         |         |        |     |
|-------------------------------------------|--------------------------------------|------------------------------------------------------------------------------------------------------------------------------------------------------------------------------------------------------------|-------------------------------------------------------------------------------------------------------------------------------------------------------------------------------------------------------------------------------------------|-------------------------------------------------------------------------------------------------------|--------------------------------------------------|---------|---------|--------|-----|
| Thymosin beta 4                           | Growth and regulatory factors        | <ul style="list-style-type: none"> <li>• Small peptide</li> <li>• 43 amino acids</li> </ul>                                                                                                                | Role in actin polymerization, cell motility and organization of the cytoskeleton                                                                                                                                                          | <ul style="list-style-type: none"> <li>• Angiogenesis</li> <li>• Tissue repair</li> </ul>             | Completed numerous trials for wound healing      | DB12003 | -       | P20065 | 213 |
| Transforming growth factor-beta1 (TGF-β1) | Growth and regulatory factors        | <ul style="list-style-type: none"> <li>• Highly pleiotropic cytokine</li> <li>• 390 amino acid precursor processed to a mature peptide of 112 amino acids</li> </ul>                                       | <ul style="list-style-type: none"> <li>• Binds TGF-beta Receptors I and II</li> <li>• Produces a signalling cascade that regulates the transcription of multiple genes related to immune function, cell survival and migration</li> </ul> | Immunomodulatory (among others)                                                                       | -                                                | -       | -       | P04202 | 65  |
| Tuftsin                                   | Growth and regulatory factors        | <ul style="list-style-type: none"> <li>• Tetrapeptide located in the Fc-domain of the IgG heavy chain</li> <li>• C<sub>21</sub>H<sub>40</sub>N<sub>8</sub>O<sub>6</sub></li> </ul>                         | <ul style="list-style-type: none"> <li>• Secreted by splenocytes</li> <li>• Stimulates the phagocytic activity of blood polymorphonuclear leukocytes and neutrophils</li> </ul>                                                           | Immunostimulant                                                                                       | -                                                | -       | 156080  | -      | 181 |
| Galectin-1                                | Growth and regulatory factors, Other | <ul style="list-style-type: none"> <li>• Highly conserved animal lectin</li> <li>• 135 amino acids</li> <li>• Contains a carbohydrate recognition domain (CRD) that binds complex carbohydrates</li> </ul> | Modulates cell-cell and cell-glycan interactions by binding beta galactosides                                                                                                                                                             | Immunomodulatory (among others)                                                                       | -                                                | -       | -       | P16045 | 154 |
| Ancrod (Viprinex)                         | Inhibitors and proteases             | Thrombin-like serine protease originally isolated from the venom of the Malayan pit viper                                                                                                                  | <ul style="list-style-type: none"> <li>• Defibrinogenating agent</li> <li>• Cleaves fibrinogen to small peptides for rapid clearance</li> </ul>                                                                                           | Anticoagulant                                                                                         | Thrombosis                                       | DB05099 | -       | P26324 | 141 |
| Apamin                                    | Inhibitors and proteases             | <ul style="list-style-type: none"> <li>• Derived from dry bee venom (2-3% apamin peptide)</li> <li>• Neurotoxin</li> <li>• 18 amino acids</li> </ul>                                                       | <ul style="list-style-type: none"> <li>• Selectively blocks axonal Kv1.3 potassium channels in the central nervous system, as well as on immune cells and microglia</li> <li>• Blood-brain barrier permeable</li> </ul>                   | <ul style="list-style-type: none"> <li>• Neuroprotective</li> <li>• Anti-inflammatory</li> </ul>      | Completed phase II trial for Parkinson's disease | -       | -       | P01500 | 118 |
| P110                                      | Inhibitors and proteases             | Seven amino acid peptide conjugated to the cell permeating peptide TAT47-57 for intracellular delivery                                                                                                     | <ul style="list-style-type: none"> <li>• Selective mitochondrial Drp1 peptide inhibitor</li> <li>• Hyperactivation of Drp1 causes oxidative stress and oligodendrocyte death</li> </ul>                                                   | <ul style="list-style-type: none"> <li>• Antioxidant</li> <li>• Neuroprotective</li> </ul>            | -                                                | -       | -       | -      | 102 |
| Pam2CSK4 (P2C)                            | Inhibitors and proteases             | <ul style="list-style-type: none"> <li>• Synthetic diacylated lipopeptide</li> <li>• C<sub>65</sub>H<sub>126</sub>N<sub>10</sub>O<sub>12</sub>S</li> </ul>                                                 | <ul style="list-style-type: none"> <li>• TLR2 ligand</li> <li>• Repeated administered at low dose induces systemic TLR2 tolerance</li> </ul>                                                                                              | <ul style="list-style-type: none"> <li>• Innate immune response activation (adjuvant-like)</li> </ul> | -                                                | -       | 9989023 | -      | 190 |
| XPro1595                                  | Inhibitors and proteases             | <ul style="list-style-type: none"> <li>• Dominant-negative TNF analogue</li> </ul>                                                                                                                         | <ul style="list-style-type: none"> <li>• Second generation selective inhibitor of soluble TNF</li> <li>• Blood-brain barrier permeable</li> </ul>                                                                                         | Immunosuppressive                                                                                     | Ongoing phase I trial in                         | -       | -       | -      | 80  |

|                                           |                                                       |                                                                                                                                                                             |                                                                                                                                                                                                                                                                                                                |                                                                                                        |                                                                                             |         |         |        |          |  |
|-------------------------------------------|-------------------------------------------------------|-----------------------------------------------------------------------------------------------------------------------------------------------------------------------------|----------------------------------------------------------------------------------------------------------------------------------------------------------------------------------------------------------------------------------------------------------------------------------------------------------------|--------------------------------------------------------------------------------------------------------|---------------------------------------------------------------------------------------------|---------|---------|--------|----------|--|
|                                           |                                                       | <ul style="list-style-type: none"> <li>Engineered mutations prevent binding to TNFR1 and TNFR2</li> </ul>                                                                   | <ul style="list-style-type: none"> <li>“Exchanges subunits with and thus destroys the native homotrimeric soluble TNF ligand, while fully preserving transmembrane TNF activity”</li> </ul>                                                                                                                    |                                                                                                        | Alzheimer's disease                                                                         |         |         |        |          |  |
| Protamine                                 | Inhibitors and proteases, Other                       | <ul style="list-style-type: none"> <li>Natural cationic polypeptide</li> <li>Arginine-rich for DNA binding</li> <li>49-54 amino acids</li> </ul>                            | <ul style="list-style-type: none"> <li>Endogenous function is chromatin condensation in sperm</li> <li>Used clinically to halt the anticoagulant effects of heparin</li> <li>Delays the absorption of insulin</li> </ul>                                                                                       | <ul style="list-style-type: none"> <li>‘Anti-anticoagulation’</li> <li>Chromatin regulation</li> </ul> | Heparin overdose                                                                            | DB13700 | -       | P04554 | 91       |  |
| TnP peptide                               | Inhibitors and proteases, Other                       | <ul style="list-style-type: none"> <li>Small stable synthetic peptide derived from fish venom</li> <li>13 amino acids</li> </ul>                                            | “Systemic and CNS localized effects that result in inhibition of traffic of inflammatory leukocyte to CNS and demyelination”                                                                                                                                                                                   | <ul style="list-style-type: none"> <li>Anti-inflammatory</li> <li>Anti-allergic</li> </ul>             | -                                                                                           | -       | -       | -      | 89       |  |
| Glatiramer Acetate (GA)                   | Peptide mimetics and decoys                           | <ul style="list-style-type: none"> <li>A mixture of synthetic polypeptides</li> <li>Random polymer of alanine, glutamic acid, lysine and tyrosine</li> </ul>                | <ul style="list-style-type: none"> <li>Neurotrophin mimetic</li> <li>Structurally similar to myelin basic protein</li> </ul>                                                                                                                                                                                   | Immunomodulatory                                                                                       | RRMS (Copaxone)                                                                             | DB05259 | 3081884 | -      | 42       |  |
| Plexin-A1 antagonist peptide (MTP-PlexA1) | Peptide mimetics and decoys                           | <ul style="list-style-type: none"> <li>Synthetic mimic peptide</li> <li>T1240 to K1268 of the transmembrane domain of Plexin-A1</li> </ul>                                  | <ul style="list-style-type: none"> <li>Transducer of Sema3A inhibiting signals in neurons</li> <li>Blocks the anti-migratory and anti-differentiation effect of Sema3A in oligodendrocytes</li> </ul>                                                                                                          | Neuroregulatory                                                                                        | -                                                                                           | -       | -       | P70206 | 18       |  |
| Intracellular Sigma Peptide (ISP)         | Peptide mimetics and decoys, Inhibitors and proteases | Peptide mimic of the wedge domain of PTP $\sigma$ connected to TAT sequence to enable blood-brain barrier crossing                                                          | <ul style="list-style-type: none"> <li>Inhibitor of proteoglycan receptor protein tyrosine phosphatase sigma, PTP<math>\sigma</math></li> <li>PTP<math>\sigma</math> is expressed on neural and glial cells in the CNS</li> <li>PTP<math>\sigma</math> binds repair inhibitory molecules like CSPGs</li> </ul> | Neuroregenerative                                                                                      | NVG-291, a close analog of ISP, is in preparation for clinical trials in spinal cord injury | -       | -       | BOV2N1 | 103, 129 |  |
| TAT-G-G pep                               | Peptide mimetics and decoys, Inhibitors and proteases | <ul style="list-style-type: none"> <li>GluR2NT1-3-2 peptide fused to the cell membrane transduction domain of HIV-1 TAT peptide to enable intracellular delivery</li> </ul> | <ul style="list-style-type: none"> <li>Blocking of GluR2–GAPDH complex and glutamate receptor-mediated excitotoxicity without interfering with basal neurotransmission</li> <li>Protects from excitotoxicity induced demyelination, axonal damage, and loss of neurons</li> </ul>                              | Neuroprotective                                                                                        | -                                                                                           | -       | -       | -      | 209      |  |



**Table S5G. Cellular biologics**

| Cell type              | Tissue source                                   | Modifications    | Mechanism(s) of action <sup>2,3</sup>                                                                                                                      | Biological effect(s)                                                                                                                               | Article Number |
|------------------------|-------------------------------------------------|------------------|------------------------------------------------------------------------------------------------------------------------------------------------------------|----------------------------------------------------------------------------------------------------------------------------------------------------|----------------|
| Embryonic stem cells   | Murine blastocyte                               | None             | <ul style="list-style-type: none"> <li>• Pluripotent and self-renewing</li> <li>• Can be maintained in an undifferentiated state indefinitely</li> </ul>   | Cell/ tissue repair and replacement                                                                                                                | 147            |
| Mesenchymal stem cells | Human autologous bone marrow (RR/SPMS patients) | Culture-expanded | <ul style="list-style-type: none"> <li>• Multipotent and self-renewing</li> <li>• Cytokine and neurotrophin production</li> <li>• Tissue repair</li> </ul> | <ul style="list-style-type: none"> <li>• Cellular replacement</li> <li>• Neurogenesis</li> <li>• Angiogenesis</li> <li>• Synaptogenesis</li> </ul> | 49             |
| Mesenchymal stem cells | Canine adipose tissue                           | None             | <ul style="list-style-type: none"> <li>• Multipotent and self-renewing</li> <li>• Cytokine and neurotrophin production</li> <li>• Tissue repair</li> </ul> | <ul style="list-style-type: none"> <li>• Cellular replacement</li> <li>• Neurogenesis</li> <li>• Angiogenesis</li> <li>• Synaptogenesis</li> </ul> | 1              |
| Mesenchymal stem cells | Embryonic stem cell line                        | None             | <ul style="list-style-type: none"> <li>• Multipotent and self-renewing</li> <li>• Cytokine and neurotrophin production</li> <li>• Tissue repair</li> </ul> | <ul style="list-style-type: none"> <li>• Cellular replacement</li> <li>• Neurogenesis</li> <li>• Angiogenesis</li> <li>• Synaptogenesis</li> </ul> | 78             |
| Mesenchymal stem cells | Human adipose tissue                            | None             | <ul style="list-style-type: none"> <li>• Multipotent and self-renewing</li> <li>• Cytokine and neurotrophin production</li> <li>• Tissue repair</li> </ul> | <ul style="list-style-type: none"> <li>• Cellular replacement</li> <li>• Neurogenesis</li> <li>• Angiogenesis</li> <li>• Synaptogenesis</li> </ul> | 54, 153        |
| Mesenchymal stem cells | Human bone marrow (iliac crest)                 | None             | <ul style="list-style-type: none"> <li>• Multipotent and self-renewing</li> <li>• Cytokine and neurotrophin production</li> <li>• Tissue repair</li> </ul> | <ul style="list-style-type: none"> <li>• Cellular replacement</li> <li>• Neurogenesis</li> <li>• Angiogenesis</li> <li>• Synaptogenesis</li> </ul> | 109            |
| Mesenchymal stem cells | Human, canine and murine bone marrow            | None             | <ul style="list-style-type: none"> <li>• Multipotent and self-renewing</li> <li>• Cytokine and neurotrophin production</li> <li>• Tissue repair</li> </ul> | <ul style="list-style-type: none"> <li>• Cellular replacement</li> <li>• Neurogenesis</li> <li>• Angiogenesis</li> <li>• Synaptogenesis</li> </ul> | 157            |
| Mesenchymal stem cells | Murine bone marrow                              | None             | <ul style="list-style-type: none"> <li>• Multipotent and self-renewing</li> <li>• Cytokine and neurotrophin production</li> <li>• Tissue repair</li> </ul> | <ul style="list-style-type: none"> <li>• Cellular replacement</li> <li>• Neurogenesis</li> <li>• Angiogenesis</li> <li>• Synaptogenesis</li> </ul> | 11, 44, 56     |

|                                     |                                                                                                                        |                                                                          |                                                                                                                                                                                                                                                                        |                                                                                                                                                    |     |
|-------------------------------------|------------------------------------------------------------------------------------------------------------------------|--------------------------------------------------------------------------|------------------------------------------------------------------------------------------------------------------------------------------------------------------------------------------------------------------------------------------------------------------------|----------------------------------------------------------------------------------------------------------------------------------------------------|-----|
| Mesenchymal stem cells              | Rat bone marrow                                                                                                        | Induced with neurotrophin-3 and retinoic acid in culture                 | <ul style="list-style-type: none"> <li>• Multipotent and self-renewing</li> <li>• Cytokine and neurotrophin production</li> <li>• Tissue repair</li> </ul>                                                                                                             | <ul style="list-style-type: none"> <li>• Cellular replacement</li> <li>• Neurogenesis</li> <li>• Angiogenesis</li> <li>• Synaptogenesis</li> </ul> | 100 |
| Mesenchymal stem cells              | Rat placental tissue                                                                                                   | None                                                                     | <ul style="list-style-type: none"> <li>• Multipotent and self-renewing</li> <li>• Cytokine and neurotrophin production</li> <li>• Tissue repair</li> </ul>                                                                                                             | <ul style="list-style-type: none"> <li>• Cellular replacement</li> <li>• Neurogenesis</li> <li>• Angiogenesis</li> <li>• Synaptogenesis</li> </ul> | 78  |
| Mesenchymal stem cells              | Murine bone marrow                                                                                                     | Stromal cell-derived factor 1 $\alpha$ – chemokine preconditioned media  | <ul style="list-style-type: none"> <li>• Multipotent and self-renewing</li> <li>• Cytokine and neurotrophin production</li> <li>• Tissue repair</li> <li>• SDF-1<math>\alpha</math> treatment promotes chemotaxis and cellular homing to the site of injury</li> </ul> | <ul style="list-style-type: none"> <li>• Cellular replacement</li> <li>• Neurogenesis</li> <li>• Angiogenesis</li> <li>• Synaptogenesis</li> </ul> | 14  |
| Neurotrophic factor-secreting cells | Human adipose tissue-derived mesenchymal cells                                                                         | Transduced into neurotrophic factor-secreting cells                      | <ul style="list-style-type: none"> <li>• Multi lineage cells</li> <li>• Secrete significant amounts of neurotrophic factors</li> </ul>                                                                                                                                 | <ul style="list-style-type: none"> <li>• Cellular replacement</li> <li>• Neurogenesis</li> <li>• Angiogenesis</li> <li>• Synaptogenesis</li> </ul> | 153 |
| Neural stem cells                   | Rat brain tissue                                                                                                       | None                                                                     | Differentiation into neural and glial cells                                                                                                                                                                                                                            | <ul style="list-style-type: none"> <li>• Cellular replacement</li> <li>• Neurogenesis</li> </ul>                                                   | 51  |
| Neural stem cells                   | Murine bone marrow                                                                                                     | None                                                                     | Differentiation into neural and glial cells                                                                                                                                                                                                                            | <ul style="list-style-type: none"> <li>• Cellular replacement</li> <li>• Neurogenesis</li> </ul>                                                   | 97  |
| Neural stem cells                   | Murine bone marrow                                                                                                     | LINGO-1-Fc-Transduced                                                    | Differentiation into neural and glial cells                                                                                                                                                                                                                            | <ul style="list-style-type: none"> <li>• Cellular replacement</li> <li>• Neurogenesis</li> </ul>                                                   | 97  |
| Neural stem cells                   | Murine induced pluripotent stem cell                                                                                   | None                                                                     | Differentiation into neural and glial cells                                                                                                                                                                                                                            | <ul style="list-style-type: none"> <li>• Cellular replacement</li> <li>• Neurogenesis</li> </ul>                                                   | 214 |
| Neural stem cells                   | Rat brain tissue                                                                                                       | Transfected with glial cell line-derived neurotrophic factor (GDNF) gene | Differentiation into neural and glial cells                                                                                                                                                                                                                            | <ul style="list-style-type: none"> <li>• Cellular replacement</li> <li>• Neurogenesis</li> </ul>                                                   | 51  |
| Neural precursor cells              | Murine neonatal brain                                                                                                  | None                                                                     | Differentiation into neural and glial cells                                                                                                                                                                                                                            | <ul style="list-style-type: none"> <li>• Cellular replacement</li> <li>• Neurogenesis</li> </ul>                                                   | 60  |
| Neural precursor cells              | hiPSC line 8 (Royan hiPSC8, passage 22)                                                                                | None                                                                     | Differentiation into neural and glial cells                                                                                                                                                                                                                            | <ul style="list-style-type: none"> <li>• Cellular replacement</li> <li>• Neurogenesis</li> </ul>                                                   | 203 |
| Neural stem cells                   | Immortalized human NSC line, HB1.F3 (F3), established from primary cultures of a 15-week gestational human fetal brain | None                                                                     | Differentiation into neural and glial cells                                                                                                                                                                                                                            | <ul style="list-style-type: none"> <li>• Cellular replacement</li> <li>• Neurogenesis</li> </ul>                                                   | 8   |

|                                  |                                                                                                                        |                                                                 |                                                          |                                                                                                                                 |     |
|----------------------------------|------------------------------------------------------------------------------------------------------------------------|-----------------------------------------------------------------|----------------------------------------------------------|---------------------------------------------------------------------------------------------------------------------------------|-----|
| Oligodendrocyte progenitor cells | Immortalized human NSC line, HB1.F3 (F3), established from primary cultures of a 15-week gestational human fetal brain | F3.olig2 cells made by transduction of F3 cells with Olig2 cDNA | Differentiation into mature myelinating oligodendrocytes | <ul style="list-style-type: none"> <li>• Cellular replacement</li> <li>• Oligodendrogenesis</li> <li>• Remyelination</li> </ul> | 8   |
| Oligodendrocyte progenitor cells | Human induced pluripotent stem cell                                                                                    | None                                                            | Differentiation into mature myelinating oligodendrocytes | <ul style="list-style-type: none"> <li>• Cellular replacement</li> <li>• Oligodendrogenesis</li> <li>• Remyelination</li> </ul> | 180 |
| Oligodendrocyte progenitor cells | Human Wharton's Jelly (umbilical cord) mesenchymal stem cell                                                           | None                                                            | Differentiation into mature myelinating oligodendrocytes | <ul style="list-style-type: none"> <li>• Cellular replacement</li> <li>• Oligodendrogenesis</li> <li>• Remyelination</li> </ul> | 117 |

**Table S5H. RNA biologics**

| RNA Type                      | Delivery vehicle                | Sequence information                                                                                                                                                                                             | Mechanism(s) of action                                                                                                                                                                                                                                | Biological effect(s)                                                                                | Article Number |
|-------------------------------|---------------------------------|------------------------------------------------------------------------------------------------------------------------------------------------------------------------------------------------------------------|-------------------------------------------------------------------------------------------------------------------------------------------------------------------------------------------------------------------------------------------------------|-----------------------------------------------------------------------------------------------------|----------------|
| MicroRNA-146a mimic           | Lipid emulsion                  | <ul style="list-style-type: none"> <li>• Chemically modified for preferential RISC processing and to reduce degradation in vivo</li> <li>• Fluorescently labeled with CY3</li> </ul>                             | <ul style="list-style-type: none"> <li>• Upregulation of miRNA-146a expression</li> <li>• miRNA-146a is a negative regulator of genes in the TLR2 pathway</li> <li>• TLR2 signalling is upregulated in MS and inhibits OPC differentiation</li> </ul> | <ul style="list-style-type: none"> <li>• Oligodendrogenesis</li> <li>• Anti-inflammatory</li> </ul> | 217            |
| Short hairpin RNA (shRNA)     | Lentiviral vectors with GFP tag | <ul style="list-style-type: none"> <li>• LINGO-1 specific shRNA</li> <li>• Sequence not reported</li> </ul>                                                                                                      | <ul style="list-style-type: none"> <li>• Silencing of LINGO-1 gene expression</li> <li>• LINGO-1 inhibits OPC differentiation and axonal regeneration</li> </ul>                                                                                      | Neuroregenerative                                                                                   | 186            |
| Small interfering RNA (siRNA) | Monocationic lipid              | <p>4 different sequences combined</p> <ul style="list-style-type: none"> <li>• CACCCTCTGGATCTACTCCAA</li> <li>• CACCCTTTCTCTTCAACAA</li> <li>• AAGGAGCAGGACTCAGAACAA</li> <li>• CTGGTGGATTATAAGCCCAAA</li> </ul> | <ul style="list-style-type: none"> <li>• Silencing of Nogo receptor NgR1 expression</li> <li>• NogoA is known to inhibit myelination and regeneration in the CNS</li> </ul>                                                                           | Neuroregenerative                                                                                   | 145, 146       |
| Small interfering RNA (siRNA) | Chitosan nanoparticles          | <ul style="list-style-type: none"> <li>• LINGO-1 specific siRNA</li> <li>• Sequence/ catalogue information not reported</li> </ul>                                                                               | <ul style="list-style-type: none"> <li>• Silencing of LINGO-1 gene expression</li> <li>• LINGO-1 inhibits OPC differentiation and axonal regeneration</li> </ul>                                                                                      | Neuroregenerative                                                                                   | 204            |

**Table S5I. Lipid biologics**

| Name             | Structure                                                                                                                         | Mechanism(s) of action                                                                                                                                                                                                                                                                                                               | Biological effect(s)                                                                                         | PubChem CID | Article Number |
|------------------|-----------------------------------------------------------------------------------------------------------------------------------|--------------------------------------------------------------------------------------------------------------------------------------------------------------------------------------------------------------------------------------------------------------------------------------------------------------------------------------|--------------------------------------------------------------------------------------------------------------|-------------|----------------|
| E6020            | <ul style="list-style-type: none"> <li>Lipid A mimetic</li> <li>Phospholipid dimer with hexa-acylated acyclic backbone</li> </ul> | <ul style="list-style-type: none"> <li>Novel synthetic TLR4 agonist</li> <li>"Mimics the physiochemical and biological properties of Lipid A moieties in Gram-negative bacteria and activates TLR4 similar to the natural Gram-negative bacteria TLR4 ligand LPS, although the response is attenuated at equimolar doses"</li> </ul> | <ul style="list-style-type: none"> <li>Immune potentiator</li> <li>Candidate for vaccine adjuvant</li> </ul> | -           | 33             |
| GD1a ganglioside | Glycosphingolipid with 2 sialic acid residues<br>$C_{79}H_{139}N_3O_{39}$                                                         | <ul style="list-style-type: none"> <li>Signaling modulator of cell function</li> <li>Gangliosides can promote OPC maturation by inhibiting fibronectin and integrin interactions</li> </ul>                                                                                                                                          | <ul style="list-style-type: none"> <li>Cell growth</li> <li>Apoptosis</li> <li>Differentiation</li> </ul>    | 102601600   | 148            |

**Table S5J. Inorganic compounds**

| Name                             | Mechanism(s) of action                                                                                                                                                                                                                                        | Biological effect(s)                                                                   | FDA approved indication(s) | Accession Number |             | Article Number |
|----------------------------------|---------------------------------------------------------------------------------------------------------------------------------------------------------------------------------------------------------------------------------------------------------------|----------------------------------------------------------------------------------------|----------------------------|------------------|-------------|----------------|
|                                  |                                                                                                                                                                                                                                                               |                                                                                        |                            | DrugBank         | PubChem CID |                |
| Lithium carbonate ( $Li_2CO_3$ ) | <ul style="list-style-type: none"> <li>Not fully elucidated</li> <li>Inhibits multiple enzymes and interacts with a number of neurotransmitters and receptors</li> <li>May reduce inositol triphosphate levels by inhibiting inositol phosphatases</li> </ul> | <ul style="list-style-type: none"> <li>Psychiatric</li> <li>Mood stabilizer</li> </ul> | Bipolar disorder           | DB14509          | 11125       | 155            |

**Table S5K. Dietary interventions**

| Intervention                 | Structure                                                                                                                                                                                                                 | Method of administration         | Mechanism(s) of action                                                                                                                                                                                                                                      | Biological effect(s)                                                                                                                         | FDA approved indication(s) | Accession Number |             | Article Number |
|------------------------------|---------------------------------------------------------------------------------------------------------------------------------------------------------------------------------------------------------------------------|----------------------------------|-------------------------------------------------------------------------------------------------------------------------------------------------------------------------------------------------------------------------------------------------------------|----------------------------------------------------------------------------------------------------------------------------------------------|----------------------------|------------------|-------------|----------------|
|                              |                                                                                                                                                                                                                           |                                  |                                                                                                                                                                                                                                                             |                                                                                                                                              |                            | DrugBank         | PubChem CID |                |
| Cholesterol                  | Lipid sterol<br>C <sub>27</sub> H <sub>46</sub> O                                                                                                                                                                         | Rodent chow                      | <ul style="list-style-type: none"> <li>• Precursor for hormones, vitamins and bile acids</li> <li>• Component of cell membranes</li> </ul>                                                                                                                  | <ul style="list-style-type: none"> <li>• Endocrine</li> <li>• Metabolic</li> </ul>                                                           | N/A                        | DB04540          | 5997        | 16             |
| Docosahexaenoic acid (DHA)   | <ul style="list-style-type: none"> <li>• Omega-3 fatty acid</li> <li>• 22:6(n-3)</li> <li>• C<sub>22</sub>H<sub>32</sub>O<sub>2</sub></li> <li>• (4Z,7Z,10Z,13Z,16Z,19Z)-docosa-4,7,10,13,16,19-hexaenoic acid</li> </ul> | Rodent chow                      | <ul style="list-style-type: none"> <li>• A primary structural component of the CNS</li> <li>• Ligand at PPAR<math>\gamma</math> and <math>\alpha</math></li> <li>• Metabolites of DHA are anti-inflammatory lipid mediators</li> </ul>                      | <ul style="list-style-type: none"> <li>• Metabolic</li> <li>• Anti-inflammatory</li> </ul>                                                   | Doconexent supplement      | DB03756          | 445580      | 28             |
| Eicosapentaenoic acid (EPA)  | <ul style="list-style-type: none"> <li>• Omega-3 fatty acid</li> <li>• 20:5(n-3)</li> <li>• C<sub>20</sub>H<sub>30</sub>O<sub>2</sub></li> <li>• (5Z,8Z,11Z,14Z,17Z)-icosa-5,8,11,14,17-pentaenoic acid</li> </ul>        | Rodent chow or oral gavage       | <ul style="list-style-type: none"> <li>• Main n-3 PUFA in CNS</li> <li>• Precursor for prostaglandin-3 and thromboxane-3 metabolic pathways</li> <li>• EPA derivatives stimulate leukocyte chemotaxis, platelet aggregation and vasoconstriction</li> </ul> | <ul style="list-style-type: none"> <li>• Metabolic</li> <li>• Anti-inflammatory</li> <li>• Anti-thrombotic</li> </ul>                        | Icosapent supplement       | DB00159          | 446284      | 28, 40         |
| Alternate day fasting        | N/A                                                                                                                                                                                                                       | Restricted access to rodent chow | <ul style="list-style-type: none"> <li>• Nutrient and calorie restriction</li> <li>• Metabolic effects</li> </ul>                                                                                                                                           | <ul style="list-style-type: none"> <li>• Unclear</li> <li>• Multifactorial</li> <li>• Anti-inflammatory</li> <li>• Cardiovascular</li> </ul> | N/A                        | -                | -           | 128            |
| Fasting mimicking diet (FMD) | N/A                                                                                                                                                                                                                       | 3-day fasting cycles             | <ul style="list-style-type: none"> <li>• Nutrient and calorie restriction</li> <li>• Metabolic effects</li> </ul>                                                                                                                                           | <ul style="list-style-type: none"> <li>• Unclear</li> <li>• Multifactorial</li> <li>• Anti-inflammatory</li> <li>• Cardiovascular</li> </ul> | N/A                        | -                | -           | 32             |

**Table S5L. Physiological interventions**

| Intervention                               | Method of administration                                                                             | Mechanism(s) of action                                                                                                                                                                                                                                    | Biological effect(s)                                                                                                                           | FDA approved indication(s) | Article Number |
|--------------------------------------------|------------------------------------------------------------------------------------------------------|-----------------------------------------------------------------------------------------------------------------------------------------------------------------------------------------------------------------------------------------------------------|------------------------------------------------------------------------------------------------------------------------------------------------|----------------------------|----------------|
| Electroacupuncture therapy                 | Electrical stimulation via stainless steel needles inserted adjacent to the thoracic vertebral canal | <ul style="list-style-type: none"> <li>• Relief of nociceptive pain and promotion of repair through modulation of serotonergic receptors</li> <li>• Can stimulate the release of <math>\beta</math>-endorphin and adrenocorticotrophic hormone</li> </ul> | <ul style="list-style-type: none"> <li>• Analgesic</li> <li>• Tissue repair</li> </ul>                                                         | Devices are approved       | 100, 220       |
| Prolonged electrical stimulation           | CNS-implanted stimulation device                                                                     | <ul style="list-style-type: none"> <li>• Relief of nociceptive pain and promotion of repair through modulation of serotonergic receptors</li> <li>• Can stimulate the release of <math>\beta</math>-endorphin and adrenocorticotrophic hormone</li> </ul> | <ul style="list-style-type: none"> <li>• Analgesic</li> <li>• Tissue repair</li> </ul>                                                         | Devices are approved       | 105            |
| Pulsed focused ultrasound <sup>4</sup>     | Transcranial transducer with three different temporal frequency patterns                             | <ul style="list-style-type: none"> <li>• Activation of central neural circuits</li> <li>• Stimulation of local cytokine expression</li> <li>• Transient BBB disruption</li> <li>• Heating deep tissue</li> </ul>                                          | Tissue engineering and remodelling                                                                                                             | Devices are approved       | 135            |
| High-intensity exercise interval training  | Progressive increase in running speed on treadmill, 5 days per week                                  | <ul style="list-style-type: none"> <li>• Multiple but unclear</li> <li>• Presumed to be anti-inflammatory and/or upregulate growth factor secretion</li> <li>• Induction of neurogenesis and repair</li> </ul>                                            | <ul style="list-style-type: none"> <li>• Neuroregulatory</li> <li>• Anti-inflammatory</li> <li>• Psychological</li> <li>• Metabolic</li> </ul> | N/A                        | 124            |
| Low-intensity continuous exercise training | Progressive increase in running speed on treadmill, 5 days per week                                  | <ul style="list-style-type: none"> <li>• Multiple but unclear</li> <li>• Presumed to be anti-inflammatory and/or upregulate growth factor secretion</li> <li>• Induction of neurogenesis and repair</li> </ul>                                            | <ul style="list-style-type: none"> <li>• Neuroregulatory</li> <li>• Anti-inflammatory</li> <li>• Psychological</li> <li>• Metabolic</li> </ul> | N/A                        | 124            |
| Voluntary exercise                         | Free access to running wheel installed in cage                                                       | <ul style="list-style-type: none"> <li>• Multiple but unclear</li> <li>• Presumed to be anti-inflammatory and/or upregulate growth factor secretion</li> <li>• Induction of neurogenesis and repair</li> </ul>                                            | <ul style="list-style-type: none"> <li>• Neuroregulatory</li> <li>• Anti-inflammatory</li> <li>• Psychological</li> <li>• Metabolic</li> </ul> | N/A                        | 76, 107        |
| Environmental enhancement                  | Housing in a complex environment                                                                     | Enhances neurogenesis and synaptic plasticity in the hippocampus                                                                                                                                                                                          | <ul style="list-style-type: none"> <li>• Psychological or cognitive</li> <li>• Neuroregulatory</li> </ul>                                      | N/A                        | 3              |
| Socialization                              | Individual and group housing                                                                         | Enhances neurogenesis and synaptic plasticity in the hippocampus                                                                                                                                                                                          | <ul style="list-style-type: none"> <li>• Psychological or cognitive</li> <li>• Neuroregulatory</li> </ul>                                      | N/A                        | 106            |

## External references

1. Ge, X., Wang, Y., Lam, K. S. & Xu, A. Metabolic actions of FGF21: molecular mechanisms and therapeutic implications. *Acta Pharm. Sin. B* **2**, 350–357 (2012).
2. Deinsberger, J., Reisinger, D. & Weber, B. Global trends in clinical trials involving pluripotent stem cells: a systematic multi-database analysis. *Npj Regen. Med.* **5**, 1–13 (2020).
3. Martino, G., Franklin, R. J. M., Van Evercooren, A. B. & Kerr, D. A. Stem cell transplantation in multiple sclerosis: current status and future prospects. *Nat. Rev. Neurol.* **6**, 247–255 (2010).
4. Burks, S. R. *et al.* Investigation of Cellular and Molecular Responses to Pulsed Focused Ultrasound in a Mouse Model. *PLoS ONE* **6**, (2011).
5. Sun, Y. *et al.* The Neuroprotective Effect and Probable Mechanism of DL-3-n-Butylphthalide in Brain Diseases. *Integr. Med. Int.* **1**, 51–55 (2014).
6. Singh, B. N., Shankar, S. & Srivastava, R. K. Green tea catechin, epigallocatechin-3-gallate (EGCG): mechanisms, perspectives and clinical applications. *Biochem. Pharmacol.* **82**, 1807–1821 (2011).
7. Fox, E. J. Mechanism of action of mitoxantrone. *Neurology* **63**, S15-18 (2004).
8. Rauf, A. *et al.* Proanthocyanidins: A comprehensive review. *Biomed. Pharmacother.* **116**, 108999 (2019).
9. Lohmander, S., Madsen, K. & Hinek, A. Secretion of Proteoglycans by Chondrocytes. Influence of Colchicine, Cytochalasin B, and  $\beta$ -D-Xyloside. in *Glycoconjugate Research* (eds. Gregory, J. D. & Jeanloz, R. W.) 725–728 (Academic Press, 1979). doi:10.1016/B978-0-12-301302-6.50027-0.
10. Fujiwara, Y. Cyclic Phosphatidic Acid – A Unique Bioactive Phospholipid. *Biochim. Biophys. Acta* **1781**, 519–524 (2008).

11. Yang, R., Zhu, S. & Tonnessen, T. I. Ethyl pyruvate is a novel anti-inflammatory agent to treat multiple inflammatory organ injuries. *J. Inflamm. Lond. Engl.* **13**, (2016).
12. Griffin, B. W., Klimko, P., Crider, J. Y. & Sharif, N. A. AL-8810: A Novel Prostaglandin F<sub>2</sub> $\alpha$  Analog with Selective Antagonist Effects at the Prostaglandin F<sub>2</sub> $\alpha$  (FP) Receptor. *J. Pharmacol. Exp. Ther.* **290**, 1278–1284 (1999).
13. Xia, S. & Fang, D. Pharmacological action and mechanisms of ginkgolide B. *Chin. Med. J. (Engl.)* **120**, 922–928 (2007).
14. Esbenshade, T. A. *et al.* The histamine H<sub>3</sub> receptor: an attractive target for the treatment of cognitive disorders. *Br. J. Pharmacol.* **154**, 1166–1181 (2008).
15. Kieseier, B. C. Defining a role for laquinimod in multiple sclerosis. *Ther. Adv. Neurol. Disord.* **7**, 195–205 (2014).
16. Stockwell, J., Jakova, E. & Cayabyab, F. S. Adenosine A<sub>1</sub> and A<sub>2A</sub> Receptors in the Brain: Current Research and Their Role in Neurodegeneration. *Mol. J. Synth. Chem. Nat. Prod. Chem.* **22**, (2017).
17. Yin, L.-L., Lin, L.-L., Zhang, L. & Li, L. Epimedium flavonoids ameliorate experimental autoimmune encephalomyelitis in rats by modulating neuroinflammatory and neurotrophic responses. *Neuropharmacology* **63**, 851–862 (2012).
18. Ijomone, O., Nwoha, P., Olaibi, O., Obi, A. & Alese, M. Neuroprotective Effects of Kolaviron, a Biflavonoid Complex of *Garcinia kola*, on Rats Hippocampus against Methamphetamine-Induced Neurotoxicity. *Maced. J. Med. Sci.* **5**, 10–16 (2012).
19. Kremer, D. *et al.* The neutralizing antibody GNBAC1 abrogates HERV-W envelope protein-mediated oligodendroglial maturation blockade. *Mult Scler.* **21**, 1200-3 (2015).
20. Kremer, D. *et al.* pHERV-W envelope protein fuels microglial cell-dependent damage of myelinated axons in multiple sclerosis. *Proc Natl Acad Sci.* **116**, 15216-15225 (2019).
